# Supplementary material for: A chiral pentanidium and pyridinyl-sulphonamide ion pair as an enantioselective organocatalyst for Steglich rearrangement
Source: Royal Society of Chemistry journal article supplement (doi:10.1039/d3sc04397e), 2023-01-01
Supplement: d3sc04397e1.pdf [file d3sc04397e1.pdf]

## Chiral Pentanidium and Pyridinyl-Sulphonamide Ion Pair as Enantioselective Organocatalyst for Steglich rearrangement

Ziqi Yang,<sup>a</sup> Chaoran Xu,<sup>a</sup> Xianxian Zhou,<sup>a</sup> Choon Boon Cheong,<sup>\*ab</sup> Choon Wee Kee,<sup>\*b</sup> and Choon-Hong Tan<sup>\*a</sup>

<sup>a</sup> School of Chemistry, Chemical Engineering and Biotechnology, Nanyang Technological University, 21 Nanyang Link, Singapore 637371, Republic of Singapore. E-mail: chonghong@ntu.edu.sg

<sup>b</sup> Institute of Sustainability for Chemicals, Energy and Environment (ISCE2), Agency for Science, Technology and Research (A\*STAR), 1 Pesek Road, Jurong Island, Singapore 627833, Republic of Singapore. E-mail: Cheong\_Choon\_Boon@isce2.a-star.edu.sg; kee\_choon\_wee@isce2.a-star.edu.sg

## Table of Contents

|           |                                                                                                                                                    |     |
|-----------|----------------------------------------------------------------------------------------------------------------------------------------------------|-----|
| <b>1</b>  | <b>General information</b>                                                                                                                         | S3  |
| <b>2</b>  | <b>Preparation of chiral guanidinium salt</b>                                                                                                      | S3  |
| <b>3</b>  | <b>Preparation and characterization of neutral pyridinyl sulfonamide</b>                                                                           | S3  |
| <b>4</b>  | <b>Preparation and characterization of chiral pentanidium pyridinyl-sulfonamide ion pairs</b>                                                      | S5  |
| <b>5</b>  | <b>General procedure and characterisation of asymmetric Steglich rearrangement</b>                                                                 | S9  |
| <b>6</b>  | <b>General procedure and characterisation of enantioselective Steglich rearrangement products</b>                                                  | S10 |
| <b>7</b>  | <b>Table S1. Proof of concept experiments to apply chiral ion pair catalyst in enantioselective Steglich rearrangement of oxindole derivatives</b> | S14 |
| <b>8</b>  | <b>2D NOESY and 2D ROESY spectra for catalyst 1a-2f</b>                                                                                            | S14 |
| <b>9</b>  | <b>Computational methods</b>                                                                                                                       | S15 |
| <b>10</b> | <b>Supplementary Computational Results</b>                                                                                                         | S18 |
| <b>11</b> | <b>The Optimization of Reaction Conditions</b>                                                                                                     | S20 |
|           | <b>Reference</b>                                                                                                                                   | S22 |
|           | <b>NMR and HPLC spectra</b>                                                                                                                        | S23 |

## 1. General information

### General

$^1\text{H}$  NMR,  $^{13}\text{C}$  NMR and  $^{19}\text{F}$  NMR spectra were recorded on Bruker AVIII 400 (400 MHz) spectrometer, JEOL JNM-ECA 400 (400 MHz) spectrometer or JEOL JNM-ECZL 500 (500MHz) spectrometer. The residual solvent peak was used as an internal reference. 2D NOESY and 2D ROESY spectra were obtained on a Bruker AVIII 400 (400MHz) spectrometer. Chemical shifts are recorded as  $\delta$  in units of parts per million (ppm). High resolution mass spectra (HRMS) were obtained on the Q-ToF Premier mass spectrometer (Waters Corporation) and reported in units of mass of charge ratio (m/z). Enantiomeric excess values were determined by HPLC analysis on Shimadzu LC-20AT and LC-2010CHT HPLC workstations. Optical rotations were measured in DCM using a 1 mL cell with a 1 dm path length on a Jasco P-1030 polarimeter with a sodium lamp of wavelength 589 nm and reported as follows:  $[\alpha]_{\text{D}}^{\text{T}}$  ( $c = \text{g}/100 \text{ mL}$ , solvent). X-ray crystallography analysis was performed on Bruker X8 APEX X-ray diffractionmeter. Flash column chromatography were performed on Merck 60 (0.040-0.063mm) mesh silica gel. Analytical thin-layer chromatography (TLC) was performed on Merck 60 F254 silica gel plates. Visualization was performed using a UV lamp.

### Materials

THF were distilled over sodium/benzophenone under  $\text{N}_2$  atmosphere. Toluene, acetonitrile and dichloromethane were distilled over  $\text{CaH}_2$  under  $\text{N}_2$  atmosphere. Other reagents and solvents were commercial grade and were used as supplied without further purification, unless otherwise stated. Experiments involving moisture and/or air sensitive components were performed under a positive pressure of nitrogen in oven-dried glassware equipped with a rubber septum inlet. All compounds synthesized were stored in  $4^\circ\text{C}$  fridge or  $-20^\circ\text{C}$  freezer.

## 2. Preparation of chiral guanidinium salt

All pentanidium chloride (**1a-Cl** - **1c-Cl**) were synthesized following reported procedures.<sup>[1]</sup> All synthesized chiral pentanidium chloride are used for ion-pair formation directly.

## 3. Preparation and characterization of neutral pyridinyl sulfonamide

### a. Preparation of neutral pyridinyl sulfonamide

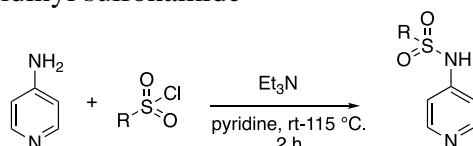

**Method A:** The synthesis of **H-2a** and **H-2e** were synthesized by this method.<sup>[2]</sup> Sulfonyl chloride (10 mmol, 1 equiv.) was added into the solution of 4-aminopyridine (10 mmol, 1 equiv.) in 10 mL pyridine. The mixture was stirred at room temperature for 10 min. Then  $\text{Et}_3\text{N}$  (30 mmol, 3 equiv.) was added and reflux for 2 h. The mixture was cooled down to evaporate solvent in vacuum. The solid residue was washed with boiling water and boiling acetone to afford neutral pyridinyl sulfonamide product.

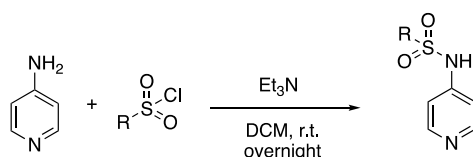

**Method B:** All neutral catalysts except **H-2a** and **H-2e** were synthesized by this method. 4-aminopyridine (10 mmol, 1 equiv.) and Et<sub>3</sub>N (15 mmol, 1.5 equiv.) was dissolved in distilled DCM, then sulfonyl chloride (15 mmol, 1.5 equiv.) was added slowly under 0 °C and stirred at room temperature overnight. Solvent was evaporated after reaction finished. The solid was collected and dried after washing with cold water and cold acetone.

b. Characterization of neutral pyridinyl sulfonamide

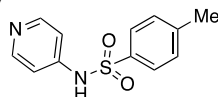

**4-methyl-N-(pyridin-4-yl)benzenesulfonamide (H-2a):** white solid; <sup>1</sup>H NMR (400 MHz, DMSO-*d*<sub>6</sub>): δ 8.01 (s, 1H), 7.69 (d, *J* = 8.1 Hz, 1H), 7.30 (d, *J* = 7.9 Hz, 1H), 6.91 (d, *J* = 6.5 Hz, 1H), 2.33 (s, 2H); <sup>13</sup>C NMR (101 MHz, DMSO-*d*<sub>6</sub>): δ 129.3, 126.2, 114.0, 87.8, 74.5, 20.9; HRMS (ESI) calcd for C<sub>12</sub>H<sub>13</sub>N<sub>2</sub>O<sub>2</sub>S *m/z* [M+H]<sup>+</sup>: 249.0692; found: 249.069.

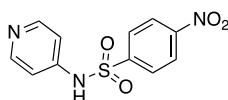

**4-nitro-N-(pyridin-4-yl)benzenesulfonamide (H-2b):** pale yellow solid; <sup>1</sup>H NMR (396 MHz, DMSO-*d*<sub>6</sub>): δ 8.32-8.25 (m, 2H), 8.05-7.93 (m, 4H), 6.88 (d, *J* = 7.1 Hz, 2H); <sup>13</sup>C NMR (100 MHz, DMSO-*d*<sub>6</sub>): δ 160.8, 150.6, 148.5, 141.9, 127.5, 124.0, 115.3; HRMS (ESI) calcd for C<sub>11</sub>H<sub>10</sub>N<sub>3</sub>O<sub>4</sub>S *m/z* [M+H]<sup>+</sup>: 280.0387; found: 280.0384.

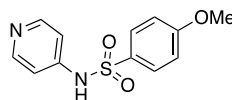

**4-methoxy-N-(pyridin-4-yl)benzenesulfonamide (H-2c):** white solid; <sup>1</sup>H NMR (400 MHz, DMSO-*d*<sub>6</sub>): δ 8.03 (s, 2H), 7.74 (d, *J* = 8.7 Hz, 2H), 7.02 (d, *J* = 8.7 Hz, 2H), 6.91 (d, *J* = 5.9 Hz, 2H), 3.79 (s, 3H); <sup>13</sup>C NMR (101 MHz, DMSO-*d*<sub>6</sub>): δ 128.3, 114.0, 55.5; HRMS (ESI) calcd for C<sub>12</sub>H<sub>11</sub>N<sub>2</sub>O<sub>3</sub>S *m/z* [M-H]<sup>-</sup>: 263.0496; found: 263.0489.

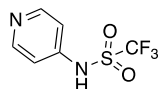

**1,1,1-trifluoro-N-(pyridin-4-yl)methanesulfonamide (H-2d):** white solid; <sup>1</sup>H NMR (400 MHz, DMSO-*d*<sub>6</sub>): δ 13.62 (s, 1H), 8.28 (d, *J* = 7.3 Hz, 2H), 7.28 (d, *J* = 7.3 Hz, 2H); <sup>13</sup>C NMR (101 MHz, DMSO-*d*<sub>6</sub>): δ 163.7, 140.1, 122.3, 119.1, 116.9; HRMS (ESI) calcd for C<sub>6</sub>H<sub>6</sub>F<sub>3</sub>N<sub>2</sub>O<sub>2</sub>S *m/z* [M+H]<sup>+</sup>: 227.0097; found: 227.0101.

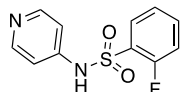

**2-fluoro-N-(pyridin-4-yl)benzenesulfonamide (H-2e):** white solid; <sup>1</sup>H NMR (396 MHz, DMSO-*d*<sub>6</sub>): δ 8.00 (d, *J* = 6.4 Hz, 2H), 7.86 (t, *J* = 7.2 Hz, 1H), 7.57 (q, *J* = 6.1 Hz, 1H), 7.29 (q, *J* = 8.5, 7.9 Hz, 2H), 6.94 (d, *J* = 6.5 Hz, 2H); <sup>13</sup>C NMR (100 MHz, DMSO-*d*<sub>6</sub>): δ 159.7, 157.2, 133.8, 129.2, 124.3, 117.1, 116.9; <sup>19</sup>F NMR (373 MHz, DMSO-*d*<sub>6</sub>): δ -109.5; HRMS (ESI) calcd for C<sub>11</sub>H<sub>10</sub>FN<sub>2</sub>O<sub>2</sub>S *m/z* [M+H]<sup>+</sup>: 253.0442; found: 253.0443.

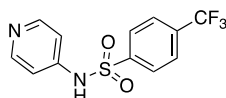

**N-(pyridin-4-yl)-4-(trifluoromethyl)benzenesulfonamide (H-2f):** white solid;  $^1\text{H}$  NMR (396 MHz, DMSO-*d*<sub>6</sub>):  $\delta$  8.34-7.92 (m, 4H), 7.86 (d,  $J$  = 8.3 Hz, 2H), 6.94 (d,  $J$  = 7.1 Hz, 2H);  $^{13}\text{C}$  NMR (100 MHz, DMSO-*d*<sub>6</sub>):  $\delta$  127.8, 126.9, 126.0, 125.9, 125.1, 122.3, 115.0;  $^{19}\text{F}$  NMR (373 MHz, DMSO-*d*<sub>6</sub>):  $\delta$  -61.3; HRMS (ESI) calcd for C<sub>12</sub>H<sub>8</sub>F<sub>3</sub>N<sub>2</sub>O<sub>2</sub>S  $m/z$  [M-H]<sup>-</sup>: 301.0264; found: 301.0259.

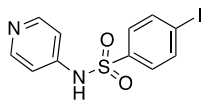

**4-iodo-N-(pyridin-4-yl)benzenesulfonamide (H-2g):** white solid;  $^1\text{H}$  NMR (396 MHz, DMSO-*d*<sub>6</sub>):  $\delta$  7.99 (d,  $J$  = 7.0 Hz, 2H), 7.86 (d,  $J$  = 8.4 Hz, 2H), 7.55 (d,  $J$  = 8.3 Hz, 2H), 6.90 (d,  $J$  = 7.0 Hz, 2H);  $^{13}\text{C}$  NMR (100 MHz, DMSO-*d*<sub>6</sub>):  $\delta$  137.6, 128.0, 114.7; HRMS (ESI) calcd for C<sub>11</sub>H<sub>10</sub>IN<sub>2</sub>O<sub>2</sub>S  $m/z$  [M+H]<sup>+</sup>: 360.9502; found: 360.9501.

#### 4. Preparation and characterization of chiral pentanidium pyridinyl-sulfonamide ion pairs

##### a. Preparation of chiral pentanidium pyridinyl-sulfonamide ion pairs

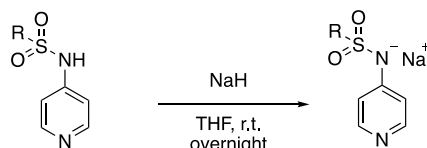

**Step 1:** The produced pyridine sulfonamide (1 equiv., 3mmol) was added in 10 mL distilled THF, and sodium hydride (1 equiv., 3mmol) was added slowly into the suspension. The whole mixture was stirred overnight at room temperature. The product was obtained by gravity filtration after reaction finished.

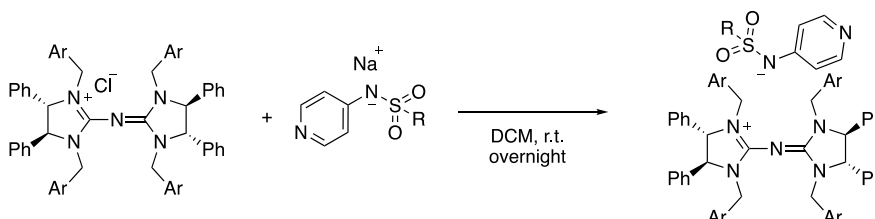

**Step 2:** The mixture of pentanidium chloride (0.01 mmol, 1 equiv.) and sodium salt of pyridinyl-sulfonamide (0.03 mmol, 3 equiv.) in 1 mL DCM was stirred overnight in a 4 mL vial at room temperature. The mixture was passed through a Kimwipe-plugged pipette and clear solution was obtained. The pentanidium pyridinyl-sulfonamide was obtained after solvent evaporation.

##### b. Characterization of chiral pentanidium pyridinyl-sulfonamide ion pairs

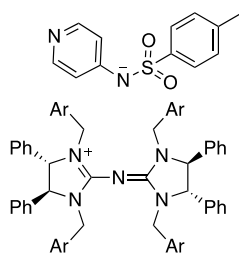

Ar=3,5-di-tertbutylphenyl

**(4S,5S)-2-(((4S,5S)-1,3-bis(3,5-di-tert-butylbenzyl)-4,5-diphenylimidazolidin-2-ylidene)amino)-1,3-bis(3,5-di-tert-butylbenzyl)-4,5-diphenyl-4,5-dihydro-1H-imidazol-3-ium pyridin-4-yl(tosyl)amide (1a-2a):** white solid; <sup>1</sup>H NMR (396 MHz, Chloroform-*d*) δ 7.84 (d, *J* = 8.0 Hz, 2H), 7.77 (d, *J* = 6.8 Hz, 2H), 7.37 (t, *J* = 7.1 Hz, 4H), 7.33 – 7.27 (m, 12H), 7.15 (d, *J* = 8.1 Hz, 2H), 7.01 (d, *J* = 6.6 Hz, 2H), 7.02 – 6.71 (m, 16H), 5.19 (d, *J* = 14.8 Hz, 4H), 4.40 (s, 4H), 4.10 (d, *J* = 14.8 Hz, 4H), 2.32 (s, 3H), 1.11 (s, 72H); <sup>13</sup>C NMR (100 MHz, Chloroform-*d*) δ 157.5, 152.2, 136.5, 131.7, 131.0, 129.9, 129.7, 129.1, 128.9, 127.3, 126.9, 123.4, 122.5, 115.5, 68.2, 49.3, 34.8, 31.3, 29.8; HRMS (+ESI) *m/z* [C<sub>90</sub>H<sub>116</sub>N<sub>5</sub>]<sup>+</sup>: 1266.9231; found: 1266.9231; HRMS (–ESI) *m/z* [C<sub>12</sub>H<sub>11</sub>N<sub>2</sub>O<sub>2</sub>S]<sup>–</sup>: 247.0547; found: 247.0545; [α]<sup>23</sup><sub>D</sub> = –77.40 (*c* 1.0, CH<sub>2</sub>Cl<sub>2</sub>).

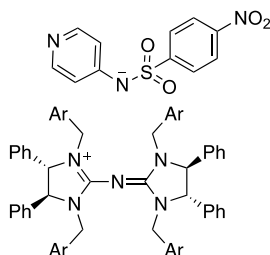

Ar=3,5-di-tertbutylphenyl

**(4S,5S)-2-(((4S,5S)-1,3-bis(3,5-di-tert-butylbenzyl)-4,5-diphenylimidazolidin-2-ylidene)amino)-1,3-bis(3,5-di-tert-butylbenzyl)-4,5-diphenyl-4,5-dihydro-1H-imidazol-3-ium ((4-nitrophenyl)sulfonyl)(pyridin-4-yl)amide (1a-2b):** yellow solid; <sup>1</sup>H NMR (396 MHz, Chloroform-*d*) δ 8.30 – 8.08 (m, 4H), 7.92 (d, *J* = 6.9 Hz, 2H), 7.61 (ddd, *J* = 70.1, 5.7, 3.3 Hz, 1H), 7.41 – 7.27 (m, 16H), 7.05 (d, *J* = 7.0 Hz, 2H), 7.03 – 6.65 (m, 16H), 5.20 (d, *J* = 14.8 Hz, 4H), 4.40 (s, 4H), 4.11 (d, *J* = 14.8 Hz, 4H), 1.11 (s, 72H); <sup>13</sup>C NMR (100 MHz, Chloroform-*d*) δ 157.5, 152.2, 136.5, 132.6, 131.7, 131.0, 129.9, 129.7, 128.9, 128.0, 127.3, 123.7, 123.4, 122.5, 116.1, 68.2, 49.3, 34.8, 31.3; HRMS (+ESI) *m/z* [C<sub>90</sub>H<sub>116</sub>N<sub>5</sub>]<sup>+</sup>: 1266.9231; found: 1266.9231; HRMS (–ESI) *m/z* [C<sub>11</sub>H<sub>8</sub>N<sub>3</sub>O<sub>4</sub>S]<sup>–</sup>: 278.0241; found: 278.0243; [α]<sup>23</sup><sub>D</sub> = –81.94 (*c* 1.7, CH<sub>2</sub>Cl<sub>2</sub>).

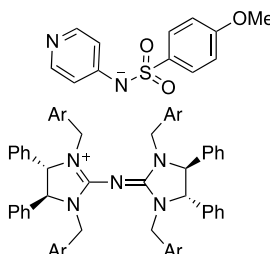

Ar=3,5-di-tertbutylphenyl

**(4S,5S)-2-(((4S,5S)-1,3-bis(3,5-di-tert-butylbenzyl)-4,5-diphenylimidazolidin-2-ylidene)amino)-1,3-bis(3,5-di-tert-butylbenzyl)-4,5-diphenyl-4,5-dihydro-1H-imidazol-3-ium ((4-methoxyphenyl)sulfonyl)(pyridin-4-yl)amide (1a-2c):** white solid; <sup>1</sup>H NMR (396 MHz, Chloroform-*d*) δ 7.91 – 7.81 (m, 4H), 7.40 – 7.27 (m, 16H), 7.00 (d, *J* = 7.2 Hz, 2H),

6.92 – 6.85 (m, 16H), 5.19 (d,  $J = 14.8$  Hz, 4H), 4.40 (s, 4H), 4.11 (d,  $J = 14.8$  Hz, 4H), 3.79 (s, 3H), 1.11 (s, 72H);  $^{13}\text{C}$  NMR (100 MHz, Chloroform-*d*)  $\delta$  157.5, 152.2, 136.5, 131.7, 129.9, 129.7, 128.8, 127.3, 123.4, 122.5, 115.4, 113.7, 68.2, 55.5, 49.4, 34.8, 31.3; HRMS (+ESI)  $m/z$  [ $\text{C}_{90}\text{H}_{116}\text{N}_5$ ] $^+$ : 1266.9231; found: 1266.9231; HRMS (–ESI)  $m/z$  [ $\text{C}_{12}\text{H}_{11}\text{N}_2\text{O}_5\text{S}$ ] $^-$ : 263.0495; found: 263.0493;  $[\alpha]_{\text{D}}^{23} = -97.41$  ( $c$  1.7,  $\text{CH}_2\text{Cl}_2$ ).

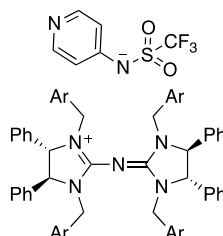

Ar=3,5-di-tertbutylphenyl

**(4S,5S)-2-(((4S,5S)-1,3-bis(3,5-di-tert-butylbenzyl)-4,5-diphenylimidazolidin-2-ylidene)amino)-1,3-bis(3,5-di-tert-butylbenzyl)-4,5-diphenyl-4,5-dihydro-1H-imidazol-3-ium pyridin-4-yl((trifluoromethyl)sulfonyl)amide (1a-2d):** white solid;  $^1\text{H}$  NMR (396 MHz, Chloroform-*d*)  $\delta$  8.16 – 8.09 (m, 2H), 7.39 – 7.34 (m, 4H), 7.33 – 7.27 (m, 12H), 7.23 – 7.20 (m, 2H), 6.93 – 6.84 (m, 16H), 5.19 (d,  $J = 14.8$  Hz, 4H), 4.40 (s, 4H), 4.11 (d,  $J = 14.8$  Hz, 4H), 1.11 (s, 72H);  $^{13}\text{C}$  NMR (100 MHz, Chloroform-*d*)  $\delta$  157.48, 152.21, 136.47, 131.70, 129.93, 129.67, 127.31, 123.39, 122.55, 118.03, 68.25, 49.36, 34.83, 31.31;  $^{19}\text{F}$  NMR (373 MHz, Chloroform-*d*)  $\delta$  –76.95; HRMS (+ESI)  $m/z$  [ $\text{C}_{90}\text{H}_{116}\text{N}_5$ ] $^+$ : 1266.9231; found: 1266.9232; HRMS (–ESI)  $m/z$  [ $\text{C}_6\text{H}_4\text{F}_3\text{N}_2\text{O}_2\text{S}$ ] $^-$ : 224.9951; found: 224.9954;  $[\alpha]_{\text{D}}^{23} = -24.19$  ( $c$  1.6,  $\text{CH}_2\text{Cl}_2$ ).

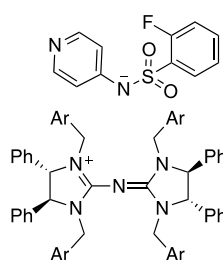

Ar=3,5-di-tertbutylphenyl

**(4S,5S)-2-(((4S,5S)-1,3-bis(3,5-di-tert-butylbenzyl)-4,5-diphenylimidazolidin-2-ylidene)amino)-1,3-bis(3,5-di-tert-butylbenzyl)-4,5-diphenyl-4,5-dihydro-1H-imidazol-3-ium ((2-fluorophenyl)sulfonyl)(pyridin-4-yl)amide (1a-2e):** white solid;  $^1\text{H}$  NMR (396 MHz, Chloroform-*d*)  $\delta$  7.98 (t,  $J = 7.5$  Hz, 1H), 7.86 (d,  $J = 6.7$  Hz, 2H), 7.61 (ddd,  $J = 70.1, 5.6, 3.3$  Hz, 1H), 7.40 – 7.28 (m, 16H), 7.12 – 7.00 (m, 4H), 6.93 – 6.84 (m, 16H), 5.20 (d,  $J = 14.8$  Hz, 4H), 4.40 (s, 4H), 4.11 (d,  $J = 14.8$  Hz, 4H), 1.11 (s, 72H);  $^{13}\text{C}$  NMR (100 MHz, Chloroform-*d*)  $\delta$  157.5, 152.2, 136.5, 131.7, 130.2, 129.9, 129.7, 128.9, 127.3, 123.4, 122.5, 116.7, 115.9, 68.2, 49.4, 34.8, 31.3;  $^{19}\text{F}$  NMR (373 MHz, Chloroform-*d*)  $\delta$  –108.8; HRMS (+ESI)  $m/z$  [ $\text{C}_{90}\text{H}_{116}\text{N}_5$ ] $^+$ : 1266.9231; found: 1266.9231; HRMS (–ESI)  $m/z$  [ $\text{C}_{11}\text{H}_8\text{N}_2\text{O}_2\text{SF}$ ] $^-$ : 251.0296; found: 251.0300;  $[\alpha]_{\text{D}}^{23} = -62.53$  ( $c$  1.5,  $\text{CH}_2\text{Cl}_2$ ).

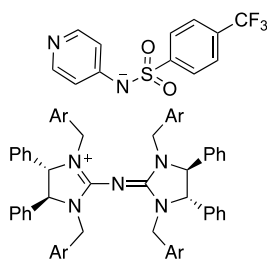

Ar=3,5-di-tertbutylphenyl

**(4S,5S)-2-(((4S,5S)-1,3-bis(3,5-di-tert-butylbenzyl)-4,5-diphenylimidazolidin-2-ylidene)amino)-1,3-bis(3,5-di-tert-butylbenzyl)-4,5-diphenyl-4,5-dihydro-1H-imidazol-3-ium pyridin-4-yl((4-(trifluoromethyl)phenyl)sulfonyl)amide (1a-2f):** white solid;  $^1\text{H}$  NMR (400 MHz, Chloroform-*d*)  $\delta$  8.07 (d,  $J = 8.7$  Hz, 2H), 7.95 (d,  $J = 6.8$  Hz, 2H), 7.56 (d,  $J = 8.7$  Hz, 2H), 7.39 – 7.33 (m, 4H), 7.32 – 7.25 (m, 12H), 6.97 (d,  $J = 6.8$  Hz, 2H), 6.93 – 6.83 (m, 16H), 5.19 (d,  $J = 14.8$  Hz, 4H), 4.40 (s, 4H), 4.11 (d,  $J = 14.8$  Hz, 4H), 1.11 (s, 72H);  $^{13}\text{C}$  NMR (101 MHz, Chloroform-*d*)  $\delta$  157.5, 152.2, 136.4, 131.7, 129.9, 129.7, 127.3, 127.3, 125.4, 125.3, 123.4, 122.5, 116.2, 68.2, 49.3, 34.8, 31.3; HRMS (+ESI)  $m/z$  [ $\text{C}_{90}\text{H}_{116}\text{N}_5$ ] $^+$ : 1266.9231; found: 1266.9231; HRMS (–ESI)  $m/z$  [ $\text{C}_{12}\text{H}_8\text{N}_2\text{O}_2\text{SF}_3$ ] $^-$ : 301.0259; found: 301.0264;  $[\alpha]_{\text{D}}^{23} = -106.41$  (*c* 1.7,  $\text{CH}_2\text{Cl}_2$ ).

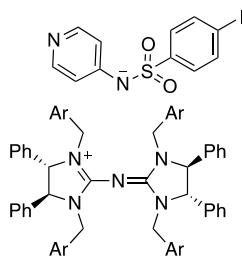

Ar=3,5-di-tertbutylphenyl

**(4S,5S)-2-(((4S,5S)-1,3-bis(3,5-di-tert-butylbenzyl)-4,5-diphenylimidazolidin-2-ylidene)amino)-1,3-bis(3,5-di-tert-butylbenzyl)-4,5-diphenyl-4,5-dihydro-1H-imidazol-3-ium ((4-iodophenyl)sulfonyl)(pyridin-4-yl)amide (1a-2g):** white solid;  $^1\text{H}$  NMR (396 MHz, Chloroform-*d*)  $\delta$  7.84 (d,  $J = 7.1$  Hz, 2H), 7.69 (s, 4H), 7.41 – 7.27 (m, 16H), 7.03 (d,  $J = 7.2$  Hz, 2H), 6.92 – 6.83 (m, 16H), 5.19 (d,  $J = 14.8$  Hz, 4H), 4.40 (s, 4H), 4.11 (d,  $J = 14.8$  Hz, 4H), 1.11 (s, 72H);  $^{13}\text{C}$  NMR (100 MHz, Chloroform-*d*)  $\delta$  157.5, 152.2, 139.3, 137.6, 136.5, 131.7, 129.9, 129.7, 128.6, 127.3, 123.4, 122.5, 115.8, 68.2, 49.4, 34.8, 31.3; HRMS (+ESI)  $m/z$  [ $\text{C}_{90}\text{H}_{116}\text{N}_5$ ] $^+$ : 1266.9231; found: 1266.9264; HRMS (–ESI)  $m/z$  [ $\text{C}_{11}\text{H}_8\text{N}_2\text{O}_2\text{SI}$ ] $^-$ : 358.9356; found: 358.9357;  $[\alpha]_{\text{D}}^{23} = -50.65$  (*c* 1.7,  $\text{CH}_2\text{Cl}_2$ ).

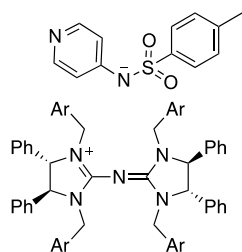

Ar=3,5-di-trifluoromethylphenyl

**(4S,5S)-2-(((4S,5S)-1,3-bis(3,5-bis(trifluoromethyl)benzyl)-4,5-diphenylimidazolidin-2-ylidene)amino)-1,3-bis(3,5-bis(trifluoromethyl)benzyl)-4,5-diphenyl-4,5-dihydro-1H-imidazol-3-ium pyridin-4-yl(tosyl)amide (1b-2a):** white solid;  $^1\text{H}$  NMR (396 MHz, Chloroform-*d*)  $\delta$  7.97 (d,  $J = 6.5$  Hz, 2H), 7.72 (d,  $J = 8.2$  Hz, 2H), 7.69 (s, 4H), 7.51 (s, 8H), 7.23 (d,  $J = 7.5$  Hz, 4H), 7.16–7.10 (m, 10H), 6.99 (d,  $J = 7.5$  Hz, 8H), 6.87 (d,  $J = 6.5$  Hz, 2H),



5.09 (d,  $J = 16.2$  Hz, 4H), 4.89 (s, 4H), 4.81 (d,  $J = 16.2$  Hz, 4H), 2.33 (s, 3H);  $^{13}\text{C}$  NMR (100 MHz, Chloroform-*d*)  $\delta$  157.8, 137.3, 134.2, 132.5, 132.2, 130.3, 129.6, 129.2, 128.1, 126.8, 124.3, 121.5, 115.5, 70.3, 49.2;  $^{19}\text{F}$  NMR (373 MHz, Chloroform-*d*)  $\delta$  -63.1; HRMS (+ESI)  $m/z$  [ $\text{C}_{66}\text{H}_{44}\text{F}_{24}\text{N}_5$ ] $^+$ : 1362.3213; found: 1362.3203; HRMS (-ESI)  $m/z$  [ $\text{C}_{12}\text{H}_{11}\text{N}_2\text{O}_2\text{S}$ ] $^-$ : 247.0547; found: 247.0546;  $[\alpha]_{\text{D}}^{23} = -6.80$  ( $c$  0.5,  $\text{CH}_2\text{Cl}_2$ ).

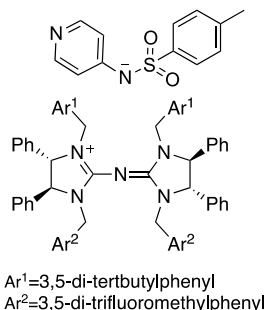

**(4S,5S)-1-(3,5-bis(trifluoromethyl)benzyl)-2-(((4S,5S)-1-(3,5-bis(trifluoromethyl)benzyl)-3-(3,5-di-tert-butylbenzyl)-4,5-diphenylimidazolidin-2-ylidene)amino)-3-(3,5-di-tert-butylbenzyl)-4,5-diphenyl-4,5-dihydro-1H-imidazol-3-ium pyridin-4-yl(tosyl)amide (1c-2a):** white solid;  $^1\text{H}$  NMR (400 MHz, Chloroform-*d*)  $\delta$  7.89 (d,  $J = 6.5$  Hz, 2H), 7.66 (d,  $J = 8.1$  Hz, 2H), 7.56 (s, 2H), 7.50 (s, 4H), 7.30 (d,  $J = 6.7$  Hz, 4H), 7.16 (dt,  $J = 23.3, 7.6$  Hz, 8H), 7.04 (q,  $J = 8.9, 7.7$  Hz, 12H), 6.91 – 6.77 (m, 10H), 5.46 (d,  $J = 15.9$  Hz, 2H), 5.22 (d,  $J = 14.8$  Hz, 2H), 5.00 – 4.91 (m, 4H), 4.37 (d,  $J = 8.9$  Hz, 2H), 3.90 (d,  $J = 14.8$  Hz, 2H), 2.30 (s, 3H), 1.07 (s, 36H);  $^{13}\text{C}$  NMR (101 MHz, Chloroform-*d*)  $\delta$  158.4, 152.2, 142.1, 138.5, 136.5, 135.2, 132.2, 131.4, 131.1, 129.7, 129.6, 129.4, 129.1, 128.3, 128.1, 126.8, 124.5, 123.1, 122.3, 115.8, 71.5, 68.1, 51.7, 49.1, 34.7, 31.2, 21.4;  $^{19}\text{F}$  NMR (377 MHz, Chloroform-*d*)  $\delta$  -62.7; HRMS (+ESI)  $m/z$  [ $\text{C}_{78}\text{H}_{80}\text{F}_{12}\text{N}_5$ ] $^+$ : 1314.6222; found: 1314.6224; HRMS (-ESI)  $m/z$  [ $\text{C}_{12}\text{H}_{11}\text{N}_2\text{O}_2\text{S}$ ] $^-$ : 247.0547; found: 247.0547;  $[\alpha]_{\text{D}}^{23} = -100.25$  ( $c$  0.4,  $\text{CH}_2\text{Cl}_2$ ).

## 5. General procedure and characterisation of asymmetric Steglich rearrangement

### a. General synthetic procedure of Steglich rearrangement substrates

The substrates **3a-3m** were synthesized following reported procedure.<sup>[3-7]</sup> The compound **3c** is reported for the first time.

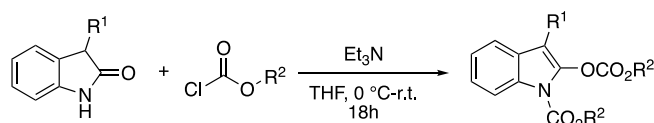

3-substituted oxindole derivative (3 mmol, 1 equiv.) was added in 10 mL distilled THF, then  $\text{Et}_3\text{N}$  (9 mmol, 3 equiv.) was added into the solution. The whole mixture was cooled down to 0 °C in ice bath and the chloroformate (9 mmol, 3 equiv.) was added slowly into the mixture. Then the mixture was warmed up to room temperature and stirred at this temperature overnight. The product was purified and isolated by flash column chromatography (n-hexane : ethyl acetate=10:1 – 4:1).

### b. Characterisation of Steglich rearrangement substrates

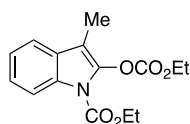

**ethyl 2-((ethoxycarbonyloxy)-3-methyl-1H-indole-1-carboxylate (3c)**: colorless oil;  $^1\text{H}$  NMR (400 MHz, Chloroform-*d*)  $\delta$  8.07 (d,  $J = 8.2$  Hz, 1H), 7.46 (d,  $J = 7.5$  Hz, 1H), 7.35 – 7.21 (m, 2H), 4.46 (q,  $J = 7.1$  Hz, 2H), 4.37 (q,  $J = 7.1$  Hz, 2H), 2.16 (s, 3H);  $^{13}\text{C}$  NMR (101 MHz, Chloroform-*d*)  $\delta$  152.6, 150.4, 137.7, 132.2, 128.1, 124.7, 123.3, 118.9, 115.4, 105.2, 65.8, 63.3, 14.3, 14.3, 7.0; HRMS (ESI) calcd for  $\text{C}_{15}\text{H}_{17}\text{NO}_5$   $m/z$   $[\text{M}+\text{H}]^+$ : 292.1180; found: 292.1180.

## 6. General procedure and characterisation of enantioselective Steglich rearrangement products

### a. General procedure of enantioselective Steglich rearrangement

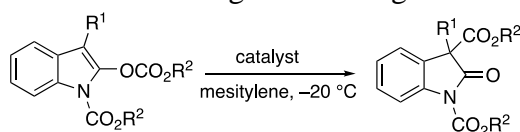

A solution of *O*-acylated oxindole (0.040 mmol, 1 equiv.) and catalyst (0.002 mmol, 5 mol%) in mesitylene (0.4 mL) was cooled to  $-20$  °C and stirred at this temperature for 24 h. The reaction was monitored by TLC (n-hexane : ethyl acetate=4:1) and the mixture was purified by flash column chromatography (n-hexane : ethyl acetate=20:1) after reaction finished.

### b. Characterisation of Steglich rearrangement products

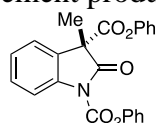

**diphenyl 3-methyl-2-oxindoline-1,3-dicarboxylate (4a)**: white solid; 99% yield;  $^1\text{H}$  NMR (400 MHz, Chloroform-*d*)  $\delta$  8.05 (d,  $J = 8.2$  Hz, 1H), 7.53 – 7.40 (m, 4H), 7.39 – 7.27 (m, 6H), 7.26 – 7.17 (m, 1H), 7.01 – 6.91 (m, 2H), 1.90 (s, 3H);  $^{13}\text{C}$  NMR (101 MHz, Chloroform-*d*)  $\delta$  172.5, 167.7, 150.4, 150.2, 149.4, 139.2, 130.0, 129.8, 129.6, 128.8, 126.7, 126.6, 125.8, 123.1, 121.6, 121.3, 116.1, 56.1, 21.0; HRMS (ESI) calcd for  $\text{C}_{23}\text{H}_{18}\text{NO}_5$   $m/z$   $[\text{M}+\text{H}]^+$ : 388.1180; found: 388.1180;  $[\alpha]_{\text{D}}^{26} = +63.75$  (*c* 0.24,  $\text{CH}_2\text{Cl}_2$ ); HPLC analysis: Chiralcel AD-H (Hex/IPA = 97.5/2.5, 1.0 mL/min, 254 nm, 22°C), 23.8 min, 37.5 min (major), 92% ee.

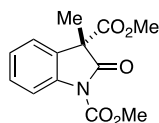

**dimethyl 3-methyl-2-oxindoline-1,3-dicarboxylate (4b)**: white solid; 82% yield;  $^1\text{H}$  NMR (396 MHz, Chloroform-*d*)  $\delta$  7.96 (d,  $J = 8.2$  Hz, 1H), 7.37 (td,  $J = 8.2, 1.5$  Hz, 1H), 7.27 (dd,  $J = 8.1, 1.6$  Hz, 1H), 7.20 (t,  $J = 7.5$  Hz, 1H), 4.04 (s, 3H), 3.66 (s, 3H), 1.73 (s, 3H);  $^{13}\text{C}$  NMR (100 MHz, Chloroform-*d*)  $\delta$  173.3, 169.6, 151.5, 139.3, 129.6, 129.0, 125.4, 123.1, 115.6, 55.7, 54.2, 53.4, 21.0; HRMS (ESI) calcd for  $\text{C}_{13}\text{H}_{14}\text{NO}_5$   $m/z$   $[\text{M}+\text{H}]^+$ : 264.0867; found: 264.0868;  $[\alpha]_{\text{D}}^{23} = +26.13$  (*c* 1.1,  $\text{CH}_2\text{Cl}_2$ ); HPLC analysis: Chiralcel IG-3 (Hex/IPA = 95/5, 1.0 mL/min, 254 nm, 22°C), 15.9 min (major), 16.8 min, 99% ee.

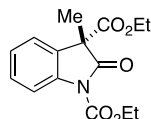

**diethyl 3-methyl-2-oxoindoline-1,3-dicarboxylate (4c):** white solid; 48% yield;  $^1\text{H}$  NMR (400 MHz, Chloroform-*d*)  $\delta$  7.93 (d,  $J = 8.2$  Hz, 1H), 7.38 – 7.34 (m, 1H), 7.30 – 7.24 (m, 1H), 7.19 (td,  $J = 7.5, 1.0$  Hz, 1H), 4.52 – 4.47 (m, 2H), 4.32 – 3.81 (m, 2H), 1.72 (s, 3H), 1.47 (t,  $J = 7.1$  Hz, 3H), 1.15 (t,  $J = 7.1$  Hz, 3H);  $^{13}\text{C}$  NMR (100 MHz, Chloroform-*d*)  $\delta$  173.3, 169.1, 151.0, 139.4, 129.4, 129.2, 125.2, 123.0, 115.6, 63.8, 62.4, 55.8, 21.0, 14.4, 14.0; HRMS (ESI) calcd for  $\text{C}_{15}\text{H}_{17}\text{NO}_5$   $m/z$   $[\text{M}+\text{H}]^+$ : 292.1180; found: 292.1180;  $[\alpha]_{\text{D}}^{23} = +32.43$  ( $c$  1.4,  $\text{CH}_2\text{Cl}_2$ ); HPLC analysis: Amylose-2 (Hex/IPA = 98/2, 1.0 mL/min, 210 nm, 22°C), 15.6 min, 17.5 min (major), 87% ee.

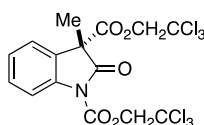

**bis(2,2,2-trichloroethyl) 3-methyl-2-oxoindoline-1,3-dicarboxylate (4d):** white solid; 85% yield;  $^1\text{H}$  NMR (400 MHz, Chloroform-*d*)  $\delta$  8.00 (d,  $J = 8.2$  Hz, 1H), 7.47 – 7.38 (m, 1H), 7.34 (d,  $J = 6.7$  Hz, 1H), 7.23 (d,  $J = 7.5$  Hz, 1H), 5.06 (q,  $J = 11.8$  Hz, 2H), 4.83 – 4.50 (m, 2H), 1.83 (s, 3H);  $^{13}\text{C}$  NMR (101 MHz, Chloroform-*d*)  $\delta$  171.9, 167.2, 149.2, 138.9, 130.1, 128.1, 125.8, 123.6, 115.9, 94.2, 94.2, 75.9, 74.6, 55.7, 20.1; HRMS (ESI) calcd for  $\text{C}_{15}\text{H}_{12}\text{Cl}_6\text{NO}_5$   $m/z$   $[\text{M}+\text{H}]^+$ : 494.8841; found: 494.8842;  $[\alpha]_{\text{D}}^{23} = +35.54$  ( $c$  2.1,  $\text{CH}_2\text{Cl}_2$ ); HPLC analysis: Chiralcel OD-H (Hex/IPA = 90/10, 1.0 mL/min, 210 nm, 22°C), 5.5 min (major), 5.9 min, 73% ee.

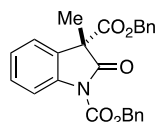

**dibenzyl 3-methyl-2-oxoindoline-1,3-dicarboxylate (4e):** white solid; 97% yield;  $^1\text{H}$  NMR (396 MHz, Chloroform-*d*)  $\delta$  7.92 (d,  $J = 8.2$  Hz, 1H), 7.58 – 7.46 (m, 2H), 7.48 – 7.28 (m, 4H), 7.27 – 7.21 (m, 3H), 7.21 – 7.12 (m, 2H), 7.09 (dd,  $J = 6.5, 3.0$  Hz, 2H), 5.45 (s, 2H), 5.11 (s, 2H), 1.74 (s, 3H);  $^{13}\text{C}$  NMR (100 MHz, Chloroform-*d*)  $\delta$  173.0, 168.8, 150.8, 139.3, 135.3, 135.0, 129.6, 128.8, 128.6, 128.6, 128.3, 128.2, 127.4, 125.2, 123.1, 115.7, 68.9, 67.6, 55.9, 20.7; HRMS (ESI) calcd for  $\text{C}_{25}\text{H}_{22}\text{NO}_5$   $m/z$   $[\text{M}+\text{H}]^+$ : 416.1493; found: 416.1493;  $[\alpha]_{\text{D}}^{23} = +45.14$  ( $c$  1.5,  $\text{CH}_2\text{Cl}_2$ ); HPLC analysis: Chiralcel AD-H (Hex/IPA = 97.5/2.5, 1.0 mL/min, 254 nm, 22°C), 25.0 min (major), 30.1 min, 88% ee.

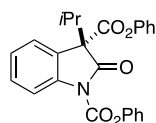

**diphenyl 3-isopropyl-2-oxoindoline-1,3-dicarboxylate (4f):** white solid; 86% yield;  $^1\text{H}$  NMR (400 MHz, Chloroform-*d*)  $\delta$  8.19 (d,  $J = 8.1$  Hz, 1H), 7.83 – 7.57 (m, 1H), 7.50 – 7.18 (m, 17H), 7.15 – 7.04 (m, 2H), 3.27 (hept,  $J = 7.1$  Hz, 1H), 1.46 (d,  $J = 7.1$  Hz, 6H);  $^{13}\text{C}$  NMR (101 MHz, Chloroform-*d*)  $\delta$  170.6, 167.2, 150.5, 150.3, 149.4, 139.8, 129.8, 129.7, 129.6, 126.7, 126.6, 126.5, 125.6, 124.0, 121.7, 121.4, 115.6, 63.9, 36.2, 17.5, 17.2; HRMS (ESI) calcd for  $\text{C}_{25}\text{H}_{22}\text{NO}_5$   $m/z$   $[\text{M}+\text{H}]^+$ : 416.1493; found: 416.1493;  $[\alpha]_{\text{D}}^{23} = -3.05$  ( $c$  1.5,  $\text{CH}_2\text{Cl}_2$ ); HPLC analysis: Chiralcel AD-H (Hex/IPA = 97.5/2.5, 1.0 mL/min, 254 nm, 22°C), 16.2 min (major), 23.9 min, 96% ee.

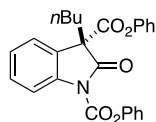

**diphenyl 3-butyl-2-oxoindoline-1,3-dicarboxylate (4g):** white solid; 94% yield;  $^1\text{H}$  NMR (400 MHz, Chloroform-*d*)  $\delta$  8.05 (d,  $J = 8.1$  Hz, 1H), 7.49 – 7.41 (m, 6H), 7.37 – 7.29 (m, 6H), 7.25 – 7.19 (m, 1H), 7.01 – 6.95 (m, 2H), 2.56 – 2.45 (m, 1H), 2.42 – 2.33 (m, 1H), 1.42 – 1.25 (m, 3H), 1.15 – 1.01 (m, 1H), 0.87 (t,  $J = 7.3$  Hz, 3H);  $^{13}\text{C}$  NMR (101 MHz, Chloroform-*d*)  $\delta$  171.9, 167.5, 150.4, 150.2, 149.4, 139.9, 129.9, 129.7, 129.6, 127.0, 126.7, 126.5, 125.8, 123.3, 121.6, 121.3, 115.9, 60.4, 34.8, 25.8, 22.8, 13.8; HRMS (ESI) calcd for  $\text{C}_{26}\text{H}_{24}\text{NO}_5$   $m/z$   $[\text{M}+\text{H}]^+$ : 430.1649; found: 430.1648;  $[\alpha]_{\text{D}}^{26} = +50.29$  ( $c$  0.7,  $\text{CH}_2\text{Cl}_2$ ); HPLC analysis: Chiralcel AD-H (Hex/IPA = 97.5/2.5, 1.0 mL/min, 210 nm, 22°C), 11.9 min, 13.9 min (major), 94% ee.

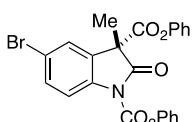

**diphenyl 5-bromo-3-methyl-2-oxoindoline-1,3-dicarboxylate (2h):** white solid; 70% yield;  $^1\text{H}$  NMR (400 MHz, Chloroform-*d*)  $\delta$  7.95 (d,  $J = 8.6$  Hz, 1H), 7.68 – 7.53 (m, 2H), 7.50 – 7.41 (m, 2H), 7.39 – 7.09 (m, 6H), 7.05 – 6.97 (m, 2H), 1.89 (s, 3H).;  $^{13}\text{C}$  NMR (101 MHz, Chloroform-*d*)  $\delta$  171.5, 167.0, 150.0, 138.1, 132.9, 130.5, 129.7, 129.6, 129.2, 126.7, 126.6, 126.2, 125.0, 121.8, 121.4, 121.1, 117.6, 55.8, 20.9; HRMS (ESI) calcd for  $\text{C}_{23}\text{H}_{17}^{79}\text{BrNO}_5$   $m/z$   $[\text{M}+\text{H}]^+$ : 466.0285; found: 466.0284; HRMS (ESI) calcd for  $\text{C}_{23}\text{H}_{17}^{81}\text{BrNO}_5$   $m/z$   $[\text{M}+\text{H}]^+$ : 468.0265; found: 468.0268;  $[\alpha]_{\text{D}}^{23} = +4.17$  ( $c$  0.4,  $\text{CH}_2\text{Cl}_2$ ); HPLC analysis: Chiralcel AD-H (Hex/IPA = 90/10, 1.0 mL/min, 254 nm, 22°C), 10.4 min, 13.0 min (major), 92% ee.

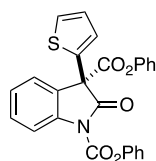

**diphenyl 2-oxo-3-(thiophen-2-yl)indoline-1,3-dicarboxylate (4i):** pale yellow solid; 86% yield;  $^1\text{H}$  NMR (400 MHz, Chloroform-*d*)  $\delta$  8.13 (d,  $J = 8.2$  Hz, 1H), 7.71 (dd,  $J = 7.6, 1.4$  Hz, 1H), 7.55 (td,  $J = 7.9, 1.4$  Hz, 1H), 7.48 – 7.27 (m, 9H), 7.25 – 7.18 (m, 2H), 7.13 – 6.98 (m, 3H);  $^{13}\text{C}$  NMR (101 MHz, Chloroform-*d*)  $\delta$  169.3, 166.3, 150.5, 150.2, 149.4, 139.8, 136.8, 130.9, 129.8, 129.7, 128.4, 127.4, 127.2, 126.8, 126.7, 125.9, 125.3, 121.6, 121.2, 116.3, 115.4, 61.5; HRMS (ESI) calcd for  $\text{C}_{26}\text{H}_{18}\text{NO}_5\text{S}$   $m/z$   $[\text{M}+\text{H}]^+$ : 456.0900; found: 456.0902;  $[\alpha]_{\text{D}}^{23} = +47.06$  ( $c$  0.5,  $\text{CH}_2\text{Cl}_2$ ); HPLC analysis: Chiralcel AD-H (Hex/IPA = 97.5/2.5, 1.0 mL/min, 215 nm, 22°C), 20.9 min, 27.0 min (major), 98% ee.

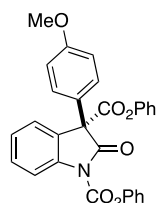

**diphenyl 3-(4-methoxyphenyl)-2-oxoindoline-1,3-dicarboxylate (4j):** white solid; 95% yield;  $^1\text{H}$  NMR (400 MHz, Chloroform-*d*)  $\delta$  8.14 (d,  $J = 8.3$  Hz, 1H), 7.63 (dd,  $J = 7.6, 1.3$  Hz, 1H), 7.55 (td,  $J = 8.0, 1.4$  Hz, 1H), 7.46 – 7.32 (m, 7H), 7.32 – 7.20 (m, 4H), 7.05 – 7.01 (m, 2H), 6.96 – 6.90 (m, 2H), 3.81 (s, 3H);  $^{13}\text{C}$  NMR (100 MHz, Chloroform-*d*)  $\delta$  170.4, 167.5, 160.2, 150.6, 150.2, 149.5, 140.2, 130.6, 129.7, 129.6, 127.0, 126.7, 126.6, 125.9, 125.8, 121.6, 121.2, 116.3, 114.4, 64.1, 55.5; HRMS (ESI) calcd for  $\text{C}_{29}\text{H}_{22}\text{NO}_6$   $m/z$   $[\text{M}+\text{H}]^+$ : 480.1442; found: 480.1443;  $[\alpha]_{\text{D}}^{26} = +128.98$  ( $c$  1.9,  $\text{CH}_2\text{Cl}_2$ ); HPLC analysis: Chiralcel IG-3 (Hex/IPA = 90/10, 1.0 mL/min, 254 nm, 22°C), 38.4 min, 40.9 min (major), 91% ee.

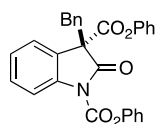

**diphenyl 3-benzyl-2-oxoindoline-1,3-dicarboxylate (4k):** white solid; 96% yield;  $^1\text{H}$  NMR (400 MHz, Chloroform-*d*)  $\delta$  7.78 (d,  $J = 7.9$  Hz, 1H), 7.51 (d,  $J = 7.2$  Hz, 1H), 7.47 – 7.25 (m, 13H), 7.26 – 7.06 (m, 2H), 7.02 (d,  $J = 8.2$  Hz, 2H), 6.93 (d,  $J = 6.6$  Hz, 1H), 3.85 – 3.64 (m, 2H);  $^{13}\text{C}$  NMR (100 MHz, Chloroform-*d*)  $\delta$  171.3, 167.3, 150.4, 150.1, 148.9, 139.9, 133.5, 130.2, 130.0, 129.7, 129.6, 128.2, 127.5, 126.7, 126.6, 126.3, 125.5, 123.7, 121.6, 121.3, 115.8, 61.8, 41.1; HRMS (ESI) calcd for  $\text{C}_{29}\text{H}_{22}\text{NO}_5$   $m/z$   $[\text{M}+\text{H}]^+$ : 464.1493; found: 464.1493;  $[\alpha]_{\text{D}}^{26} = +21.69$  (*c* 1.5,  $\text{CH}_2\text{Cl}_2$ ); HPLC analysis: Chiralcel IE (Hex/IPA = 90/10, 1.0 mL/min, 215 nm, 22°C), 12.8 min, 15.4 min (major), 96% ee.

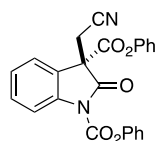

**diphenyl 3-(cyanomethyl)-2-oxoindoline-1,3-dicarboxylate (4l):** pale yellow solid; 90% yield;  $^1\text{H}$  NMR (400 MHz, Chloroform-*d*)  $\delta$  8.12 (d,  $J = 8.0$  Hz, 1H), 7.69 – 7.52 (m, 2H), 7.50 – 7.19 (m, 9H), 7.05 – 6.94 (m, 2H), 3.59 – 3.23 (m, 2H);  $^{13}\text{C}$  NMR (101 MHz, Chloroform-*d*)  $\delta$  169.4, 165.3, 150.1, 148.9, 140.1, 131.5, 129.9, 129.8, 127.0, 127.0, 126.4, 124.1, 123.4, 121.5, 121.0, 116.7, 115.4, 114.9, 56.8, 23.4; HRMS (ESI) calcd for  $\text{C}_{24}\text{H}_{17}\text{N}_2\text{O}_5$   $m/z$   $[\text{M}+\text{H}]^+$ : 413.1132; found: 413.1132;  $[\alpha]_{\text{D}}^{26} = +50.60$  (*c* 0.7,  $\text{CH}_2\text{Cl}_2$ ); HPLC analysis: Chiralcel IG-3 (Hex/IPA = 90/10, 1.0 mL/min, 210 nm, 22°C), 29.1 min, 33.1 min (major), 92% ee.

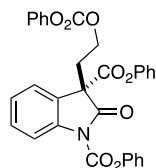

**diphenyl 2-oxo-3-(2-((phenoxy carbonyl)oxy)ethyl)indoline-1,3-dicarboxylate (4m):** white solid; 67% yield;  $^1\text{H}$  NMR (400 MHz, Chloroform-*d*)  $\delta$  8.13 (d,  $J = 8.2$  Hz, 1H), 7.56 – 7.47 (m, 1H), 7.43 (d,  $J = 7.4$  Hz, 1H), 7.38 – 7.17 (m, 12H), 7.09 (s, 2H), 6.98 (d,  $J = 8.1$  Hz, 2H), 4.44 (dt,  $J = 9.1, 5.0$  Hz, 1H), 4.01 (td,  $J = 10.9, 4.5$  Hz, 1H), 3.14 (ddd,  $J = 15.8, 10.6, 5.6$  Hz, 1H), 2.85 (dt,  $J = 14.9, 4.1$  Hz, 1H);  $^{13}\text{C}$  NMR (100 MHz, Chloroform-*d*)  $\delta$  171.7, 167.1, 153.2, 151.0, 150.4, 150.2, 146.5, 140.4, 130.6, 129.6, 129.6, 129.6, 126.7, 126.6, 126.3, 125.9, 125.2, 123.4, 121.6, 116.5, 64.1, 58.5, 33.0; HRMS (ESI) calcd for  $\text{C}_{31}\text{H}_{24}\text{NO}_8$   $m/z$   $[\text{M}+\text{H}]^+$ : 538.1497; found: 538.1497;  $[\alpha]_{\text{D}}^{26} = +43.55$  (*c* 2.0,  $\text{CH}_2\text{Cl}_2$ ); HPLC analysis: Chiralcel AD-H (Hex/IPA = 90/10, 1.0 mL/min, 254 nm, 22°C), 38.4 min, 41.7 min (major), 97% ee.

**7. Table S1. Proof of concept experiments to apply chiral ion pair catalyst in enantioselective Steglich rearrangement of oxindole derivatives<sup>[a]</sup>**

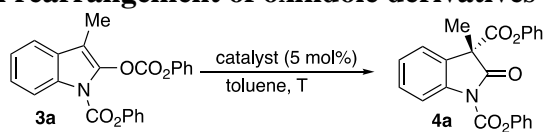

| entry | catalyst            | T      | yield <sup>[b]</sup> | ee <sup>[c]</sup> |
|-------|---------------------|--------|----------------------|-------------------|
| 1     | <b>1a-Cl</b>        | r.t.   | -                    | -                 |
| 2     | <b>H-2a</b>         | r.t.   | -                    | -                 |
| 3     | <b>1a-Cl, DMAP</b>  | r.t.   | 39%                  | 0%                |
| 4     | <b>TBAB, Na-2a</b>  | r.t.   | 38%                  | -                 |
| 5     | <b>1a-Cl, Na-2a</b> | r.t.   | 8%                   | 7%                |
| 6     | <b>1a-2a</b>        | r.t.   | 99%                  | 0%                |
| 7     | <b>1a-2a</b>        | -20 °C | 74%                  | 87%               |

[a] Reaction condition: **3a** (0.04 mmol, 1.0 equiv.), catalyst (5 mol%), and solvent (0.4 mL) at room temperature for 24 h. [b] Isolated yield. [c] Determined by chiral HPLC analysis.

**8. 2D NOESY and 2D ROESY spectra for catalyst 1a-2f**

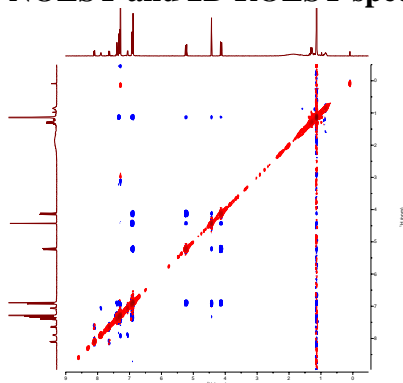

**Figure S1.** 2D ROESY spectrum of pentanidium ion pair **1a-2f** (room temperature, chloroform-*d*,  $\tau_m = 0.2$  s)

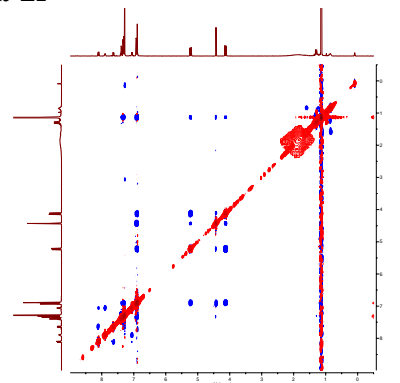

**Figure S2.** 2D NOESY spectrum of pentanidium ion pair **1a-2f** (room temperature, chloroform-*d*,  $\tau_m = 0.5$  s)

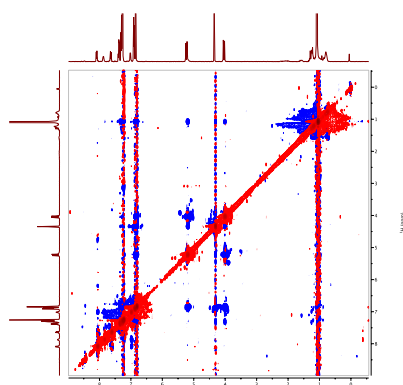

**Figure S3.** 2D ROESY spectrum of pentanidium ion pair **1a-2f** (-20 °C, chloroform-*d*,  $\tau_m = 0.2$  s)

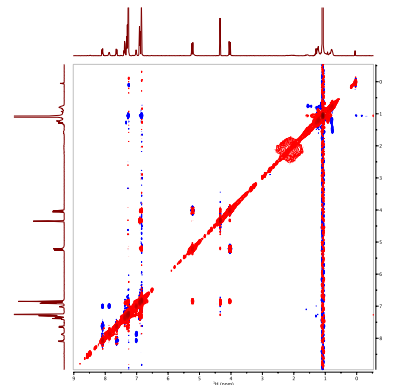

**Figure S4.** 2D NOESY spectrum of pentanidium ion pair **1a-2f** (-20 °C chloroform-*d*,  $\tau_m = 0.5$  s)

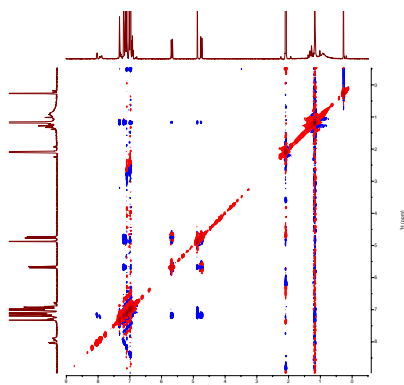

**Figure S5.** 2D ROESY spectrum of pentanidium ion pair **1a-2f** (room temperature, toluene-*d*<sub>8</sub>,  $\tau_m = 0.2$  s)

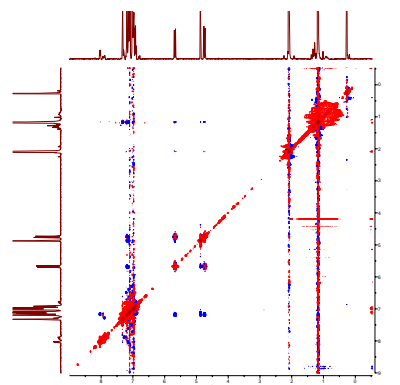

**Figure S6.** 2D NOESY spectrum of pentanidium ion pair **1a-2f** (room temperature, toluene-*d*<sub>8</sub>,  $\tau_m = 0.5$  s)

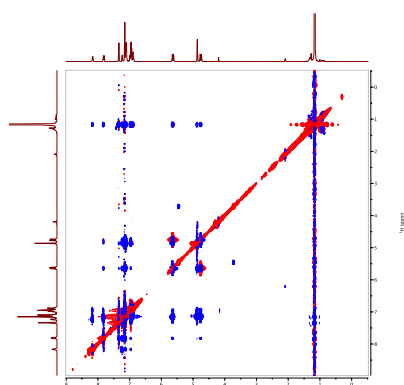

**Figure S7.** 2D ROESY spectrum of pentanidium ion pair **1a-2f** ( $-20$  °C, toluene-*d*<sub>8</sub>,  $\tau_m = 0.2$  s)

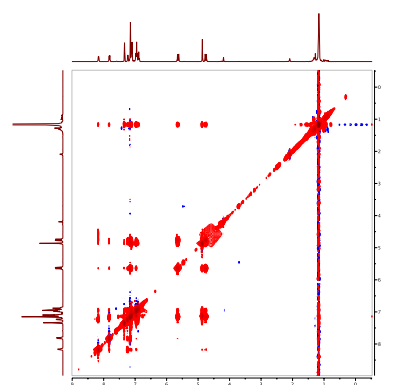

**Figure S8.** 2D NOESY spectrum of pentanidium ion pair **1a-2f** ( $-20$  °C, toluene-*d*<sub>8</sub>,  $\tau_m = 0.5$  s)

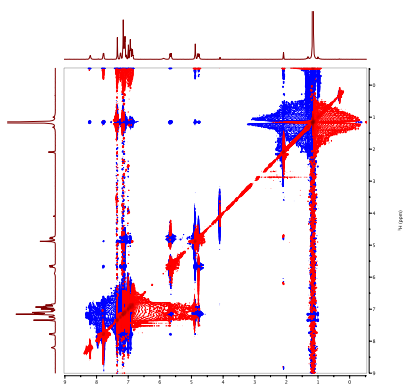

**Figure S9.** 2D ROESY spectrum of pentanidium ion pair **1a-2f** ( $-40$  °C, toluene-*d*<sub>8</sub>,  $\tau_m = 0.2$  s)

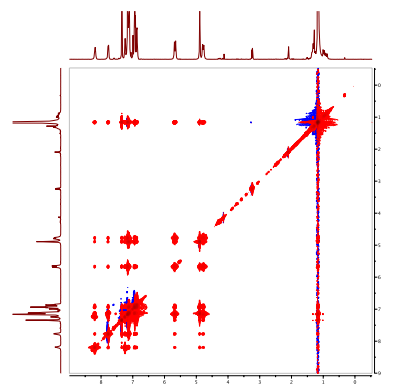

**Figure S10.** 2D NOESY spectrum of pentanidium ion pair **1a-2f** ( $-40$  °C, toluene-*d*<sub>8</sub>,  $\tau_m = 0.5$  s)

## 9. Computational details

All calculations are performed with ORCA 5.0<sup>[8]</sup> (5.0.4 for all calculations which involve the DFT-D4 corrections and 5.0.3 or 5.0.4 for all calculations which do not). Conformation sampling was performed with CREST<sup>[9]</sup> using GFN2-XTB<sup>[10]</sup> method to evaluate the required energies and forces. For all stationary points that are optimized at ALPB(toluene)/GFN2-XTB:r<sup>2</sup>SCAN-3c<sup>[11]</sup>, numerical frequencies were calculated to characterize the stationary

points. Selected geometries are optimized at CPCM(toluene)/r<sup>2</sup>SCAN-3c, for these stationary points. Intrinsic reaction coordinates were performed on key TS structures to confirm that the minimum energy path traversed by the TS correspond to the required elementary step.

IGMplot 3.0.3 was used to calculate the isosurfaces.<sup>[12]</sup> VMD<sup>[13]</sup> was used to produce the isosurface together with the corresponding 3D models of the complexes.

*Examples of relevant ORCA 5 keywords in input file:*

#### QM/QM2 geometry optimization

```
!QMMM
!QM/QM2 optTS verytightopt r2scan-3c verytightscf
%qmmm
  QMAtoms {211:284} end
  Charge_Total 0
  Mult_Total 1
  QM2CustomFile "/scratch/QM2method.txt"
end
```

```
!QMMM
!QM/QM2 opt verytightopt r2scan-3c verytightscf
%qmmm
  QMAtoms {211:284} end
  Charge_Total 0
  Mult_Total 1
  QM2CustomFile "/scratch/QM2method.txt"
end
```

#### QM2 Numerical Frequency

```
!QMMM
!QM/QM2 opt verytightopt r2scan-3c verytightscf
%qmmm
  QMAtoms {211:284} end
  Charge_Total 0
  Mult_Total 1
  QM2CustomFile "/scratch/QM2method.txt"
end
```

#### QM/QM2 Molecular Dynamics

```
!QM/QM2 r2scan-3c verytightscf
!MD
%qmmm
  QMAtoms {211:238} end
  Charge_Total 0
  Mult_Total 1
  QM2CustomFile "/scratch/QM2method.txt"
end
%md
  SCFlog last
  Timestep 0.5_fs
  Initvel 278_K No_overwrite
  Thermostat NHC 278_K Timecon 25.0_fs
```



```
Dump Position Stride 4 Filename "/scratch/trajectory.xyz"
Restart IfExists
Run 1000 Centercom
end
```

### QM2method.txt

```
!XTB ALPB(toluene)
%XTB
XTBINPUTSTRING "--acc 0.0001"
end
```

### r<sup>2</sup>SCAN-3c optimization

```
!opt verytightopt r2scan-3c verytightscf
```

### r<sup>2</sup>SCAN-3c numerical frequency

```
!NumFreq r2scan-3c verytightscf
%Freq
    Temp 253.15
end
```

### CPCM/r<sup>2</sup>SCAN-3c optimization

```
!optTS verytightopt verytightscf r2scan-3c CPCM(toluene) soscf notrah defgrid3
%geom
    UseGDIIS False
    MaxIter 300
    GDIISMaxEq 20
    InHess read
    InHessName "run.Hess.grid2.CPCM.r2scan-3c.hess"
    Trust 0.2
    TS_Active_Atoms {217 225} end
    TS_Active_Atoms_Factor 1.5
    ENFORCESTRICTCONVERGENCE True
end
```

```
!opt verytightopt verytightscf r2scan-3c CPCM(toluene) soscf notrah defgrid3
%geom
    MaxIter 300
    Trust 0.3
end
```

### CPCM/r<sup>2</sup>SCAN-3c frequency

```
!AnFreq verytightscf r2scan-3c CPCM(toluene) soscf notrah defgrid3
%Freq
    Temp 253.15
end
```

### Single point calculations

```
!M062X def2-tzvpp RIJCOSX VeryTightSCF autoaux defgrid3
!wB97M-V def2-tzvpp RIJCOSX VeryTightSCF autoaux
```

## 10. Supplementary computational results

### Achiral nucleophilic catalysts calculations

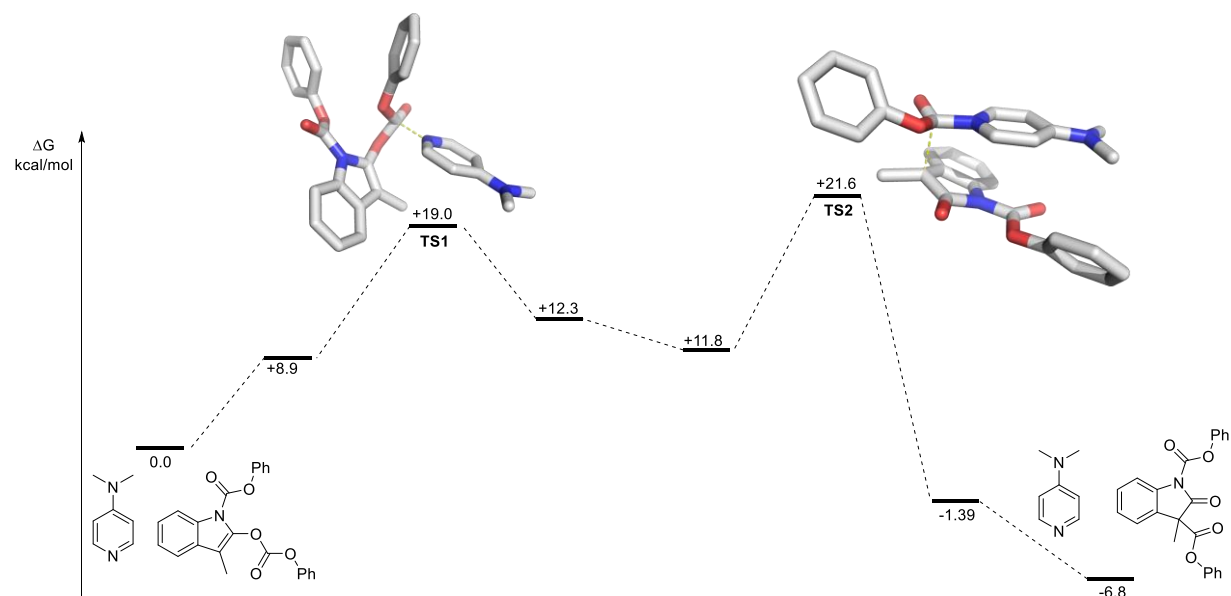

Figure S11. Free energy profile of DMAP catalyzed Steglich Rearrangement. Values are calculated at SMD(Toluene)/M06-2X/def2-TZVPP//CPCM(toluene)/r<sup>2</sup>SCAN-3c. Thermochemical correction to the Gibbs free energy is calculated at 253.15K and 1 atm.

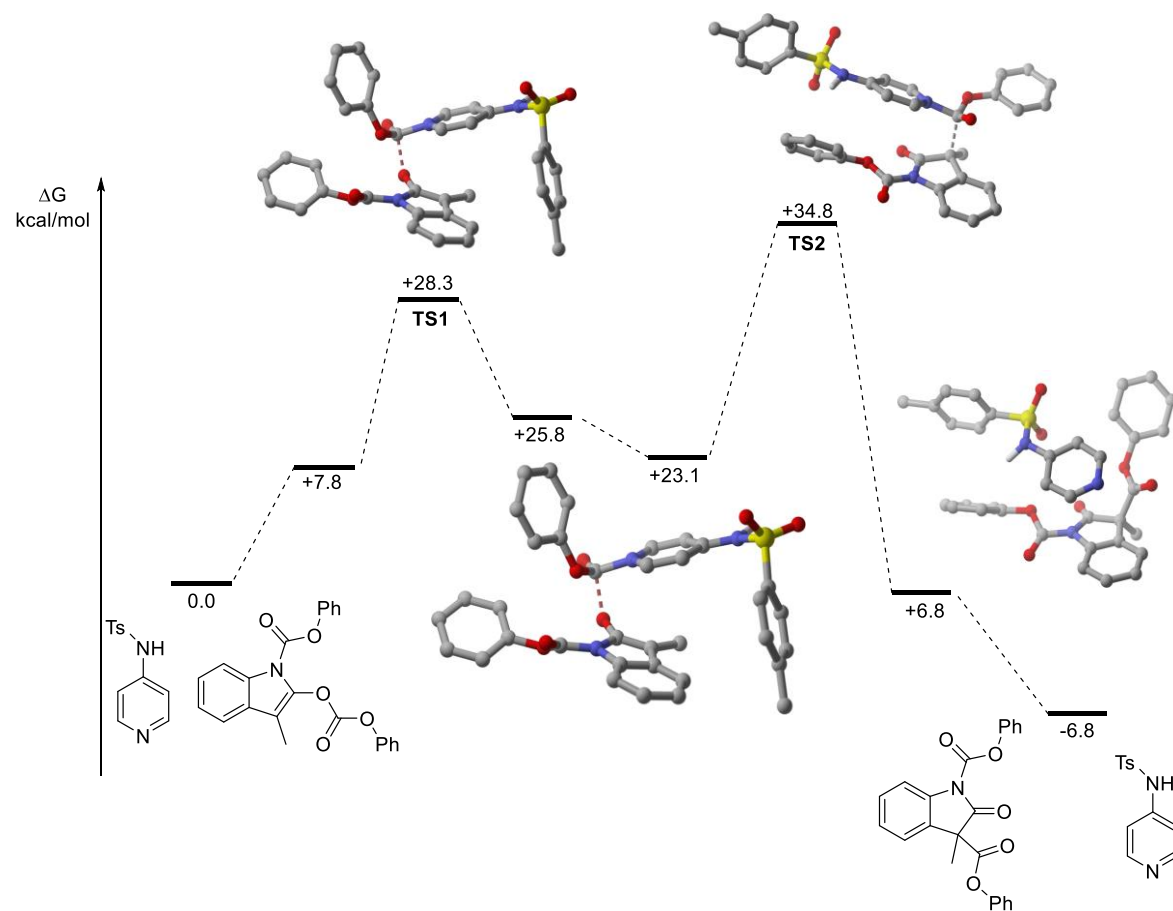

Figure S12. Free energy profile of **H-2a** catalyzed Steglich Rearrangement. Values are calculated at SMD(Toluene)/M06-2X/def2-TZVPP//CPCM(toluene)/r<sup>2</sup>SCAN-3c. Thermochemical correction to the Gibbs free energy is calculated at 253.15K and 1 atm.

Table S2. Turnover Frequency from energy profiles shown above.

|      | TOF <sub>298.15K</sub> (h <sup>-1</sup> ) |
|------|-------------------------------------------|
| DMAP | 2.75                                      |
| H-2a | 6.9×10 <sup>-10</sup>                     |

TOF is calculated with AUTOTOFF 0.9.1 excel.<sup>[14]</sup>

### Post-processing of MD results.

Molecular dynamics simulations with ORCA were performed with the following workflow.

1. Equilibrate the optimized geometries at 253K for 1 ps (0.5fs/step)
2. Production for 20 ps (0.5fs/step) run to collect the data.

The details can be found in the ORCA input section above. The PYTHON script used to post-process the MD trajectories is attached as a jupyter notebook in the supplementary file.

Relevant MD trajectories are available from the authors as requested. They are not included due to their large size (2.19GB in total).

### Entropy contribution to $\Delta\Delta G^\ddagger$

Table S3. Entropy contribution to  $\Delta\Delta G^\ddagger$

| Transition state structures optimized at      | $-T\Delta\Delta S^\ddagger$ (kcal/mol) |
|-----------------------------------------------|----------------------------------------|
| ALPB(toluene)/GFN2-XTB:r <sup>2</sup> SCAN-3c | +0.80                                  |
| CPCM(toluene)/r <sup>2</sup> SCAN-3c          | +0.68                                  |

Please refer to spreadsheet “ee.xlsx” in SI\_coordinates\_and\_data\CPCM\_r2SCAN-3c\1a-2f for details.

## 11. The Optimization of Reaction Conditions

### N-Protecting group:

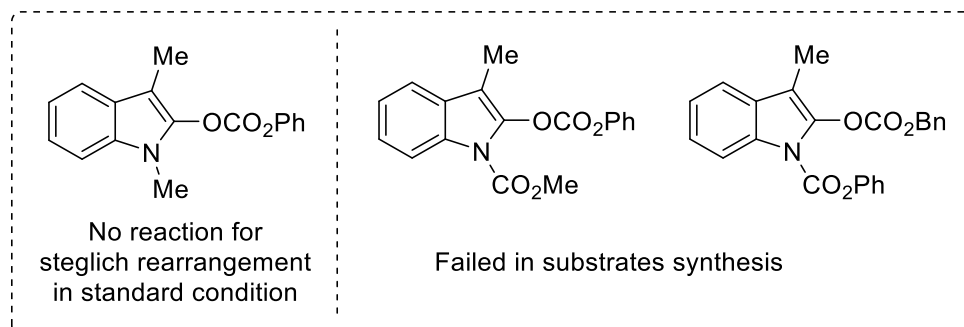

### Optimization of temperature <sup>a</sup>

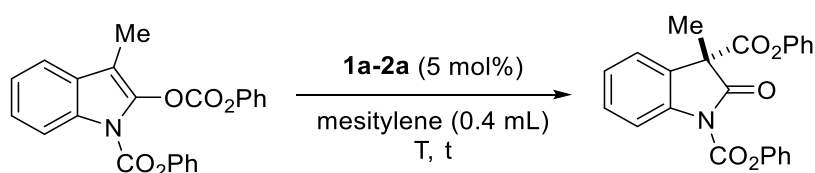

| T (°C) | t (h) | yield (%) <sup>b</sup> | ee (%) <sup>c</sup> |
|--------|-------|------------------------|---------------------|
| 0      | 24 h  | 81                     | 86                  |
| -20    | 24 h  | 99                     | 92                  |
| -40    | 24 h  | N.R.                   | -                   |
| -40    | 48 h  | N.R.                   | -                   |

<sup>a</sup> Reaction condition: **3a** (0.04 mmol, 1.0 equiv.), catalyst (5 mol%), and solvent (0.4 mL) at T °C for t h. <sup>b</sup> Isolated yield. <sup>c</sup> Determined by chiral HPLC analysis.

### Results for **4j**, **4k**, **4l**, **4m** using **1a-2a** as catalyst (standard condition)

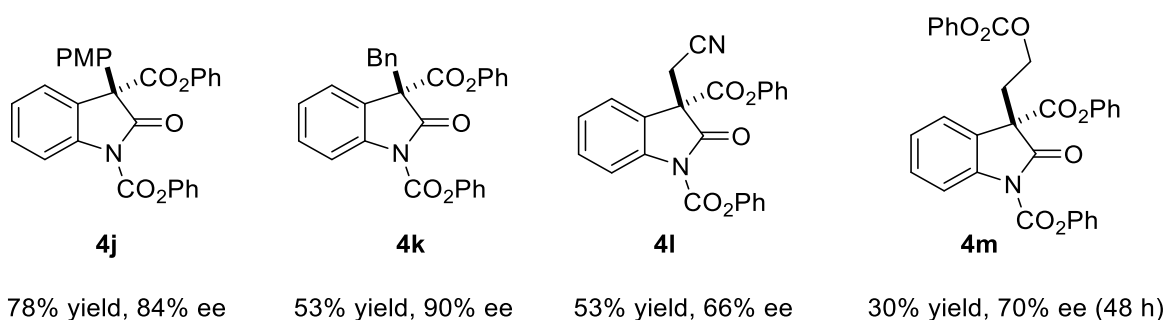

### Optimization of catalysts for **4l** <sup>a</sup>

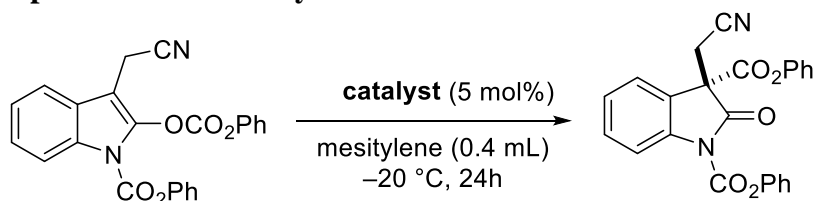

| catalyst     | yield (%) <sup>b</sup> | ee (%) <sup>c</sup> |
|--------------|------------------------|---------------------|
| <b>1a-2a</b> | 53                     | 66                  |
| <b>1a-2c</b> | 20                     | 50                  |
| <b>1a-2e</b> | 24                     | 67                  |

|              |    |    |
|--------------|----|----|
| <b>1a-2f</b> | 90 | 92 |
| <b>1a-2g</b> | 12 | 40 |

---

<sup>a</sup> Reaction condition: **31** (0.04 mmol, 1.0 equiv.), catalyst (5 mol%), and solvent (0.4 mL) at -20 °C for 24 h. <sup>b</sup> Isolated yield. <sup>c</sup> Determined by chiral HPLC analysis.

## Reference

- [1] X. Zhang, J. Ren, S. M. Tan, D. Tan, R. Lee, C.-H. Tan, *Science* **2019**, *363*, 400–404.
- [2] J. Helberg, T. Ampßler, H. Zipse, *J. Org. Chem.* **2020**, *85*, 5390–5402.
- [3] S. A. Shaw, P. Aleman, J. Christy, J. W. Kampf, P. Va, E. Vedejs, *J. Am. Chem. Soc.* **2006**, *128*, 925–934.
- [4] H. Mandai, T. Fujiwara, K. Noda, K. Fujii, K. Mitsudo, T. Korenaga, S. Suga, *Org. Lett.* **2015**, *17*, 4436–4439.
- [5] H. Mandai, K. Fujii, H. Yasuhara, K. Abe, K. Mitsudo, T. Korenaga, S. Suga, *Nat Commun* **2016**, *7*, 11297.
- [6] M. Shan, T. Liang, Y.-F. Zhang, M.-S. Xie, G.-R. Qu, H.-M. Guo, *Org. Chem. Front.* **2019**, *6*, 3874–3878.
- [7] Y.-P. Lam, J. Huang, X. Jiang, Y.-Y. Yeung, *ChemCatChem* **2022**, *14*, e202200136.
- [8] F. Neese, *WIREs Comput Mol Sci.* **2022**, e1606.
- [9] P. Pracht, F. Bohle, S. Grimme, *Phys. Chem. Chem. Phys.* **2020**, *22*, 7169–7192.
- [10] C. Bannwarth, S. Ehlert, S. Grimme, *J. Chem. Theory Comput.* **2019**, *15*, 1652–1671.
- [11] S. Grimme, A. Hansen, S. Ehlert, J.-M. Mewes, *J. Chem. Phys.* **2021**, *154*, 064103.
- [12] C. Lefebvre, J. Klein, H. Khartabil, J.-C. Boisson, E. Hénon, *J. Comput. Chem.* **2023**, DOI 10.1002/jcc.27123.
- [13] W. Humphrey, A. Dalke, K. Schulten, *J. Mol. Graph.* **1996**, *14*, 33–38.
- [14] S. Kozuch, *WIREs Comput Mol Sci.* **2012**, *2*, 795–815.

# NMR spectra

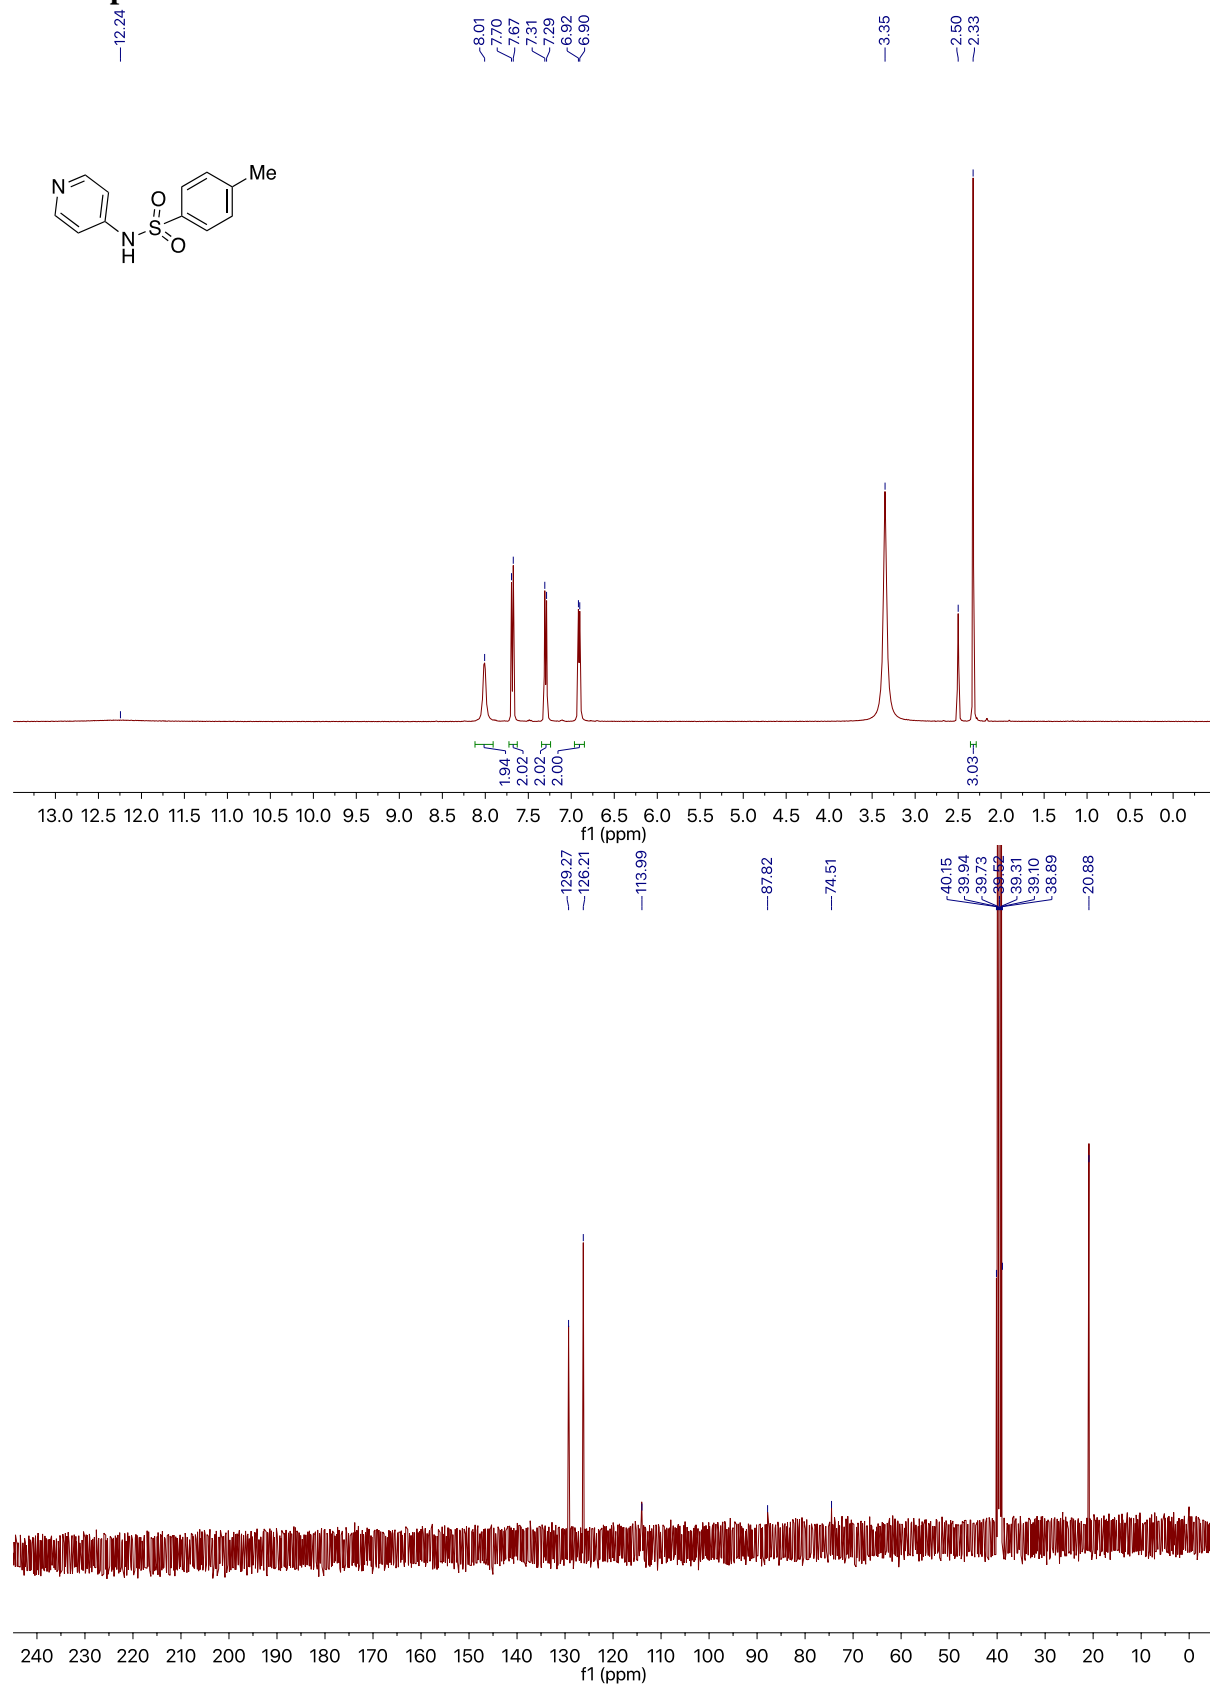

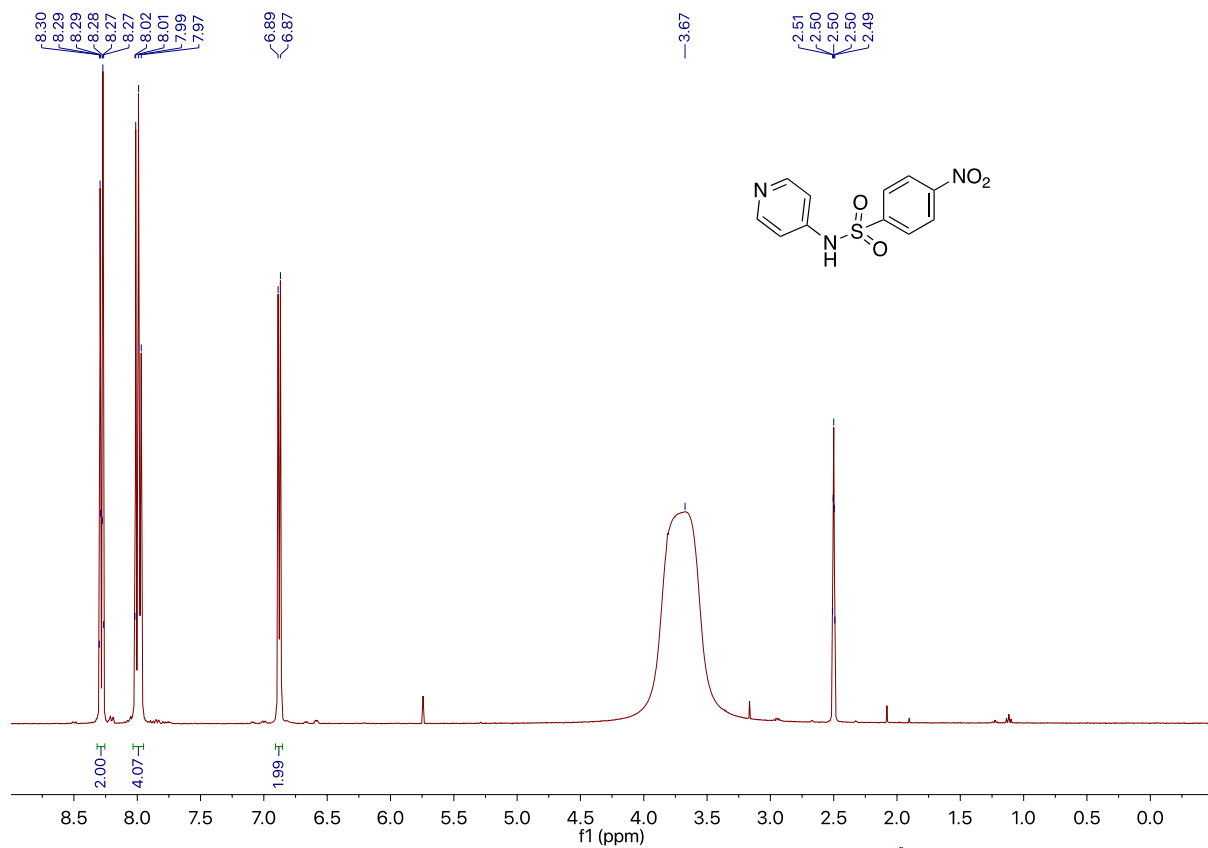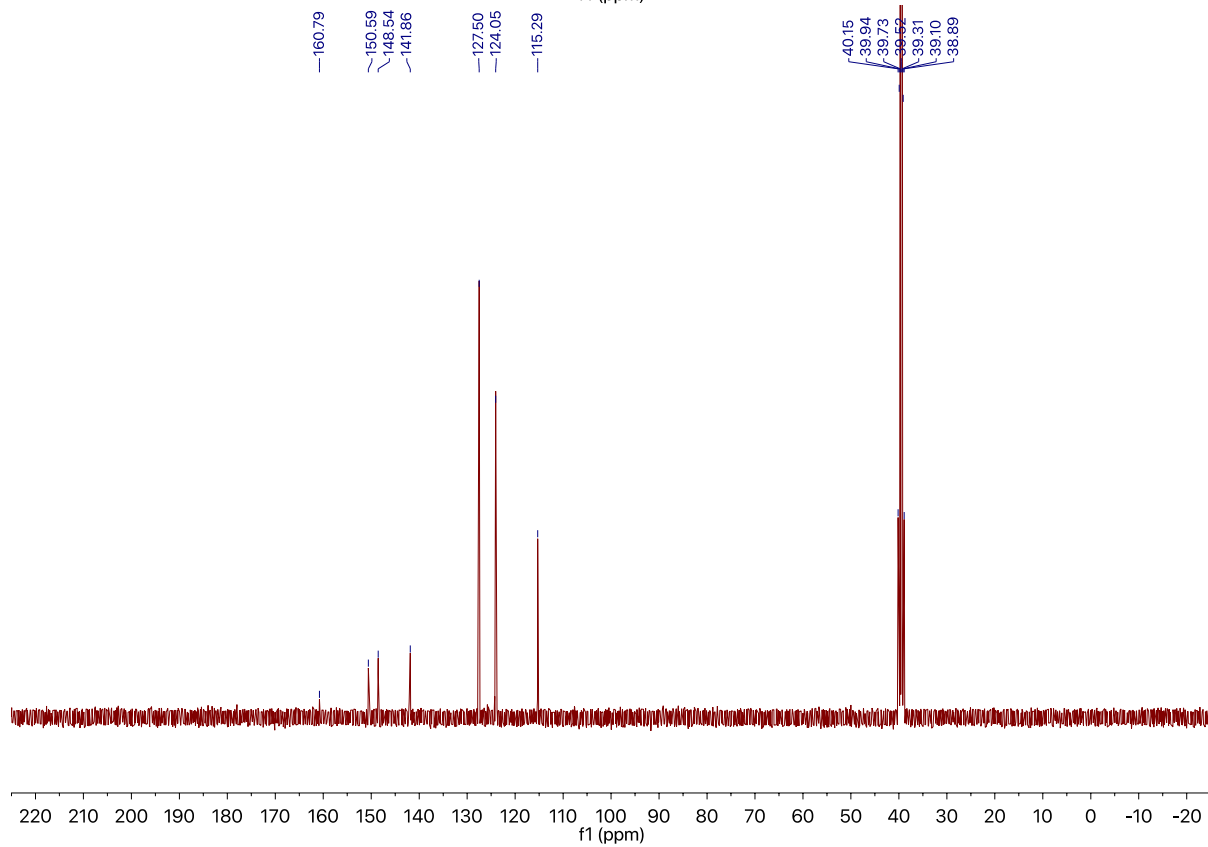



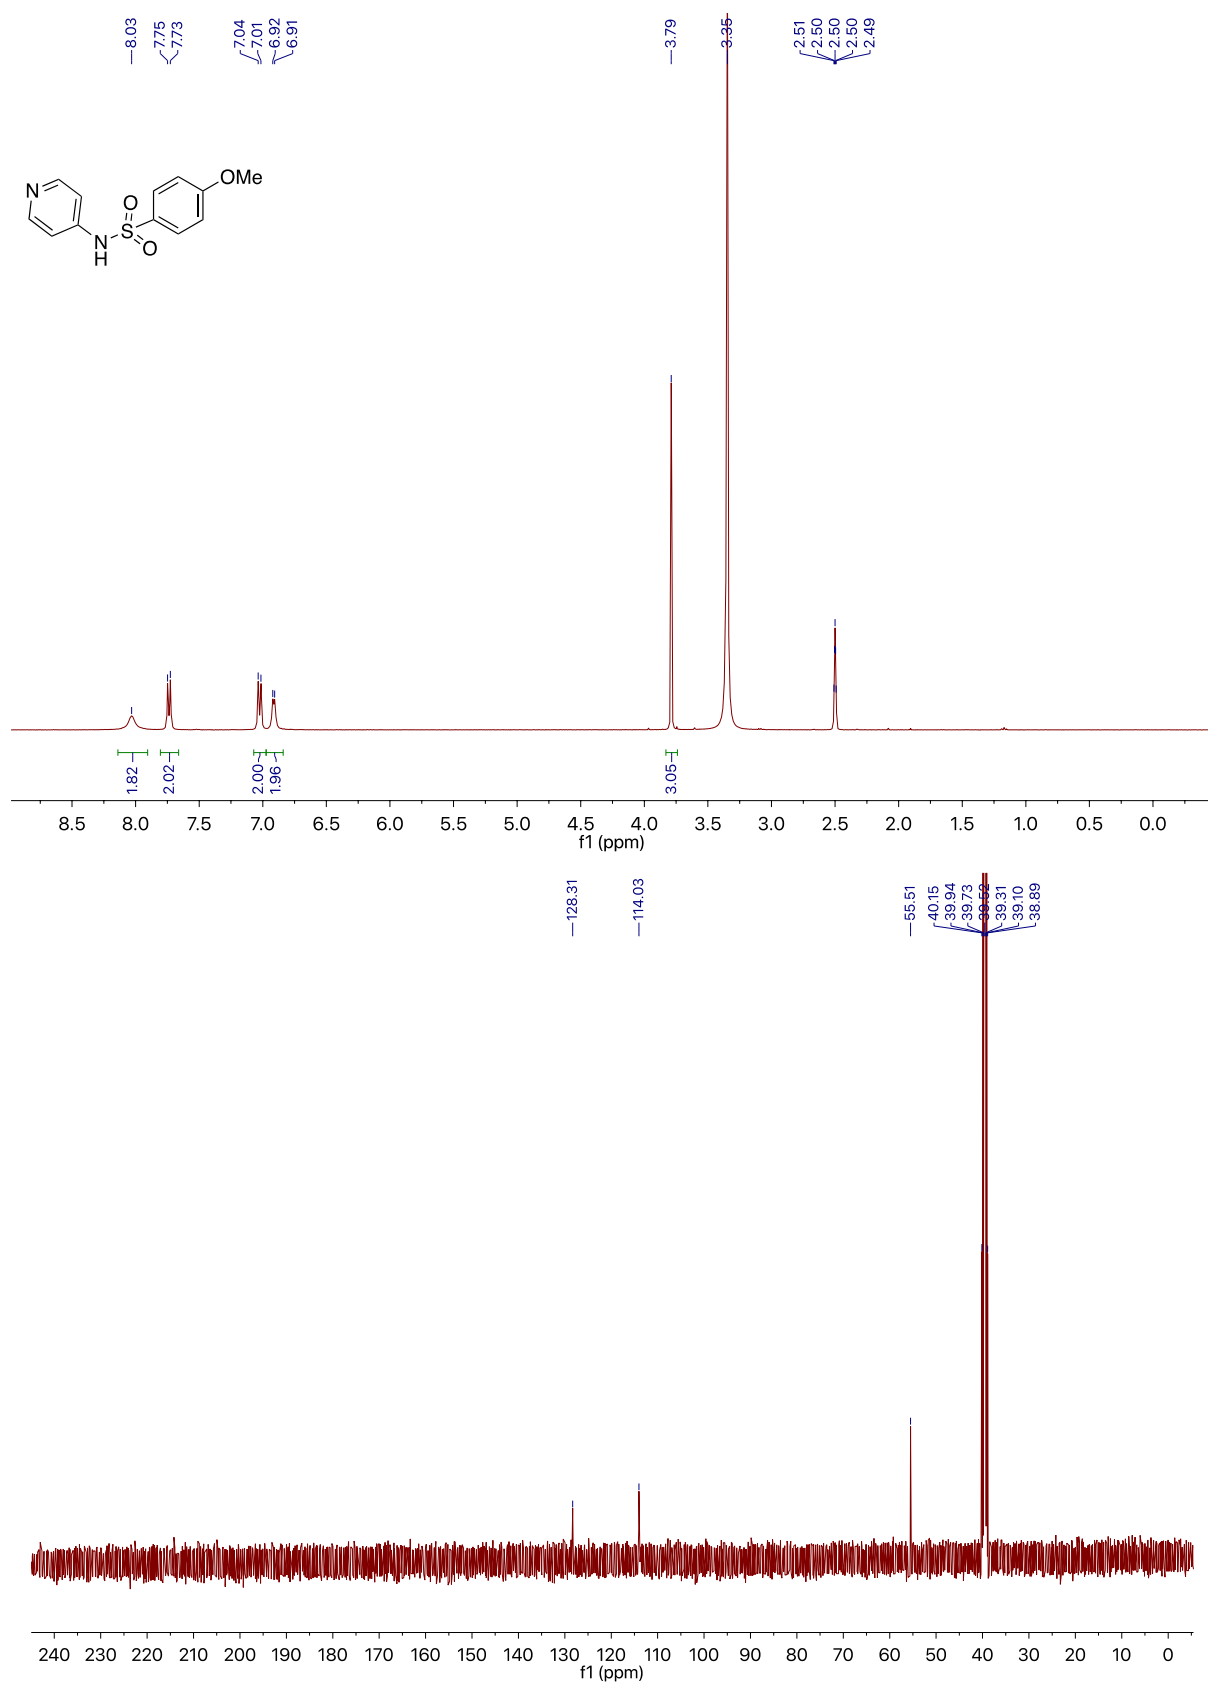

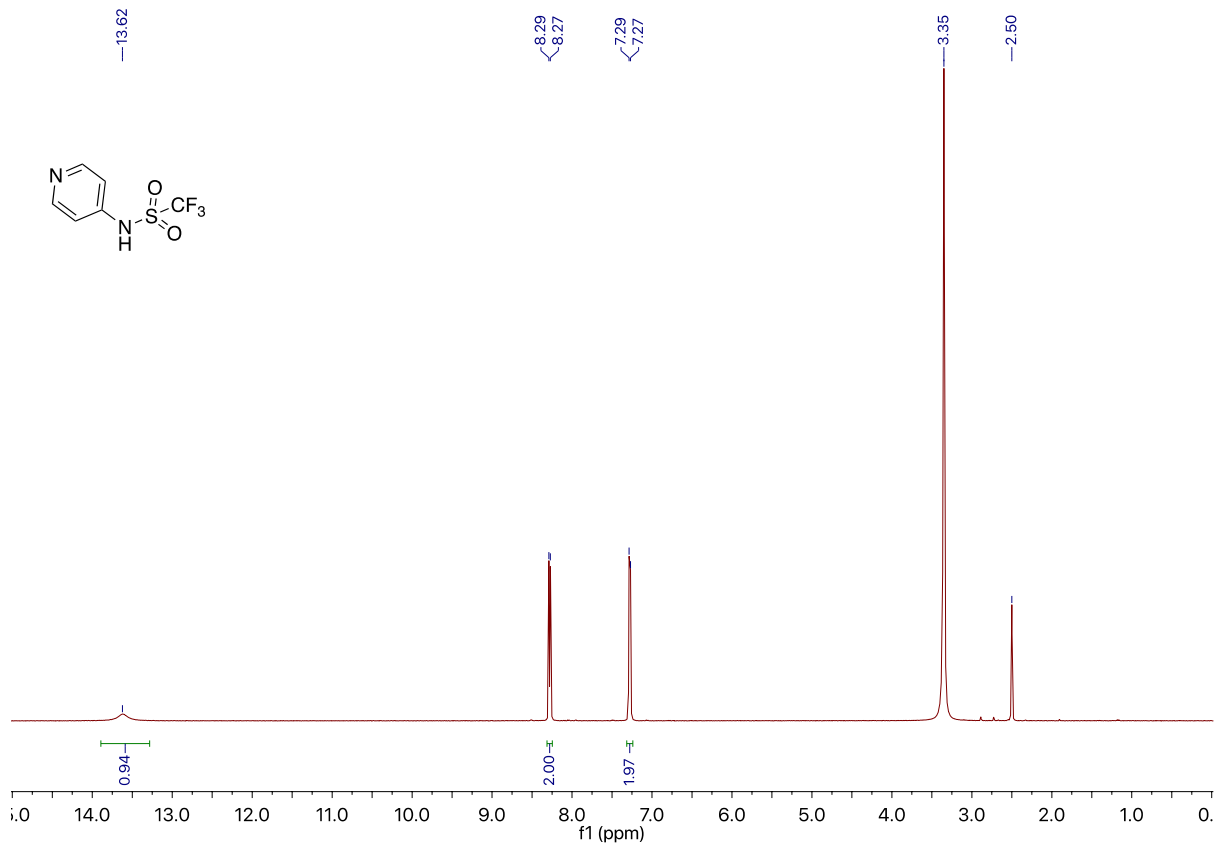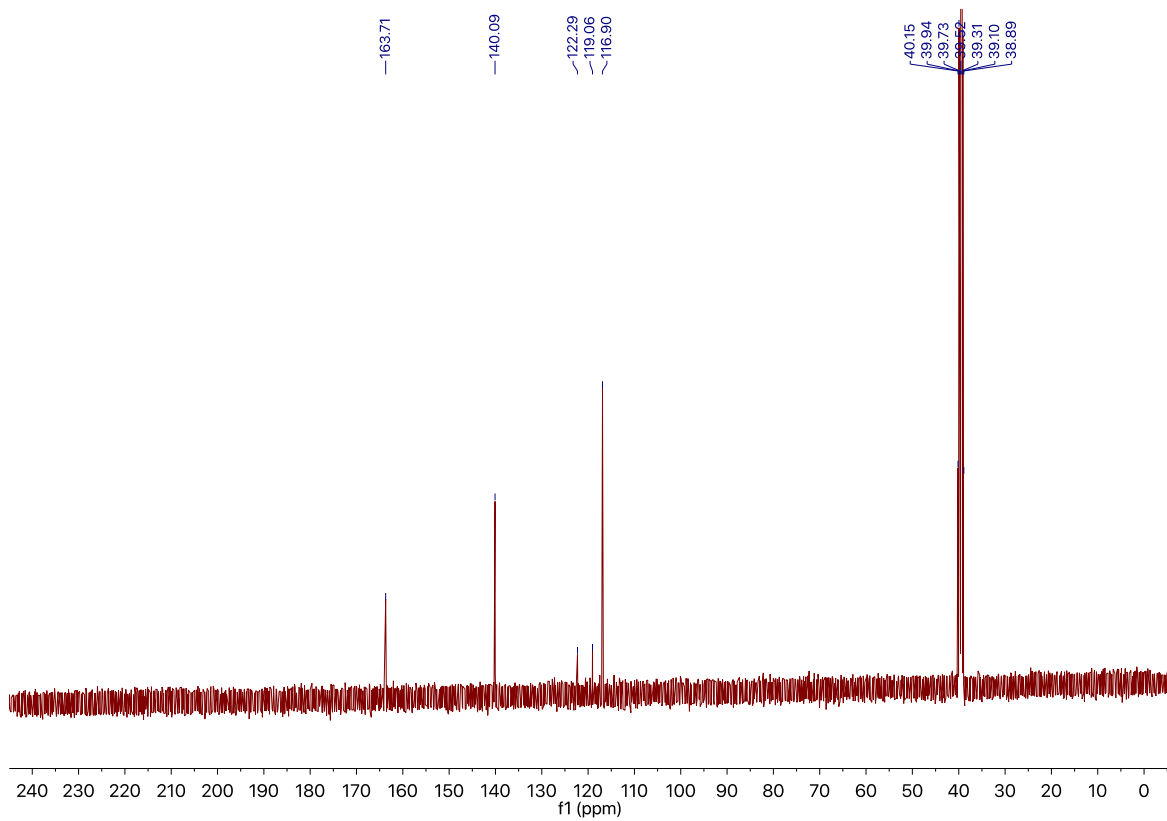

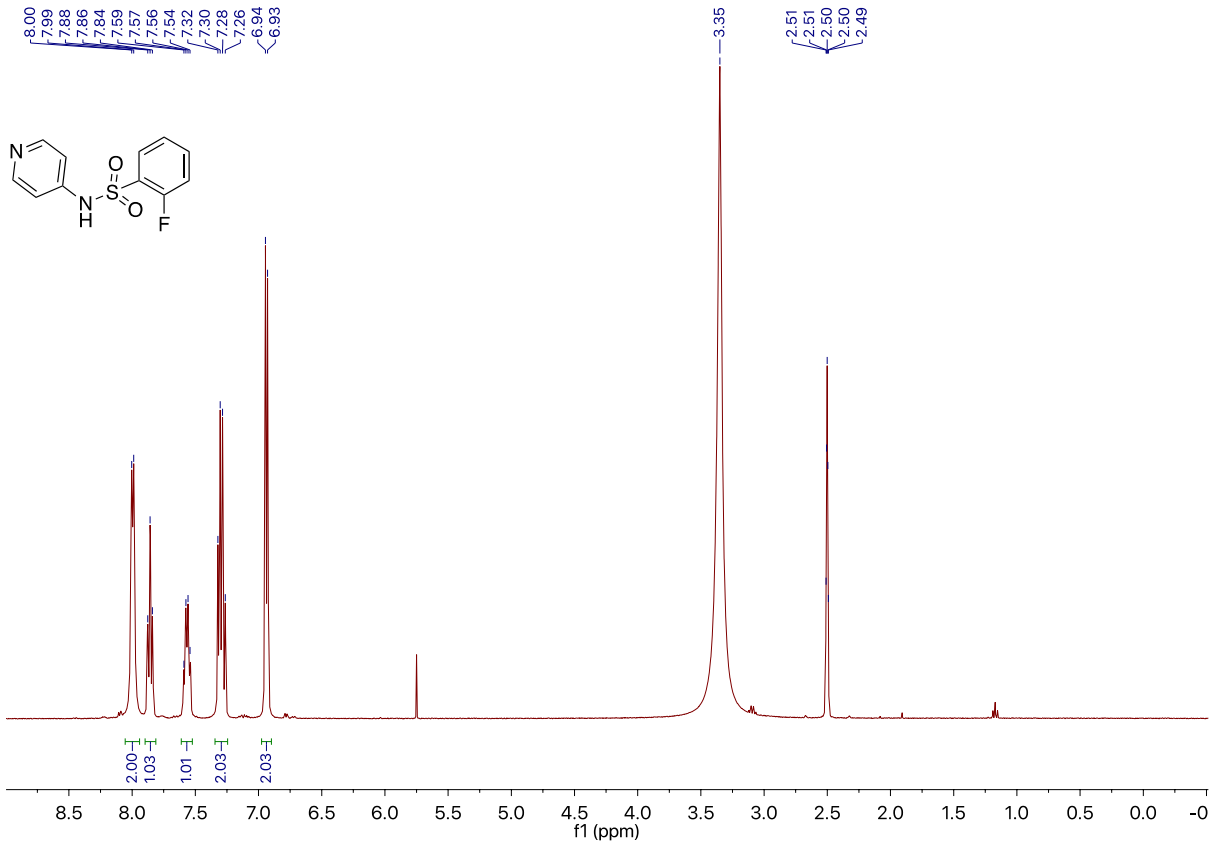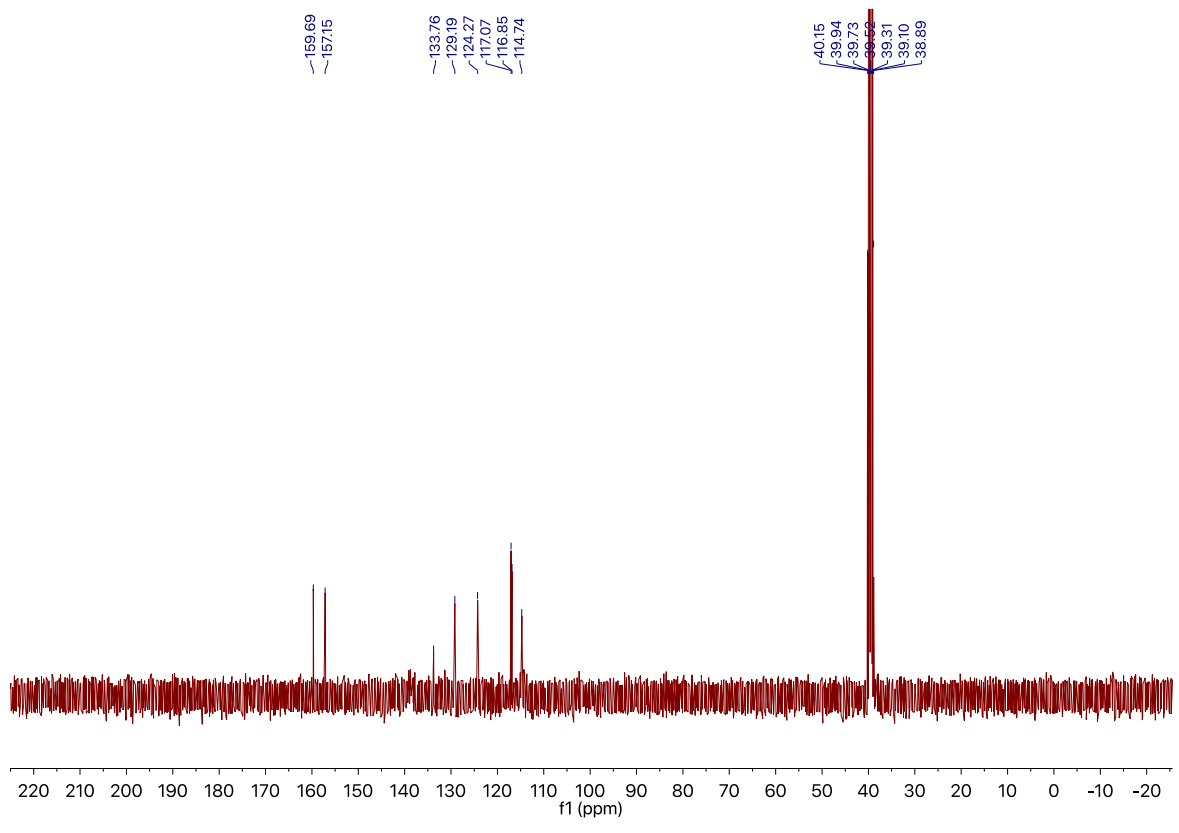

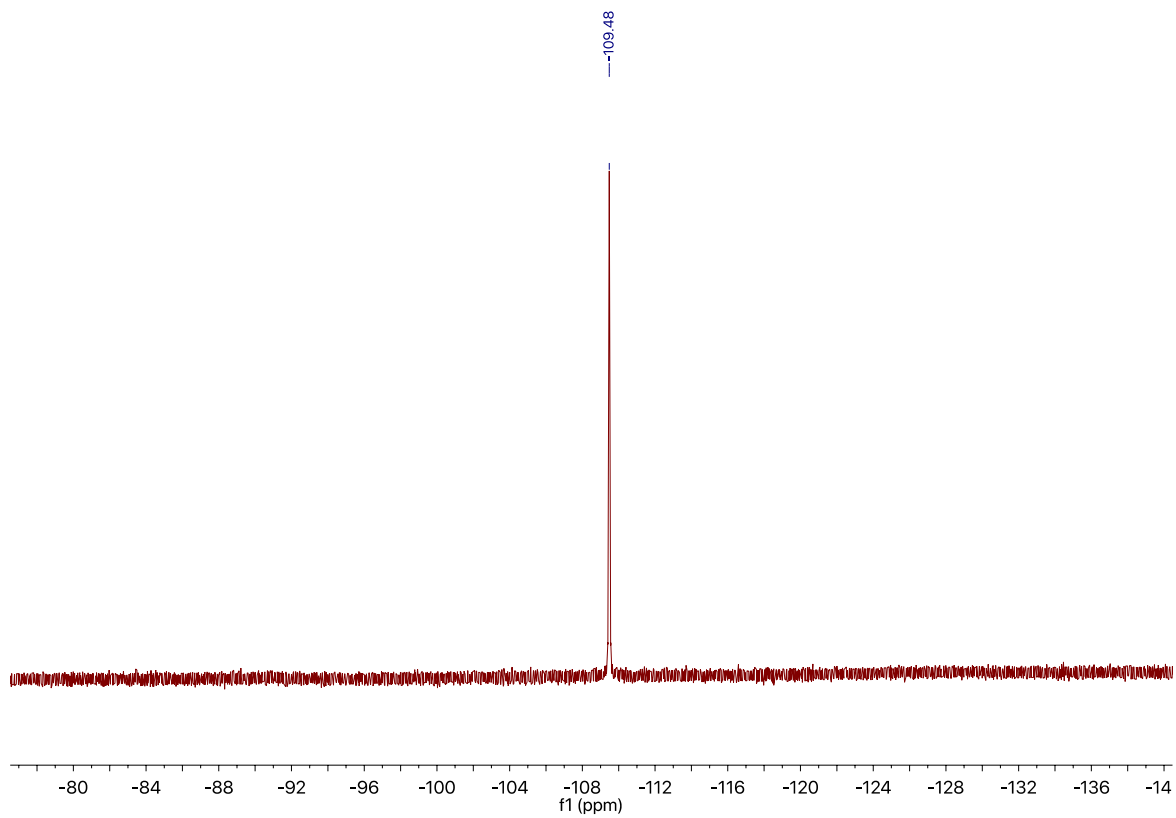

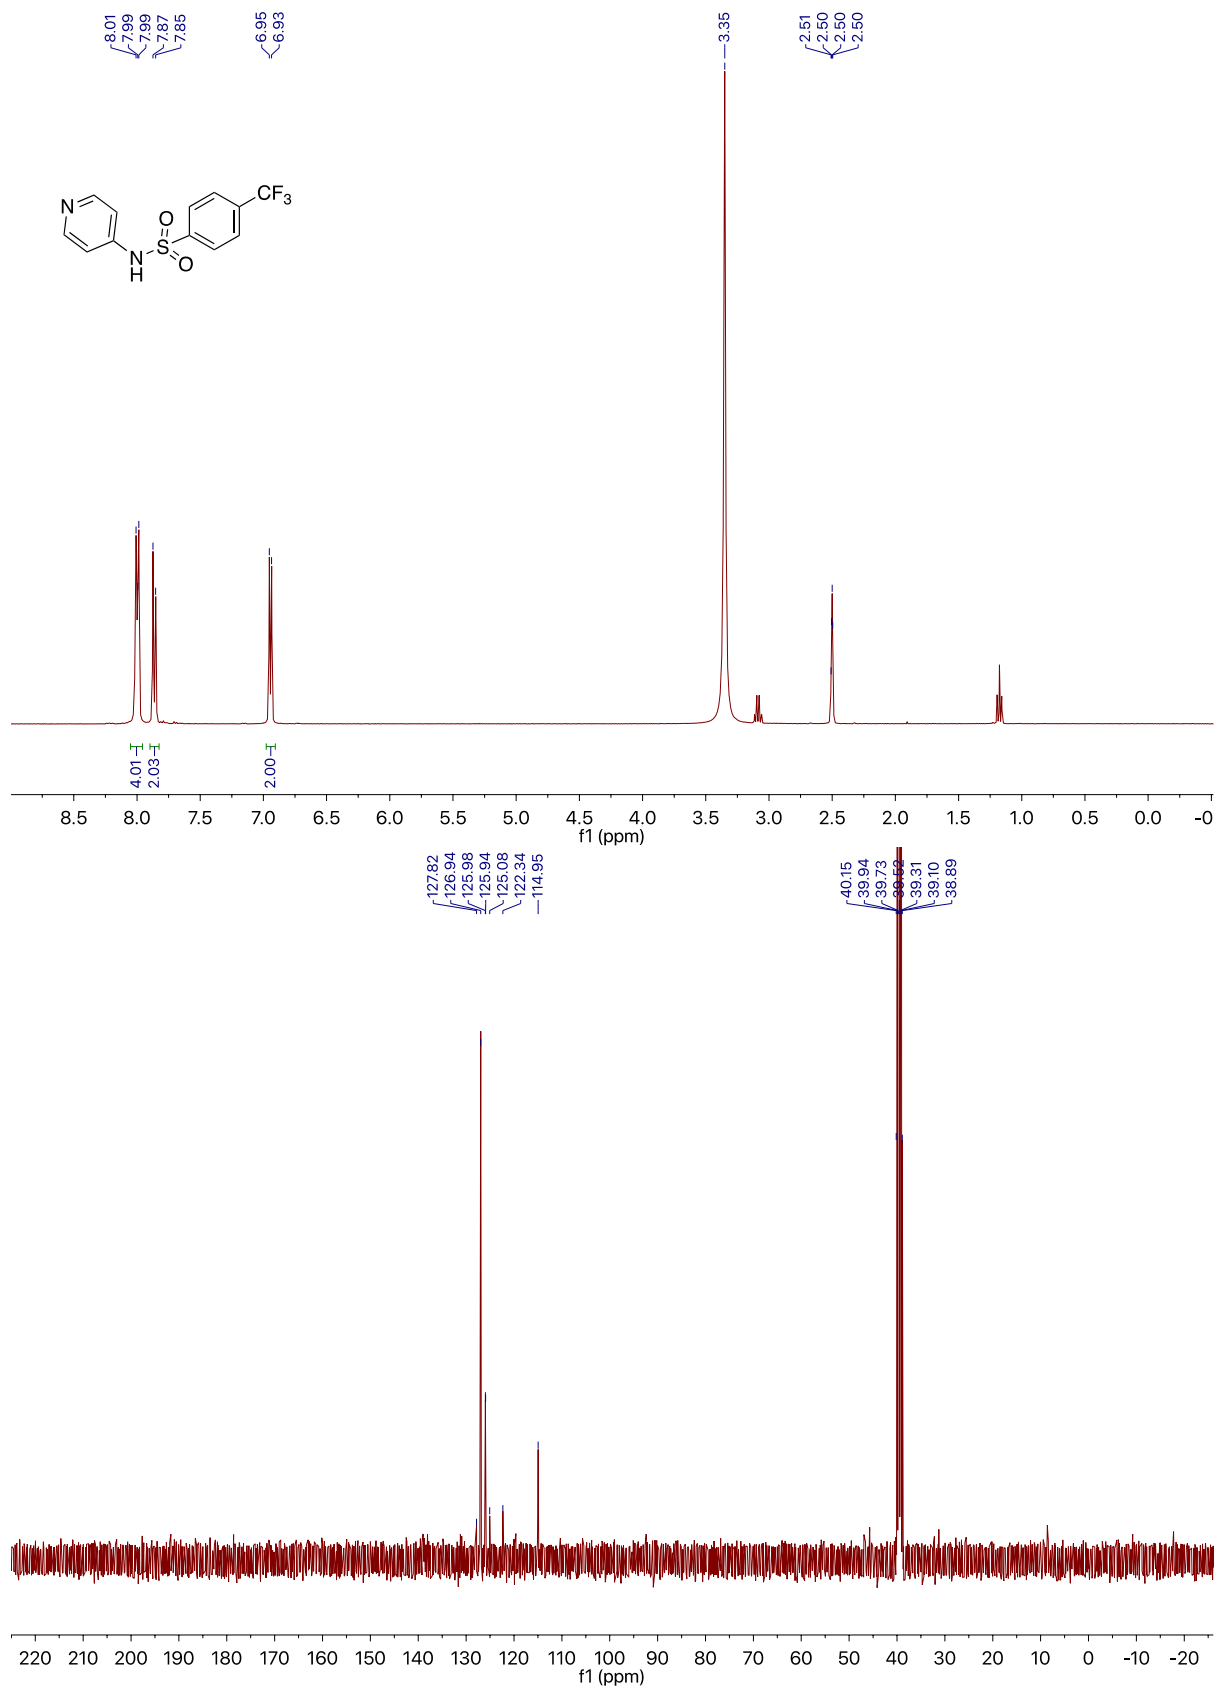

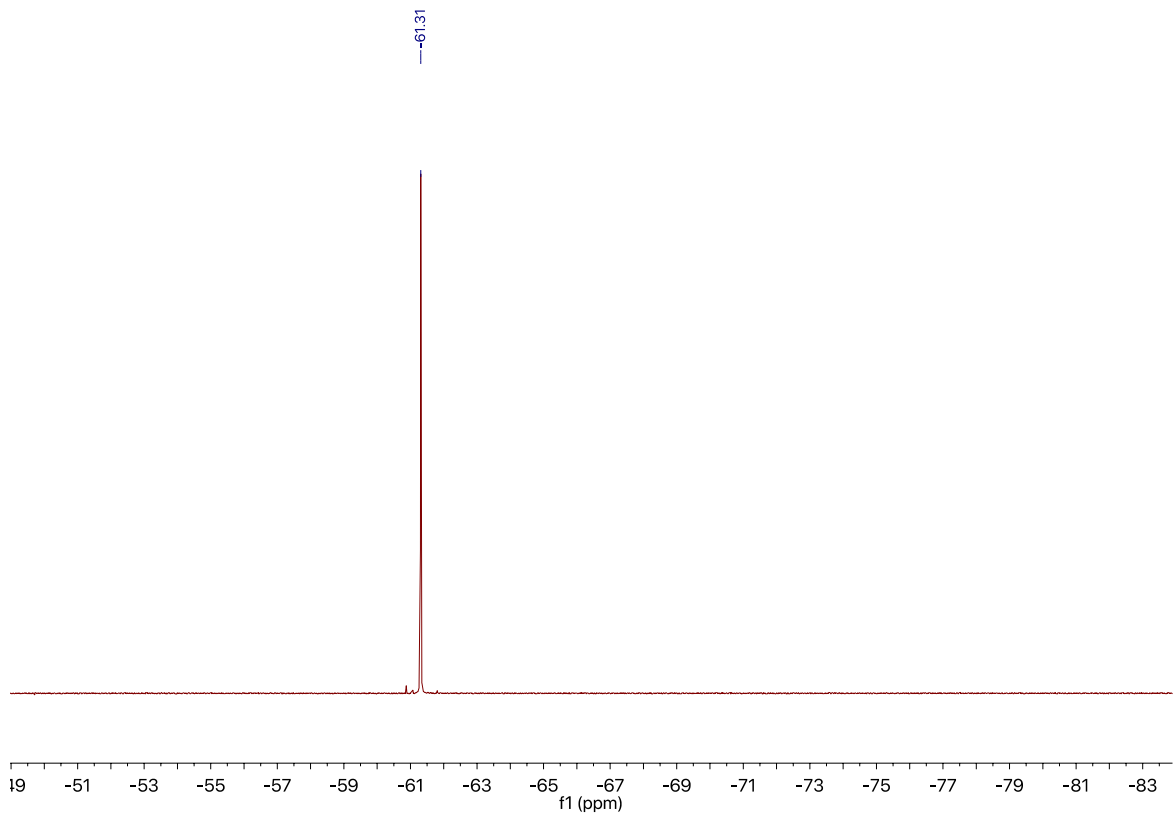

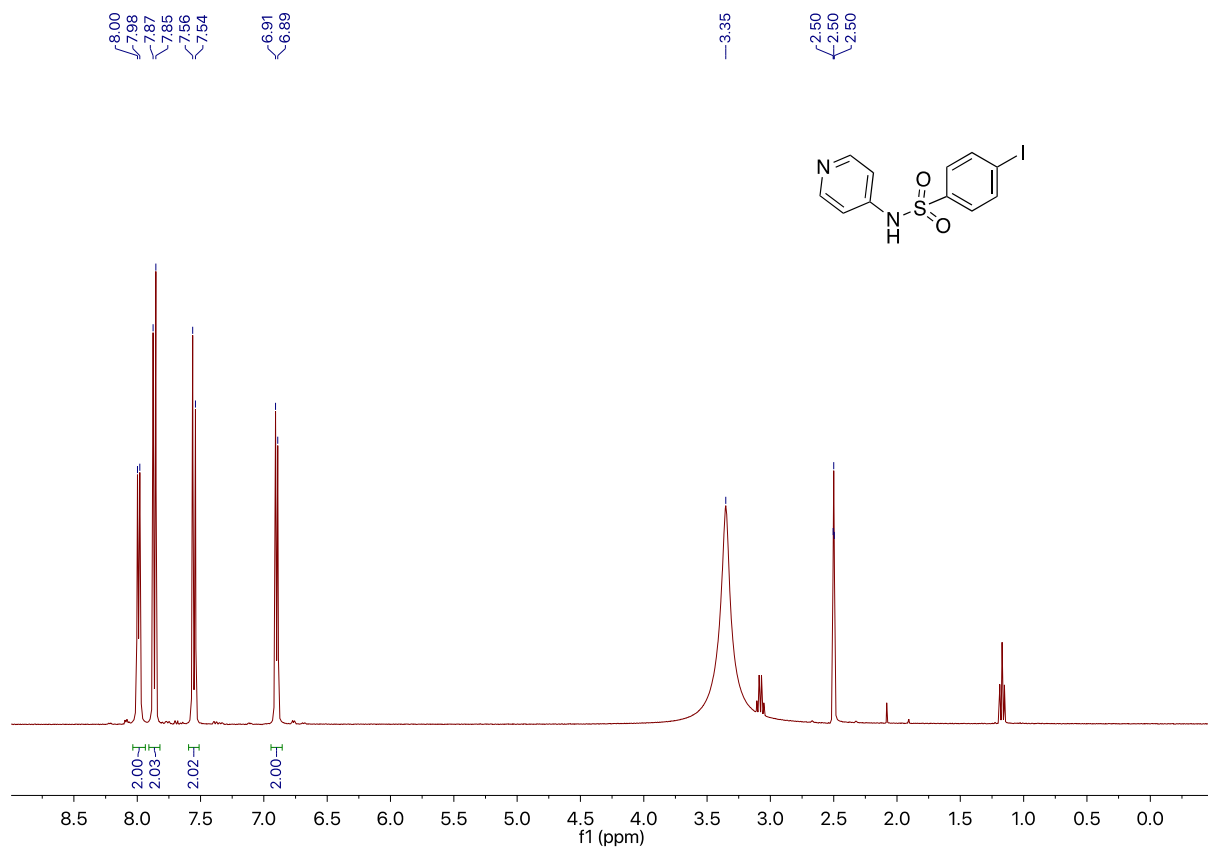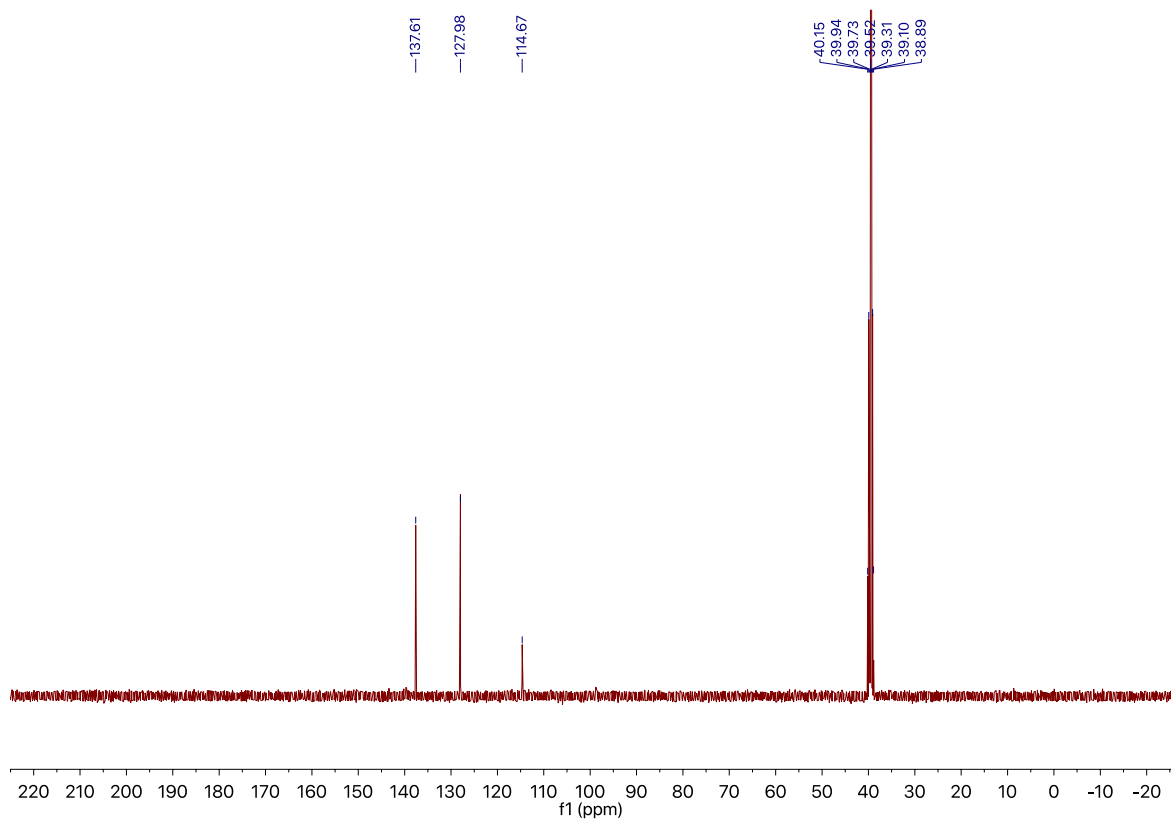

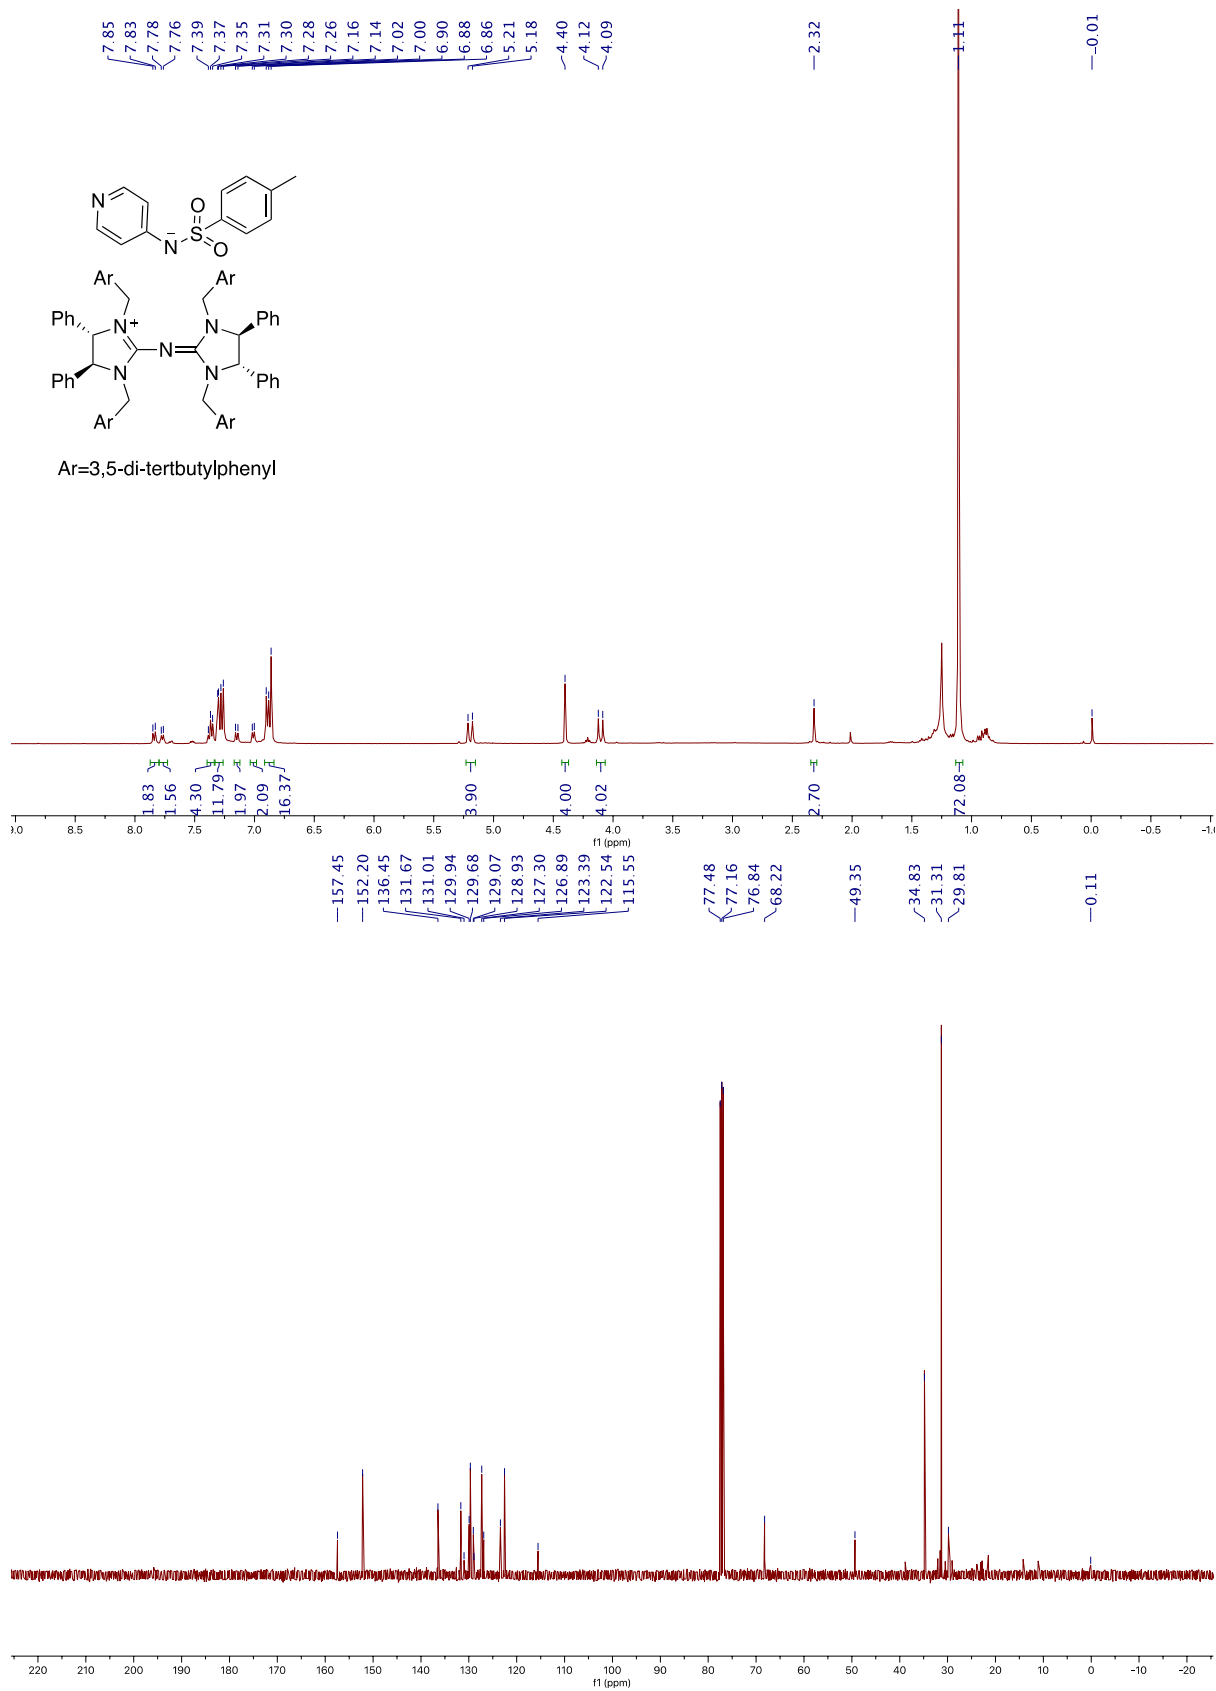



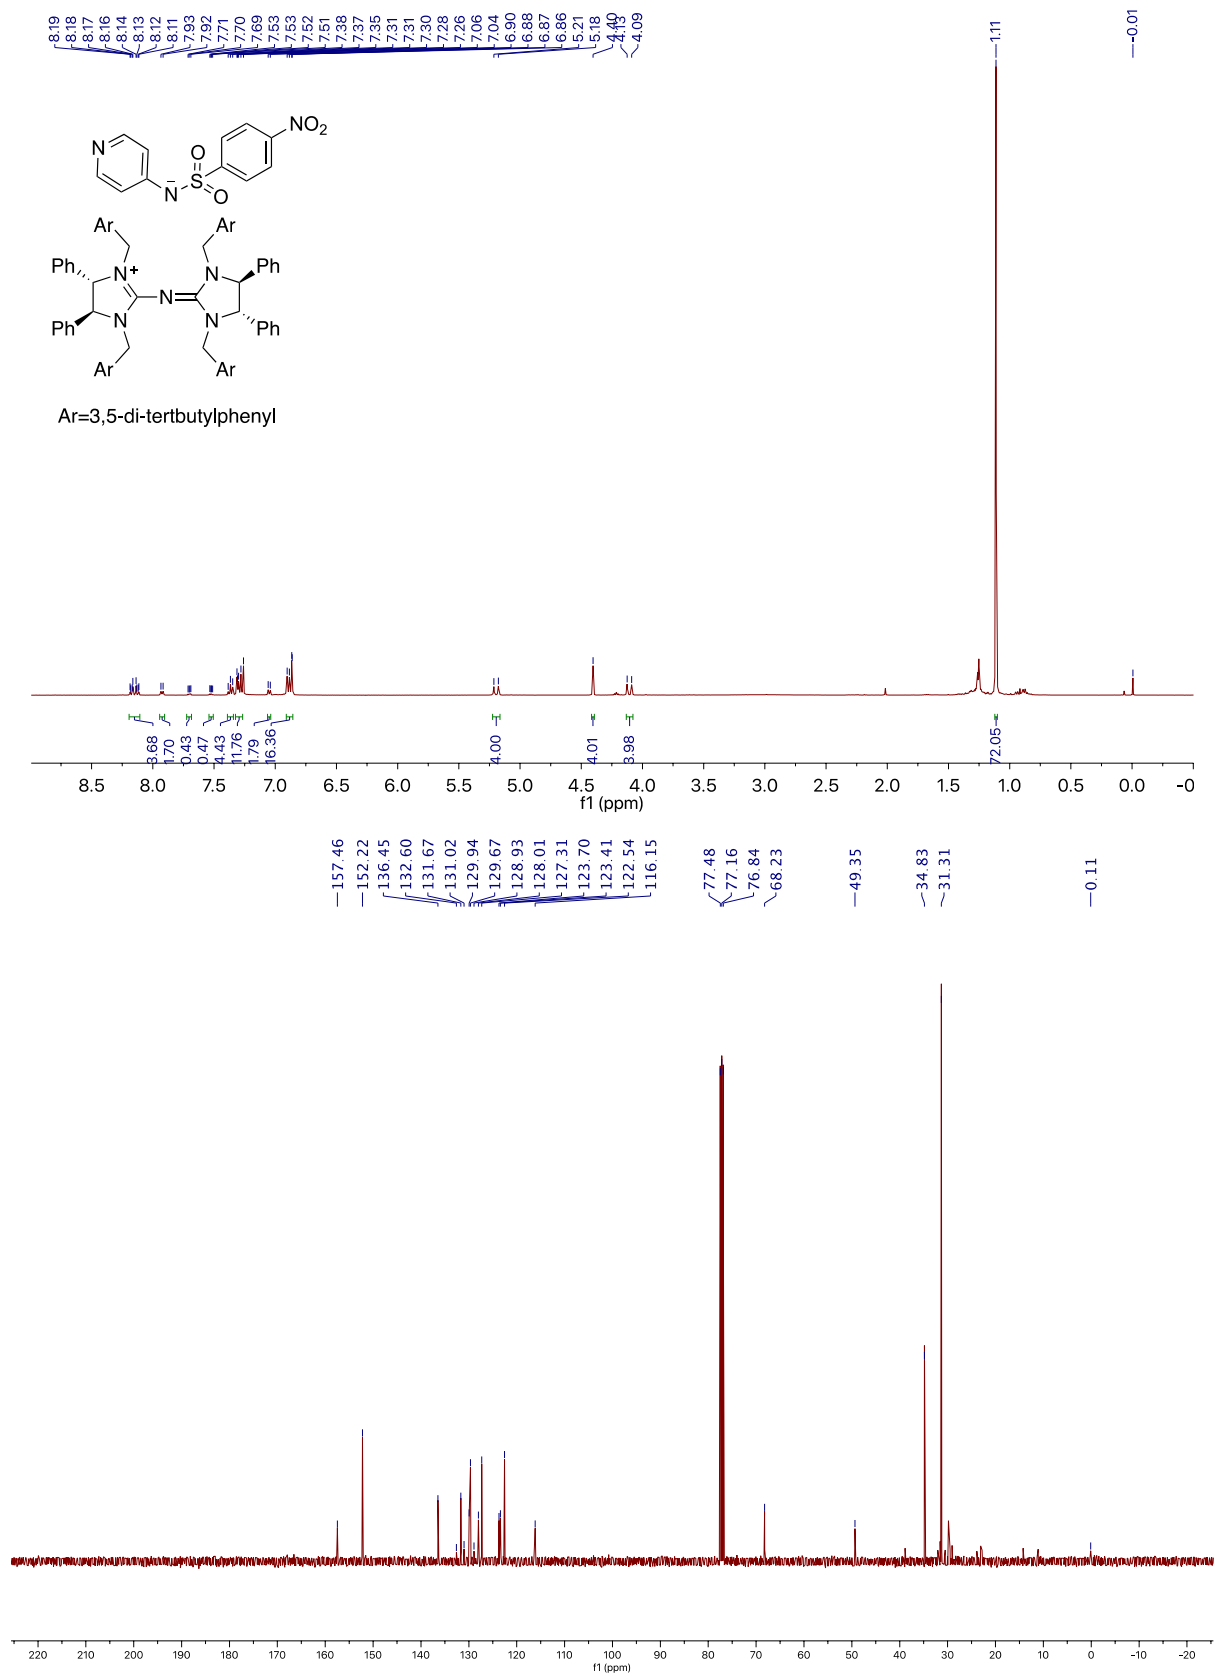

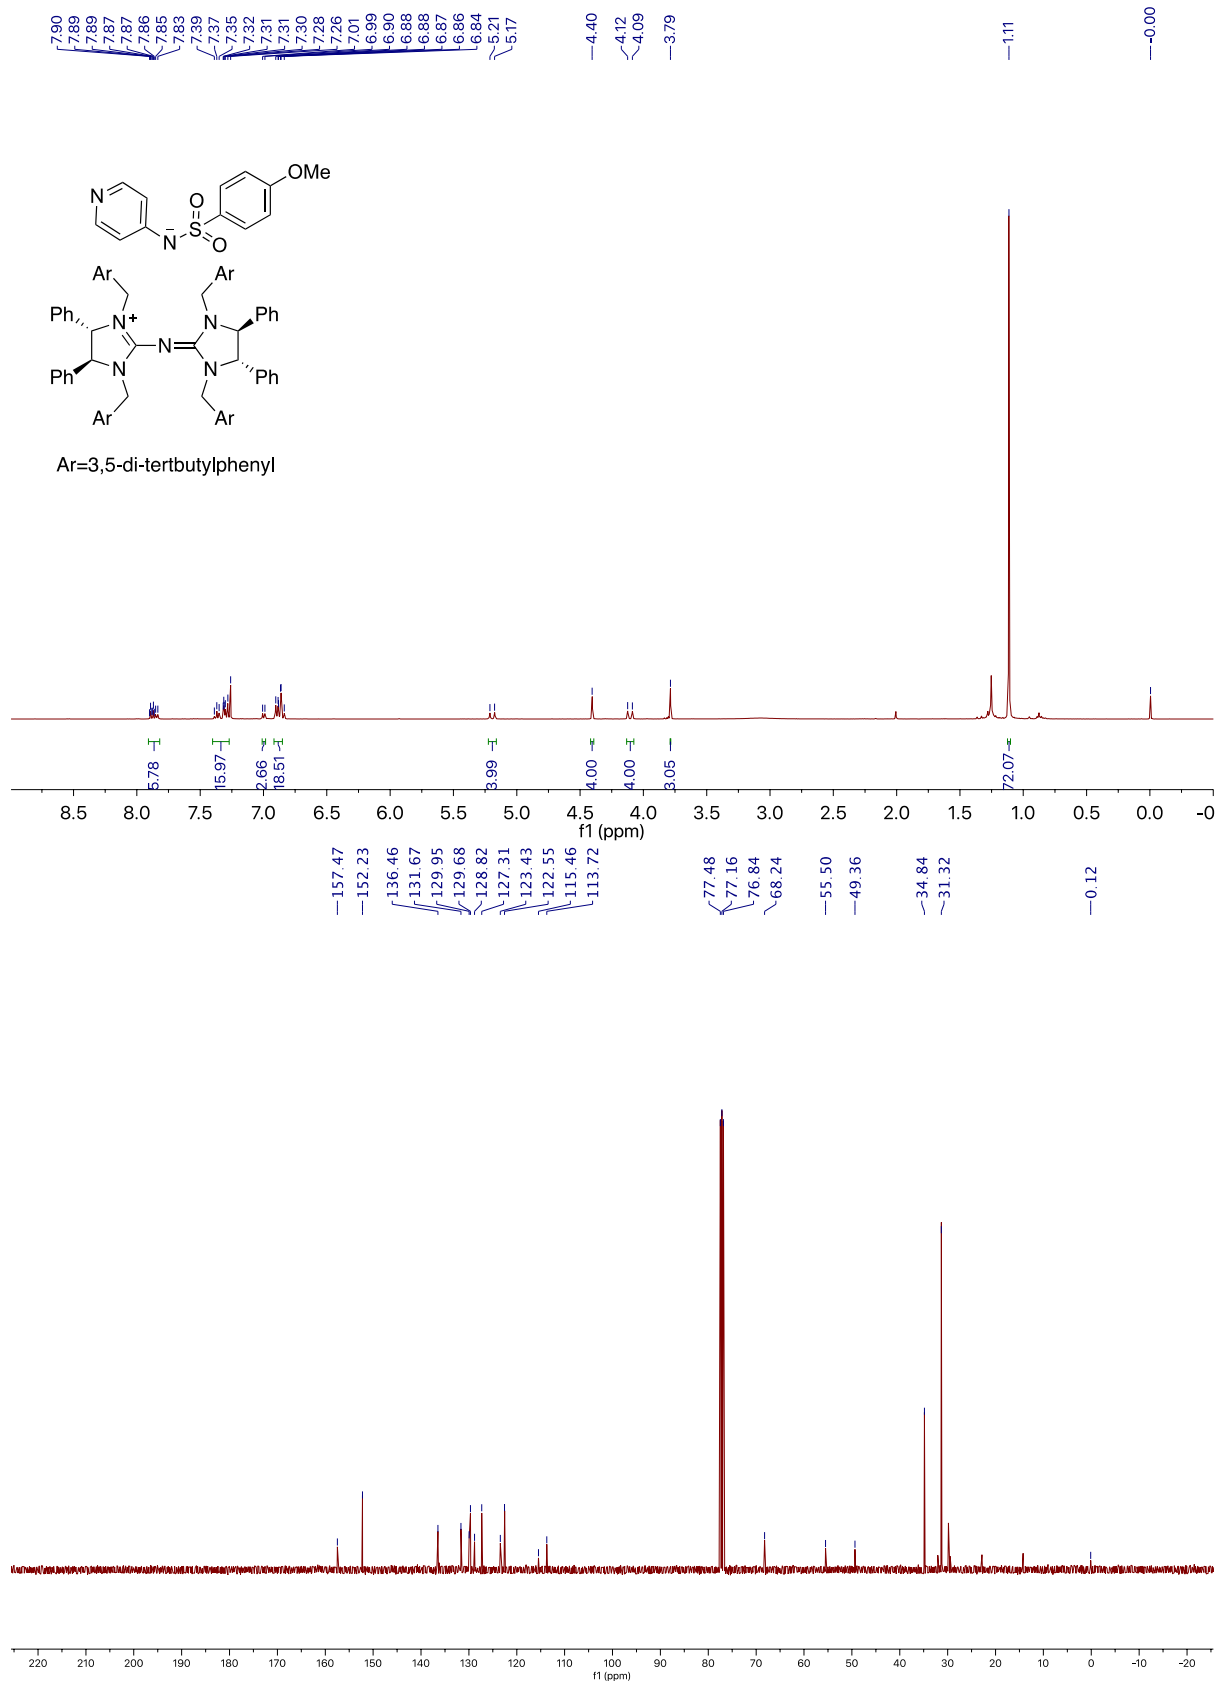

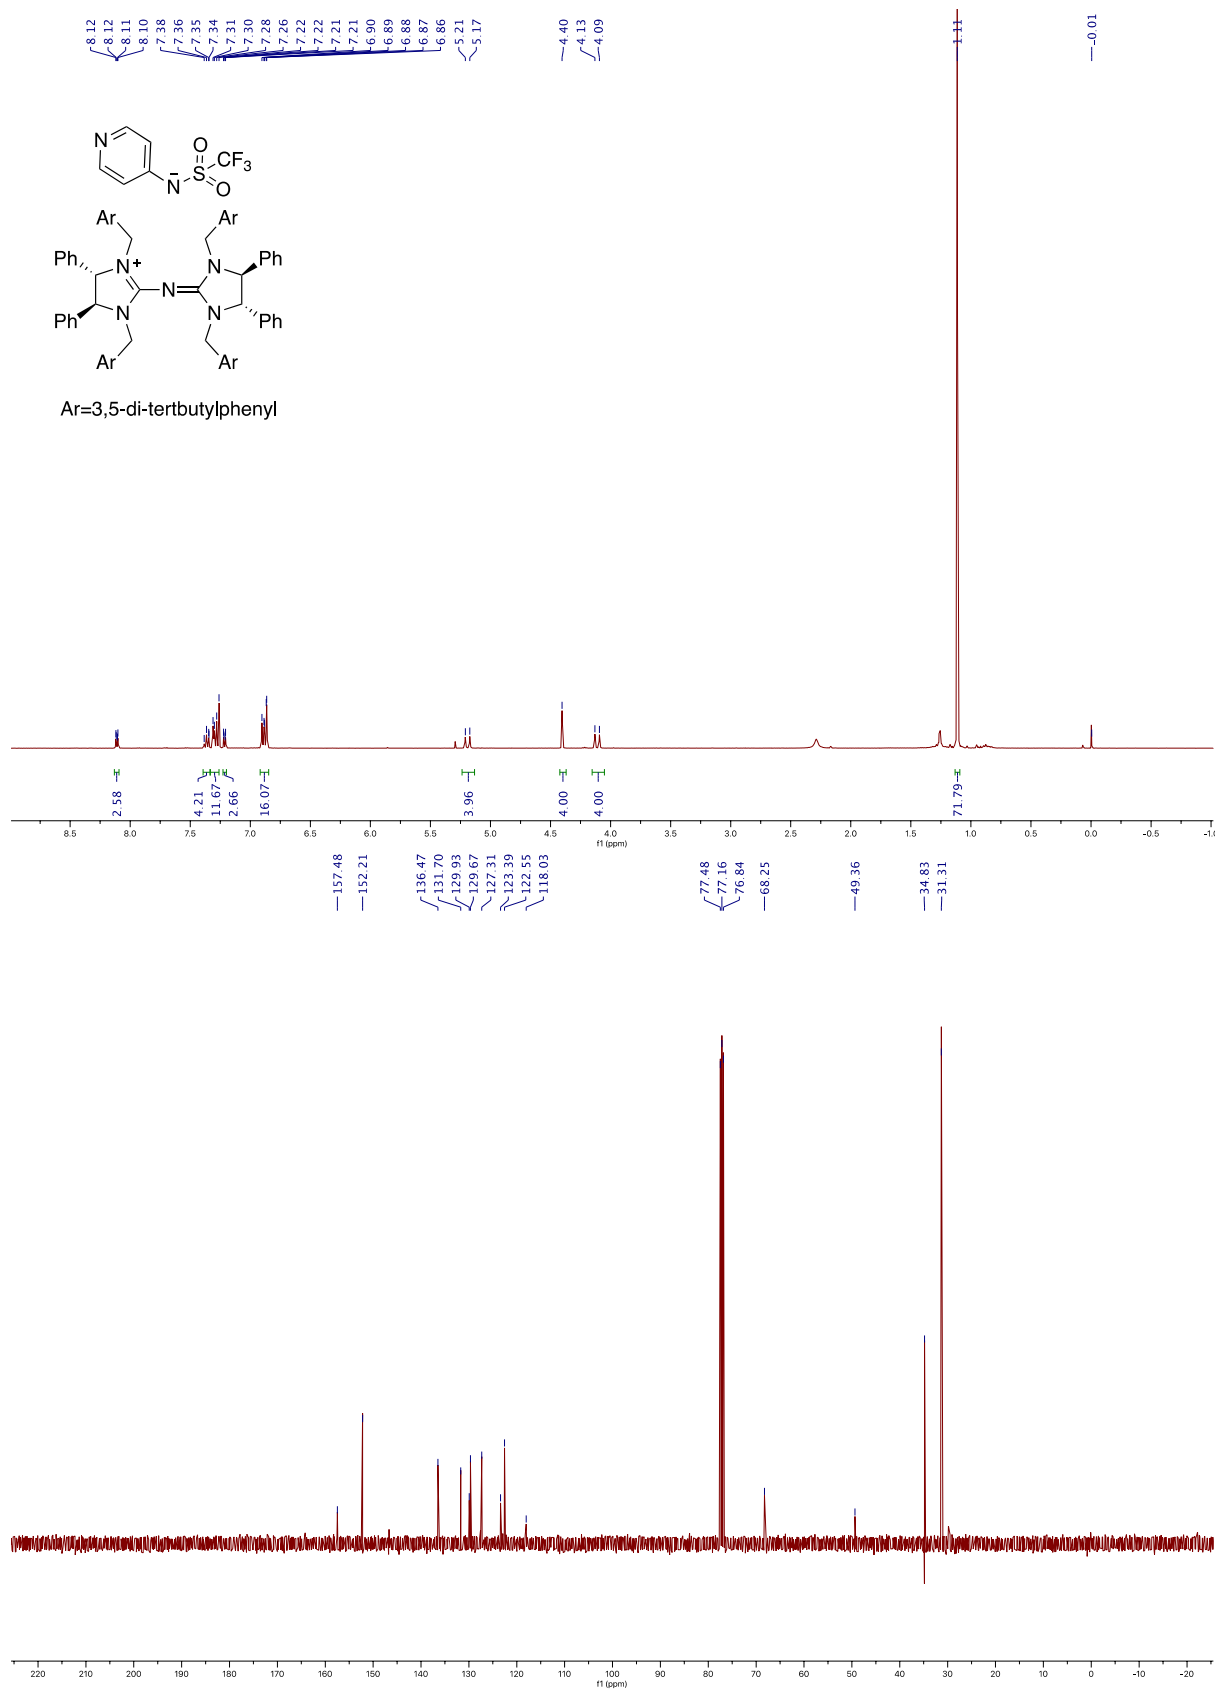

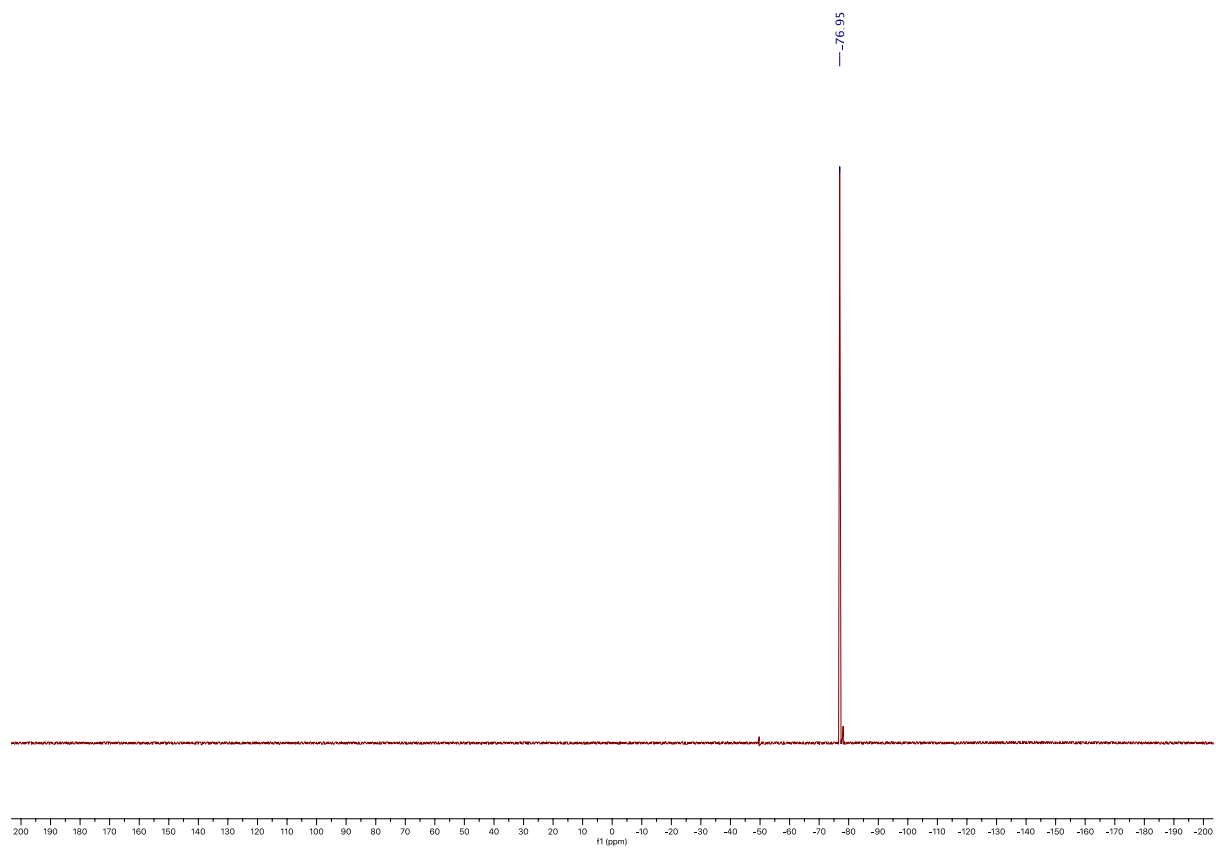

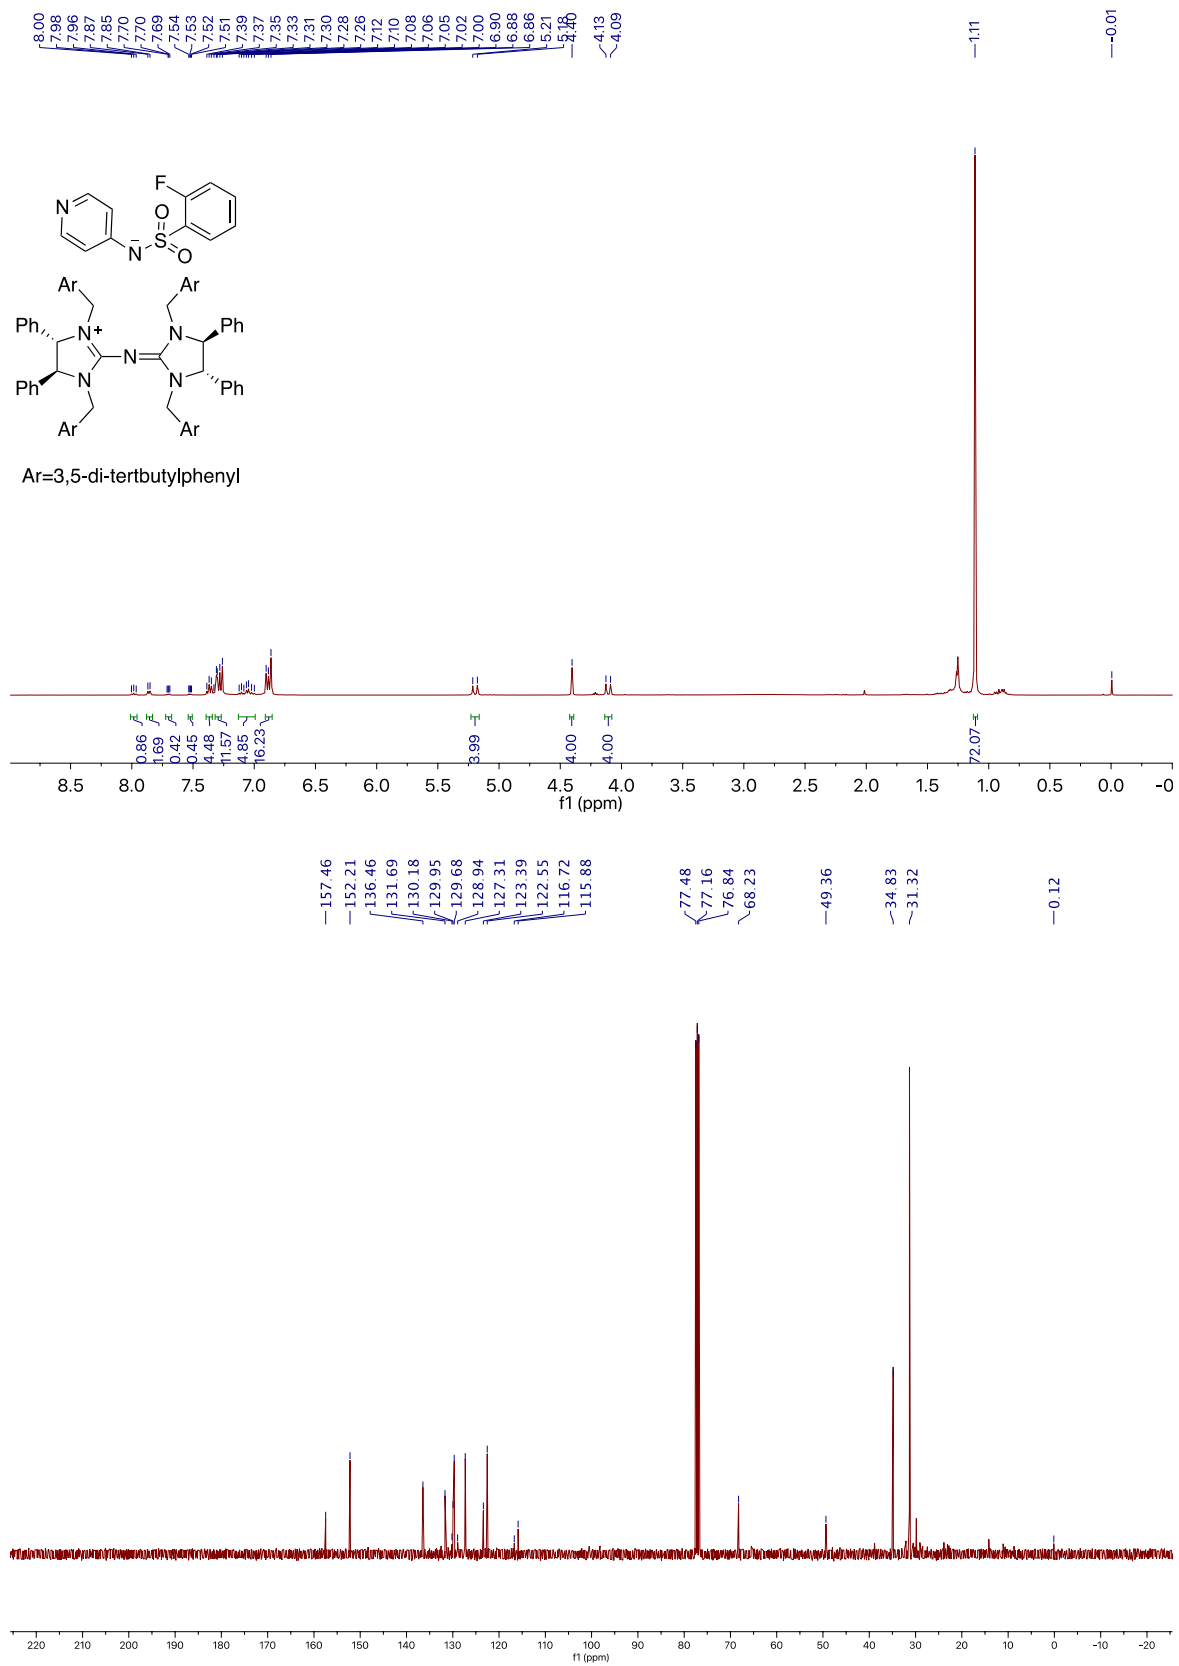

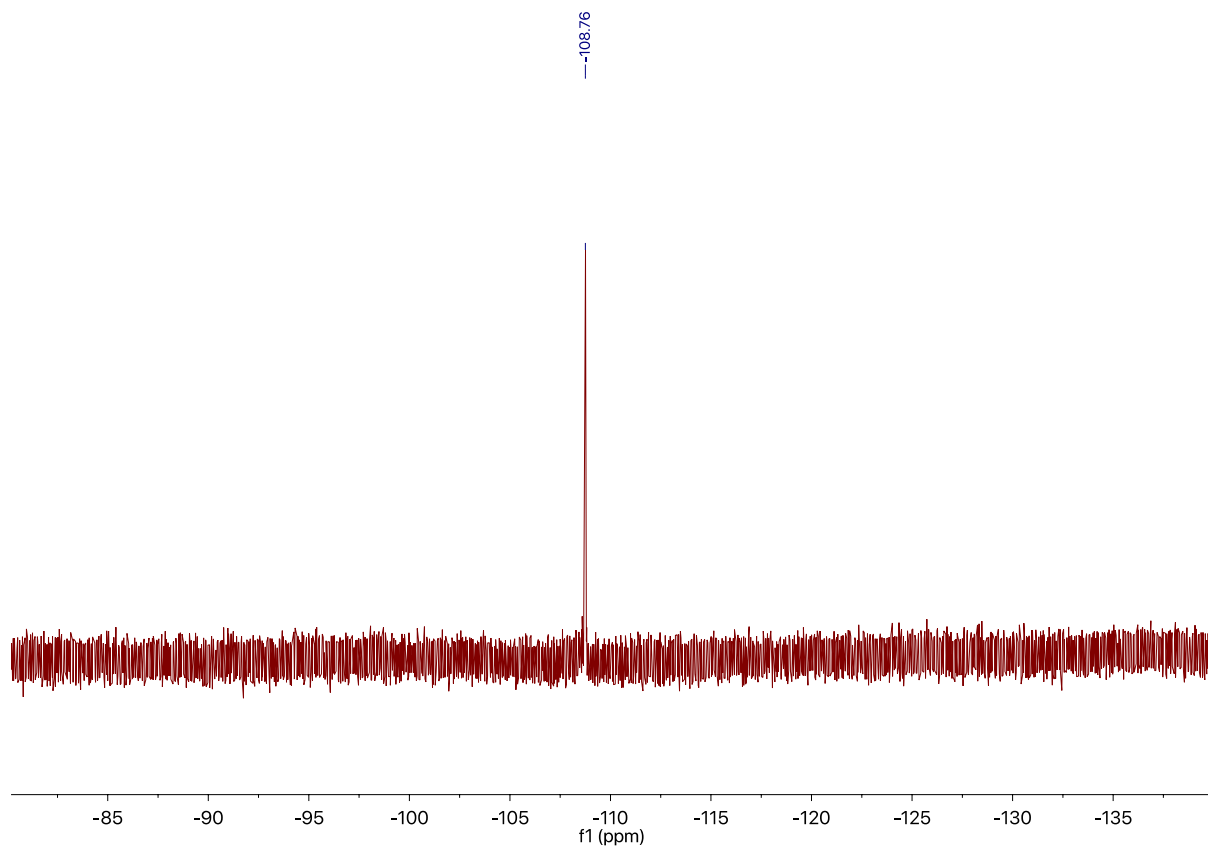

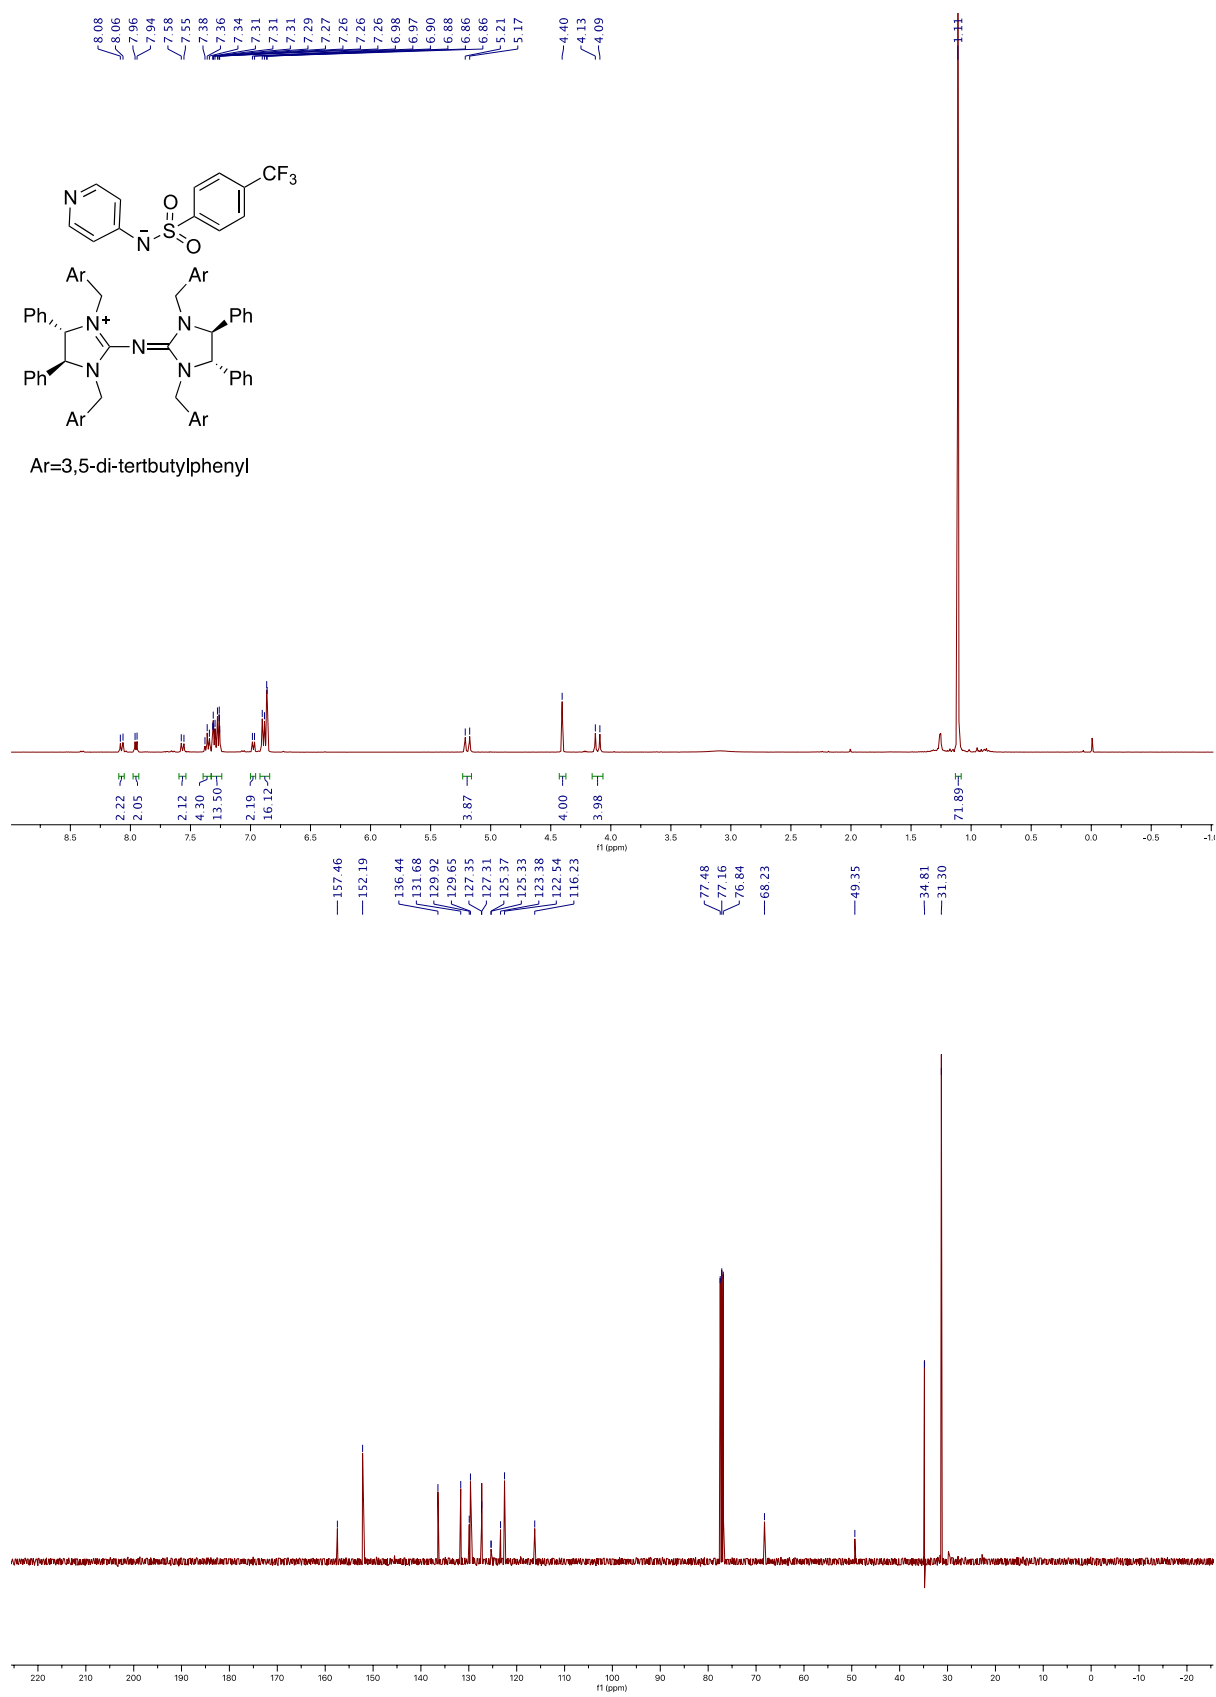

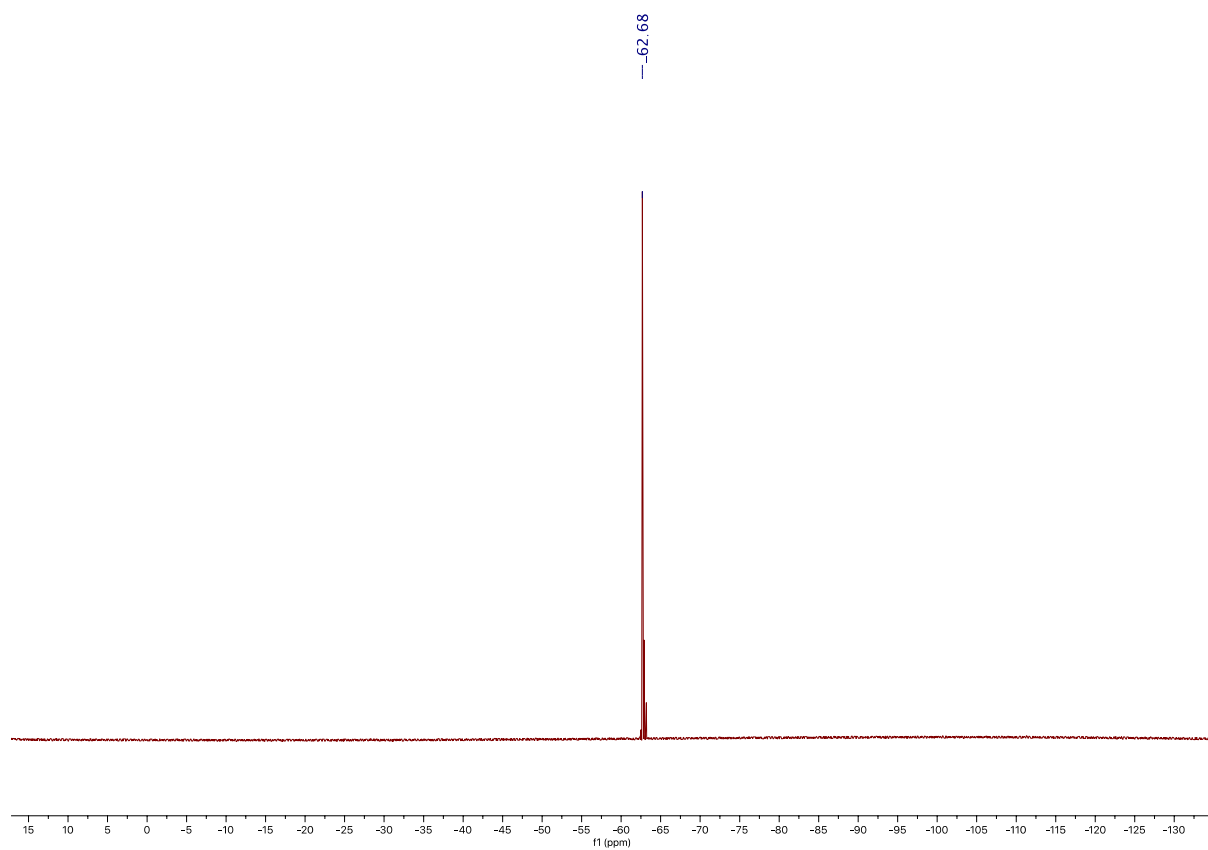



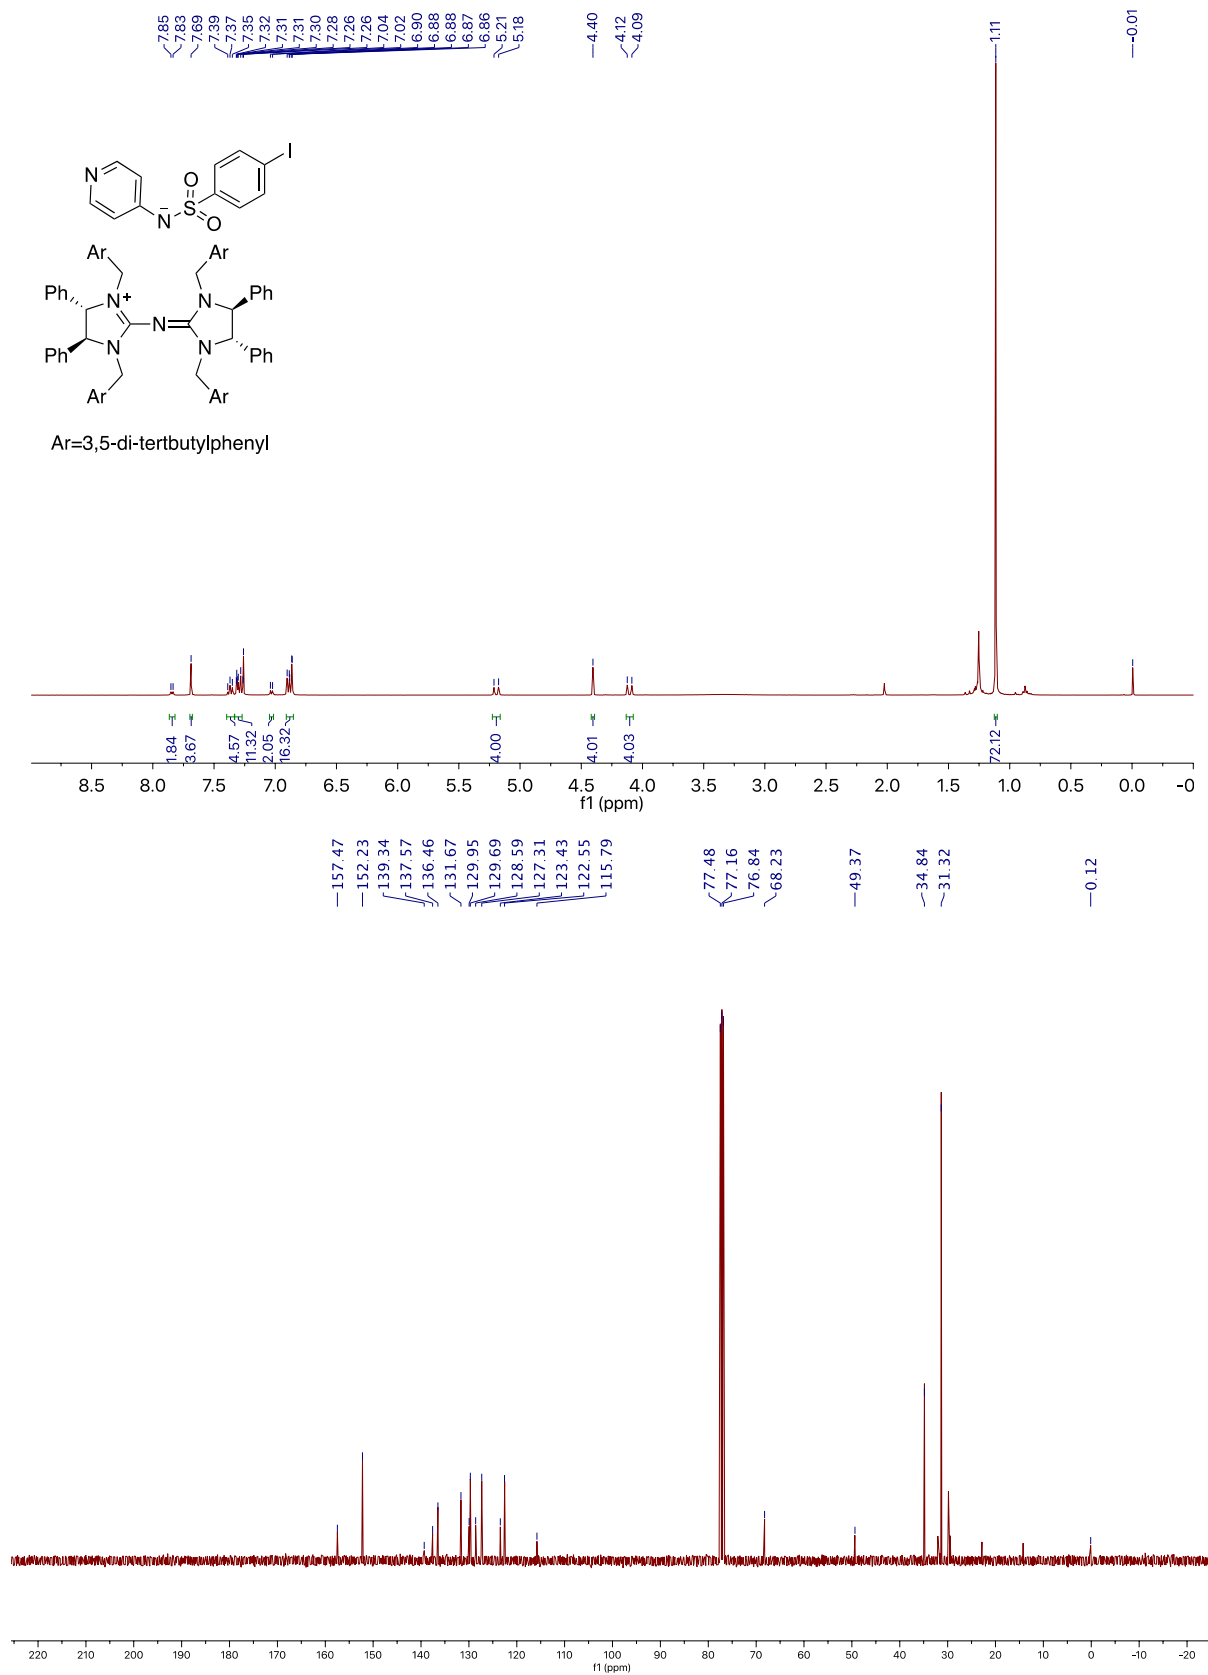

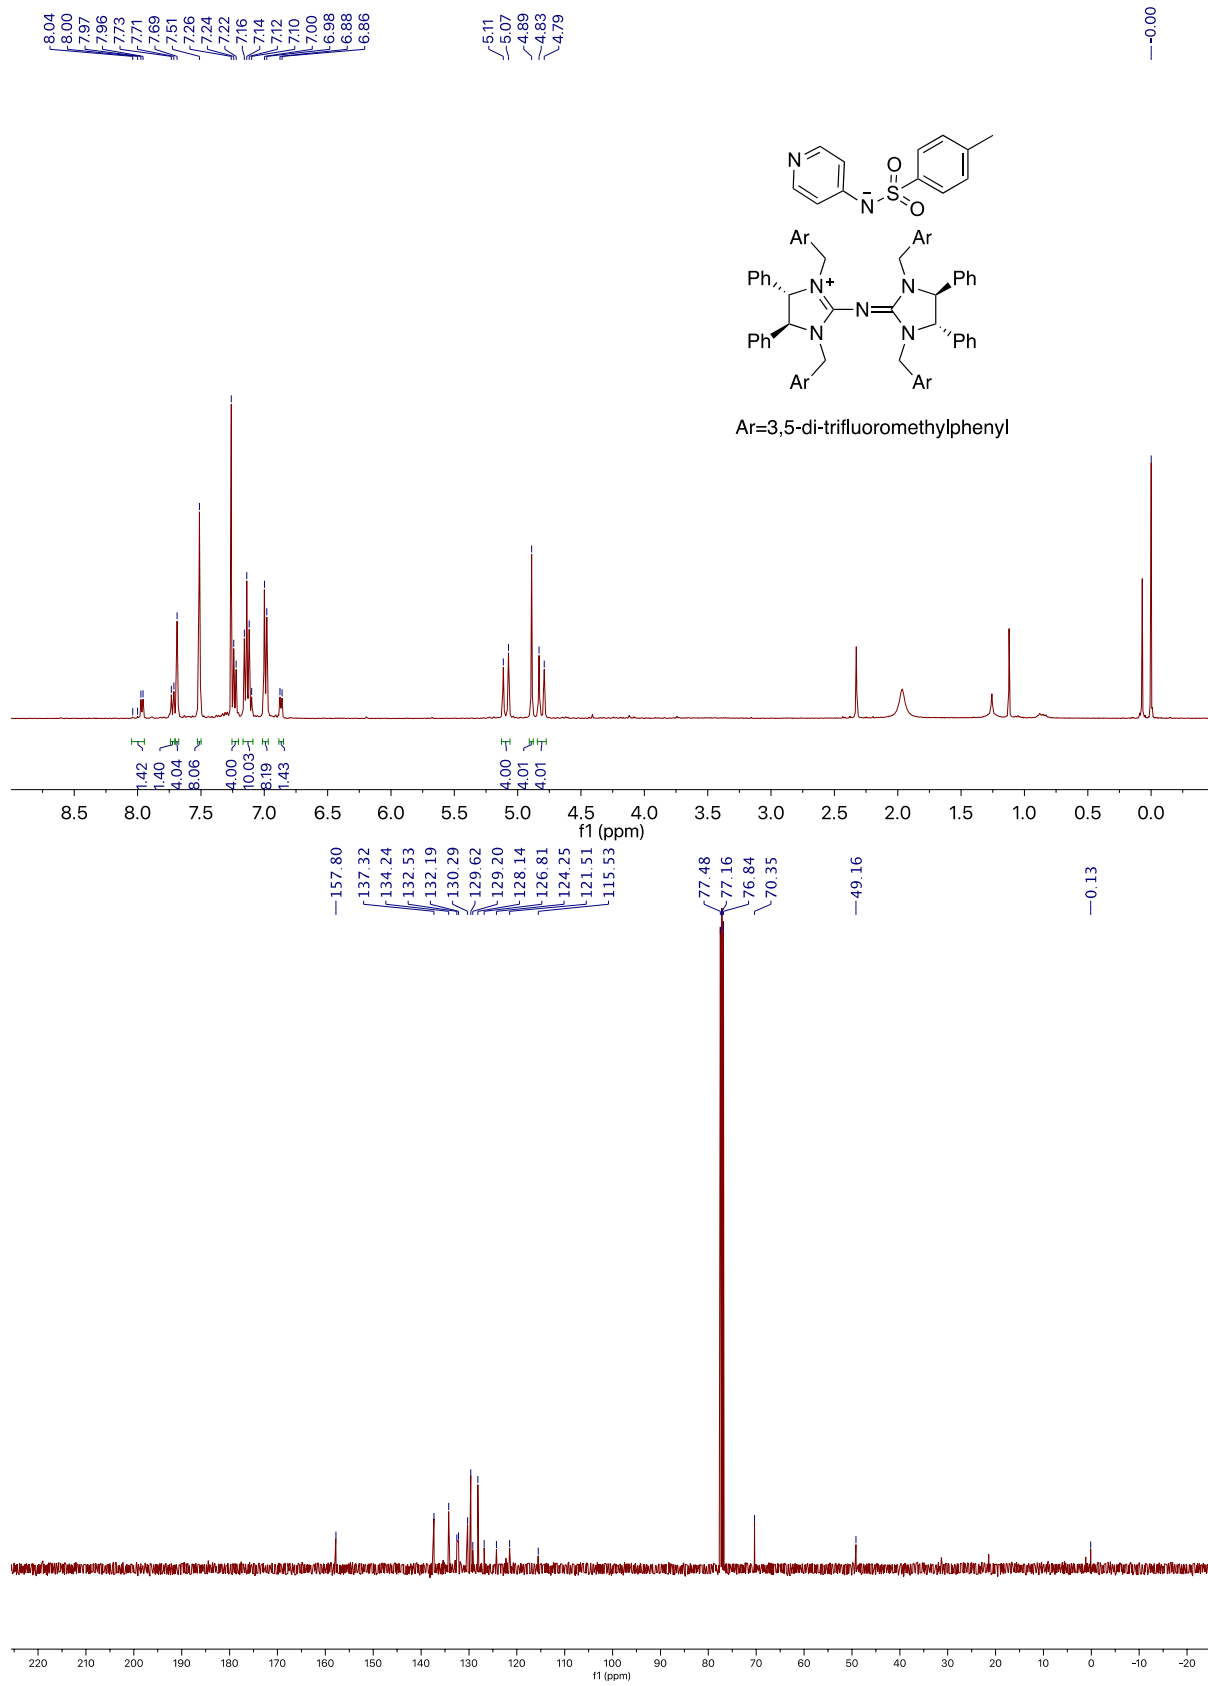

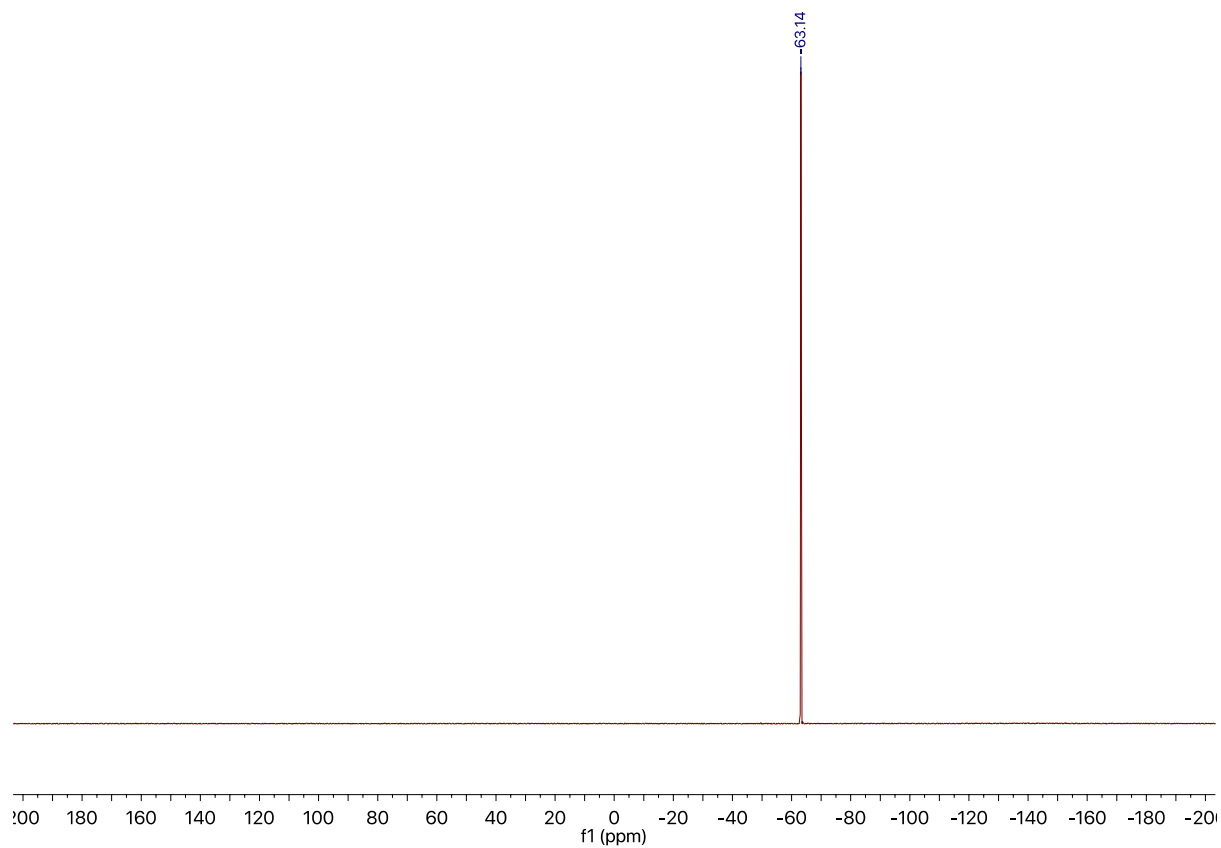

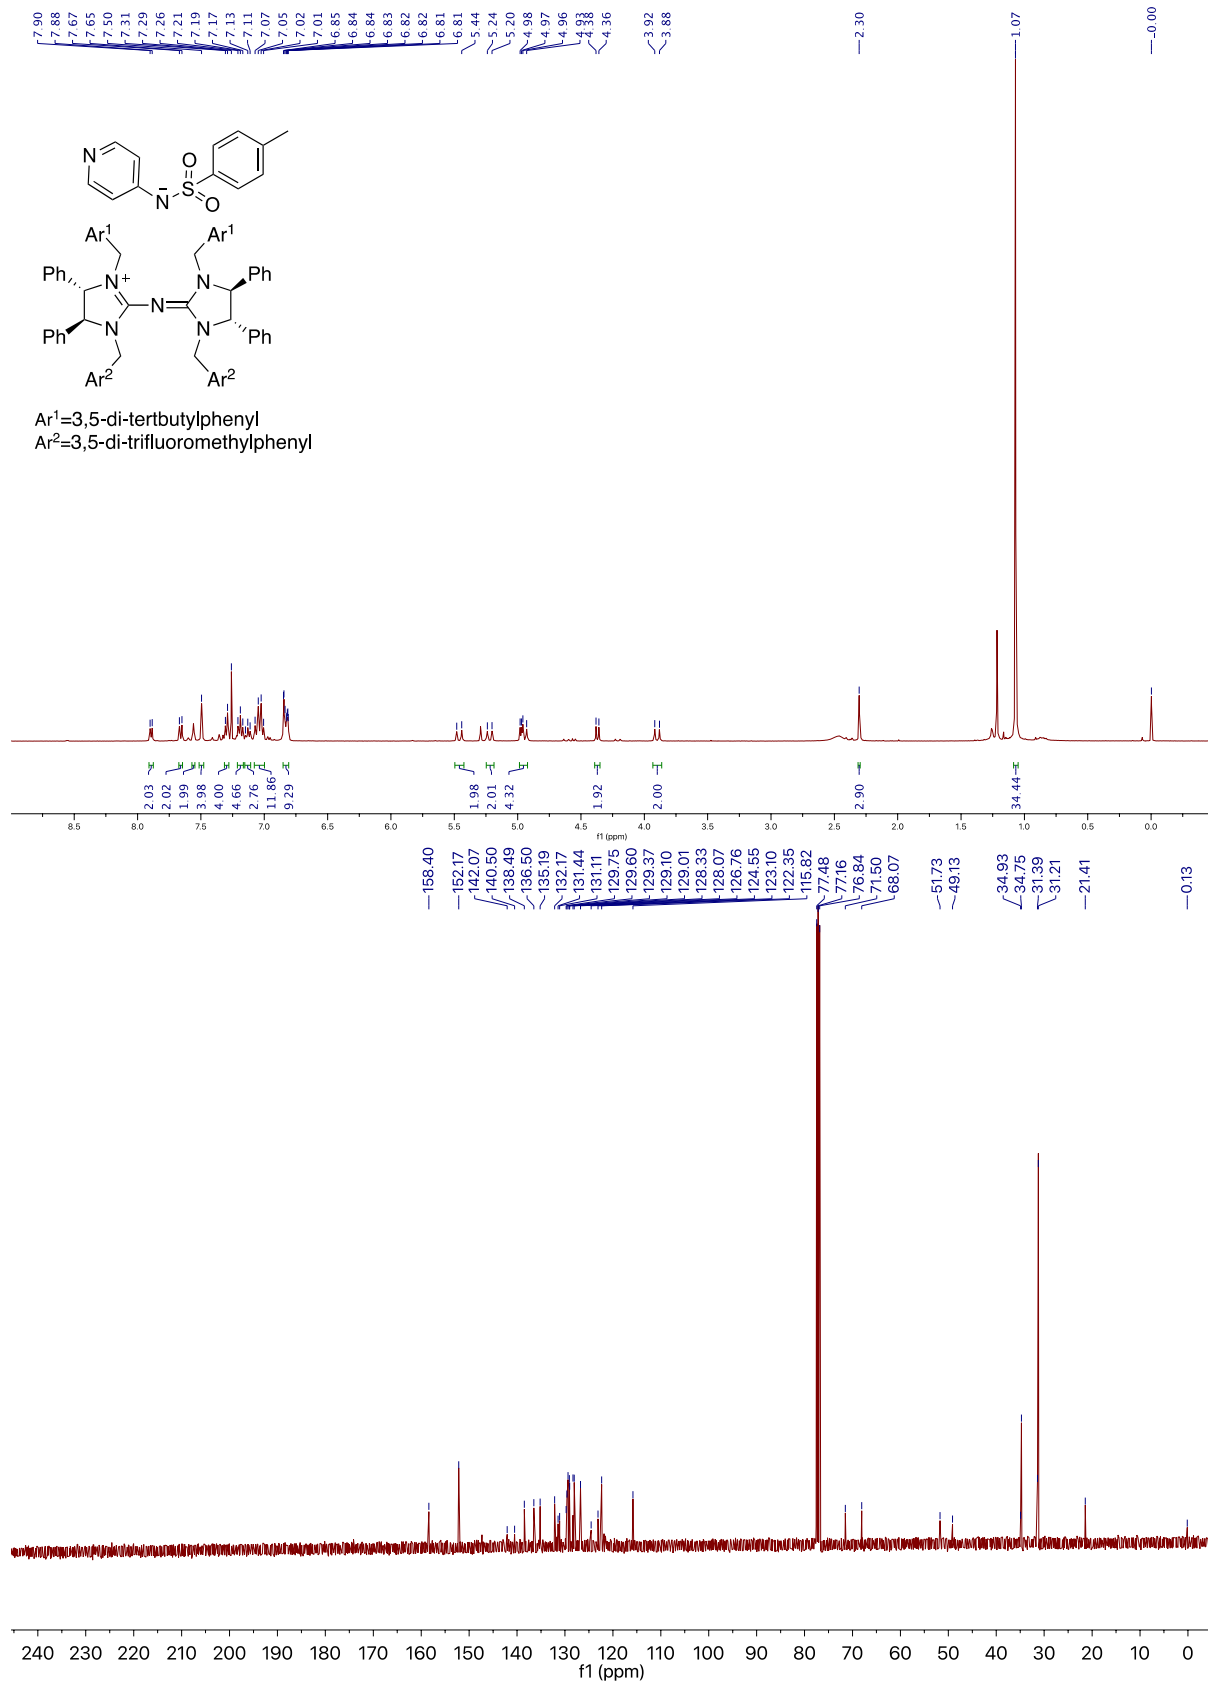

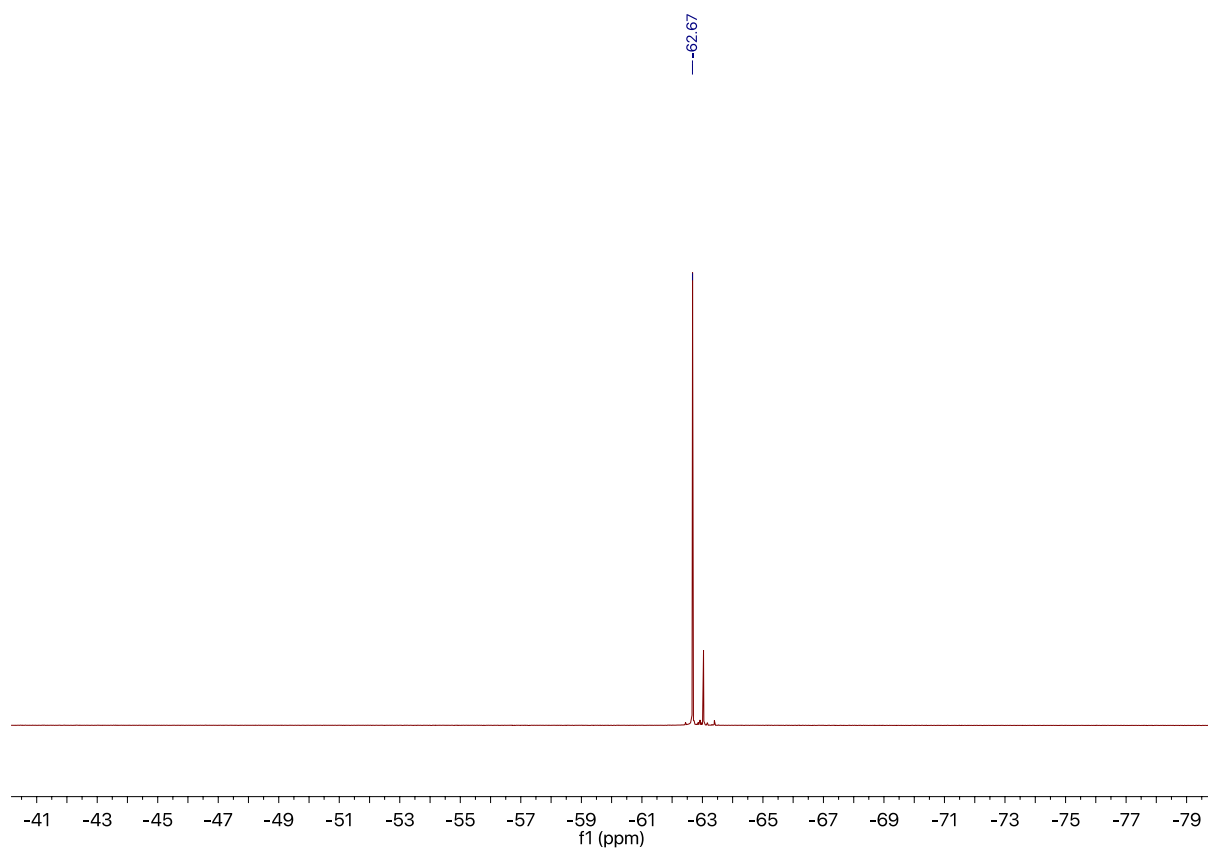

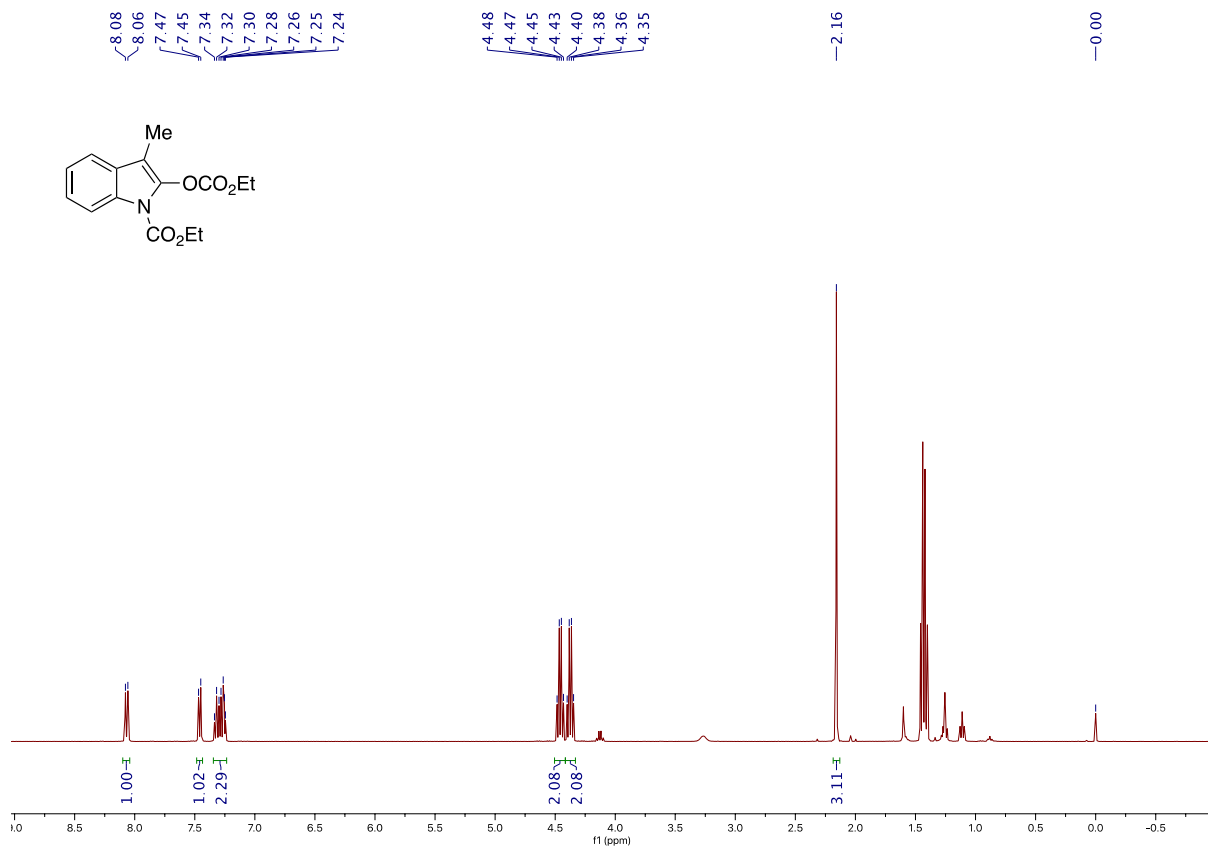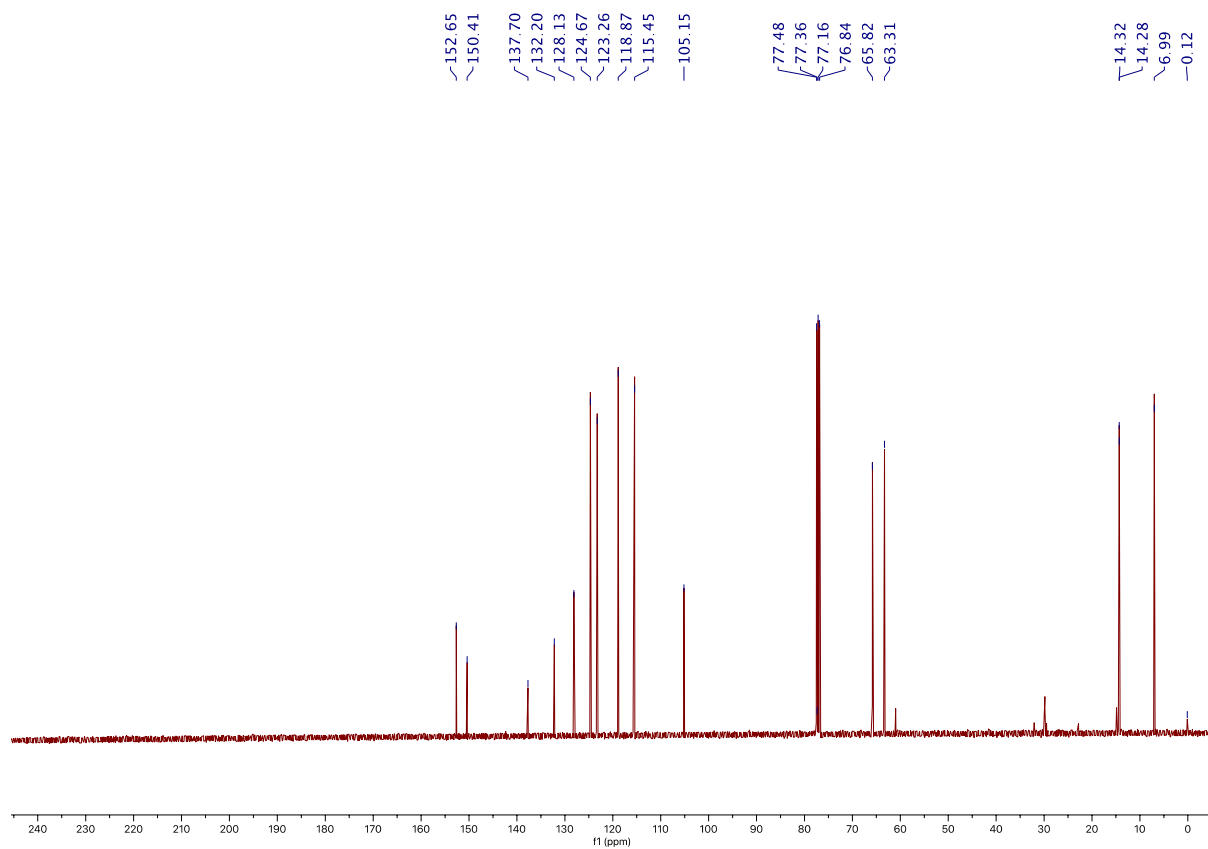

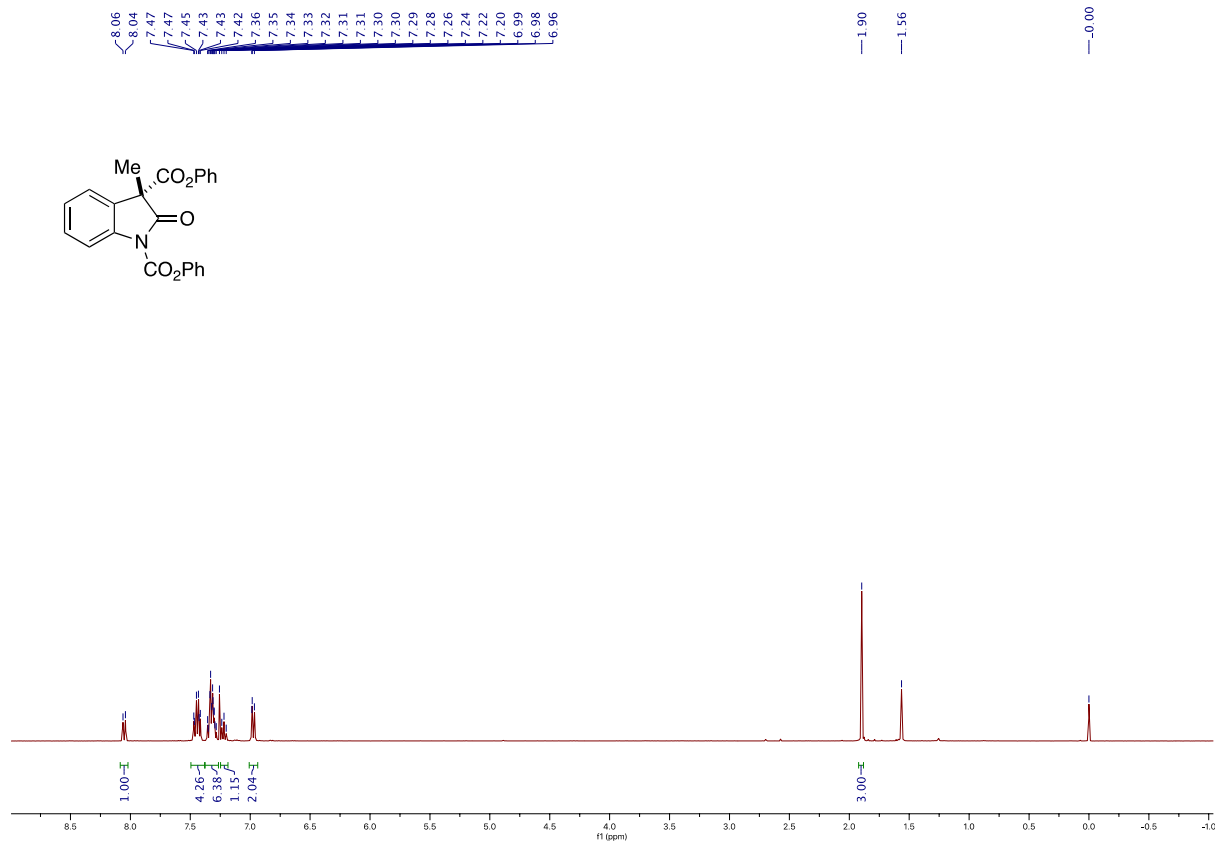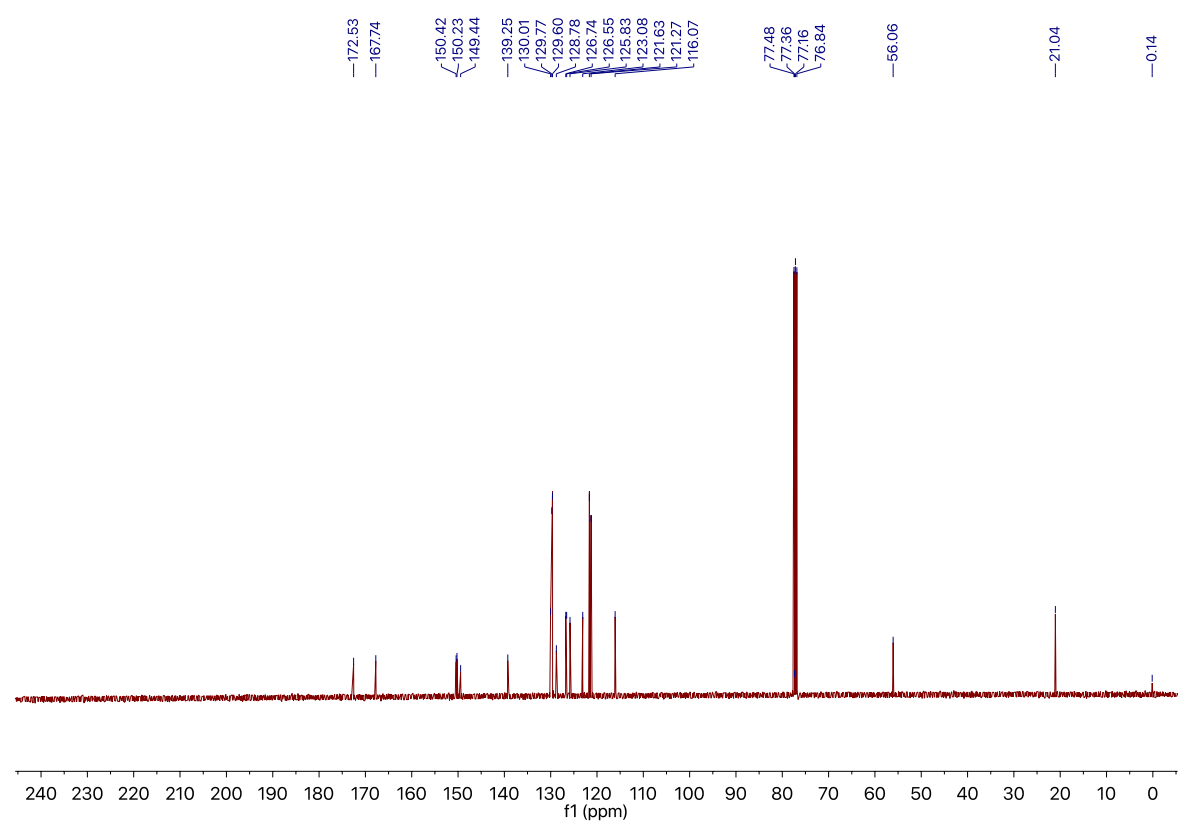

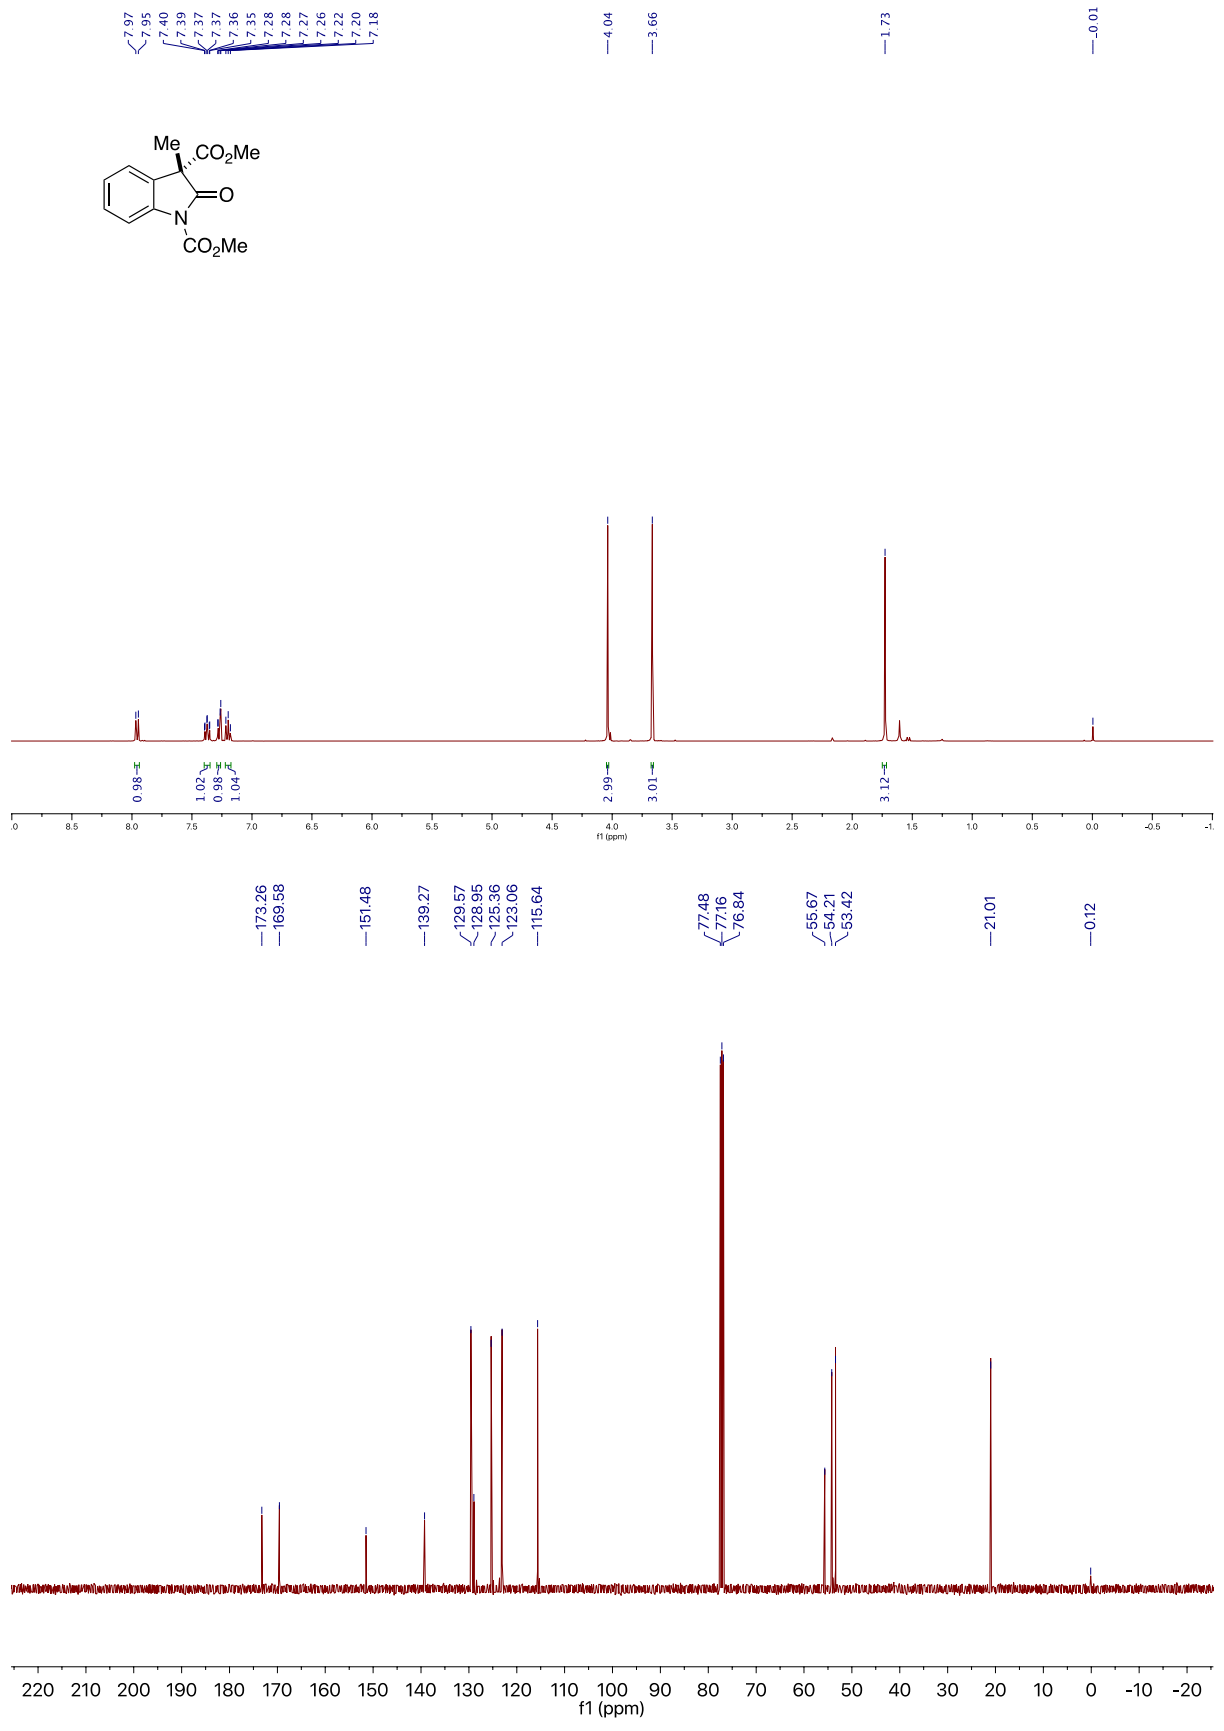



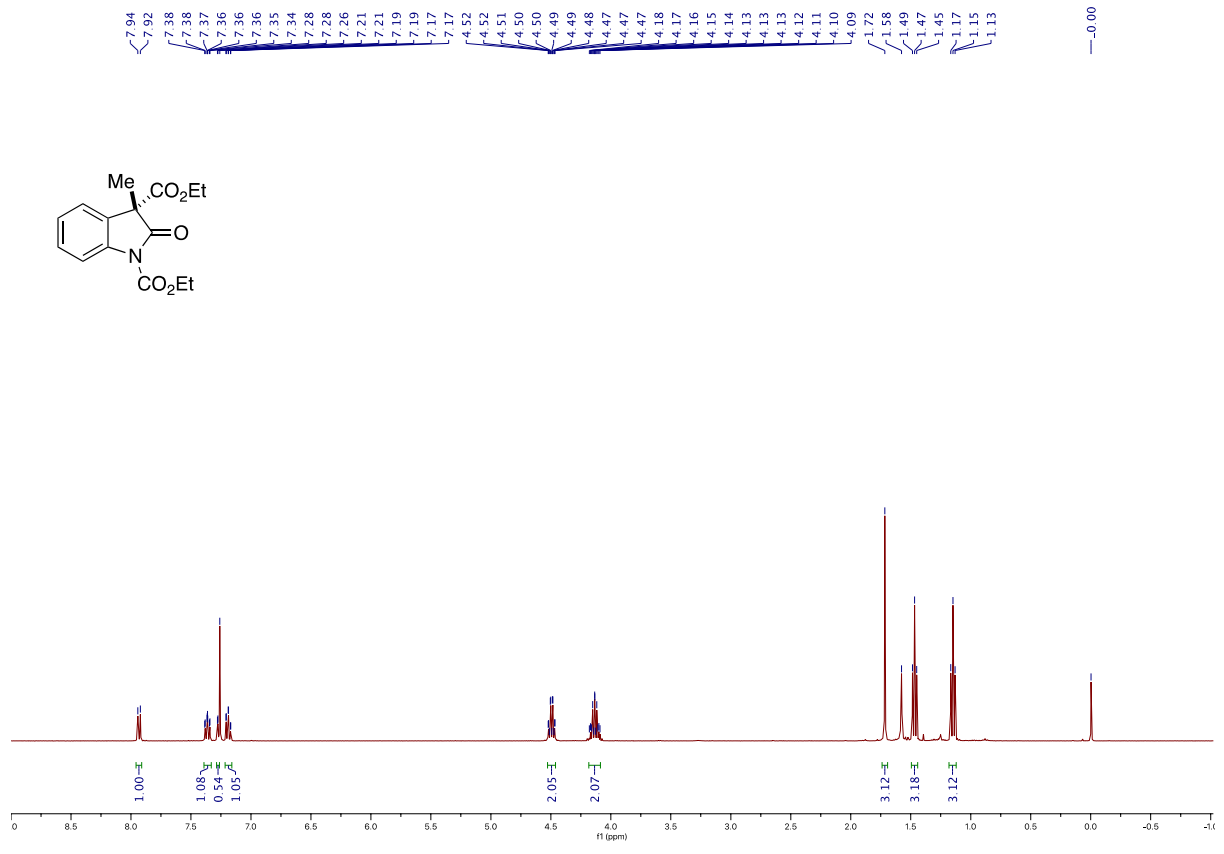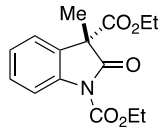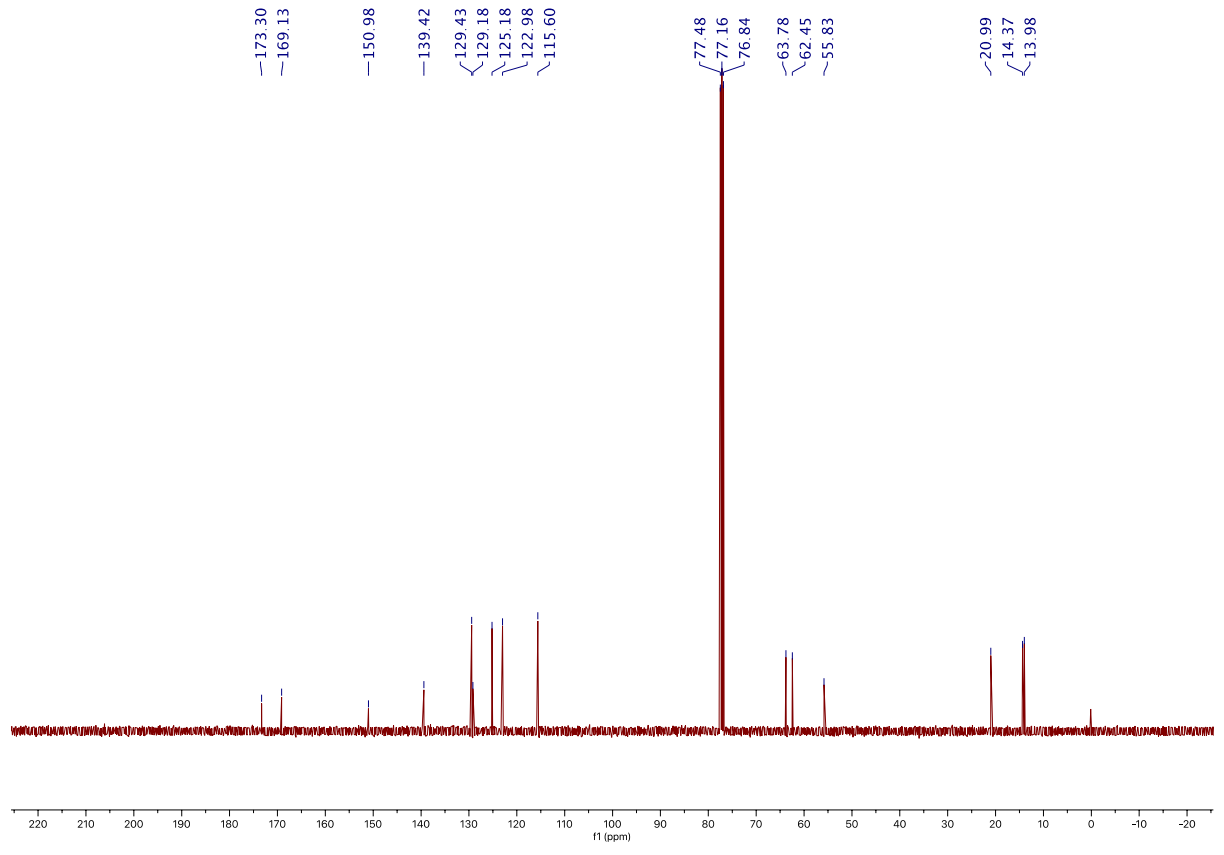

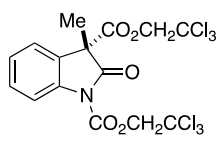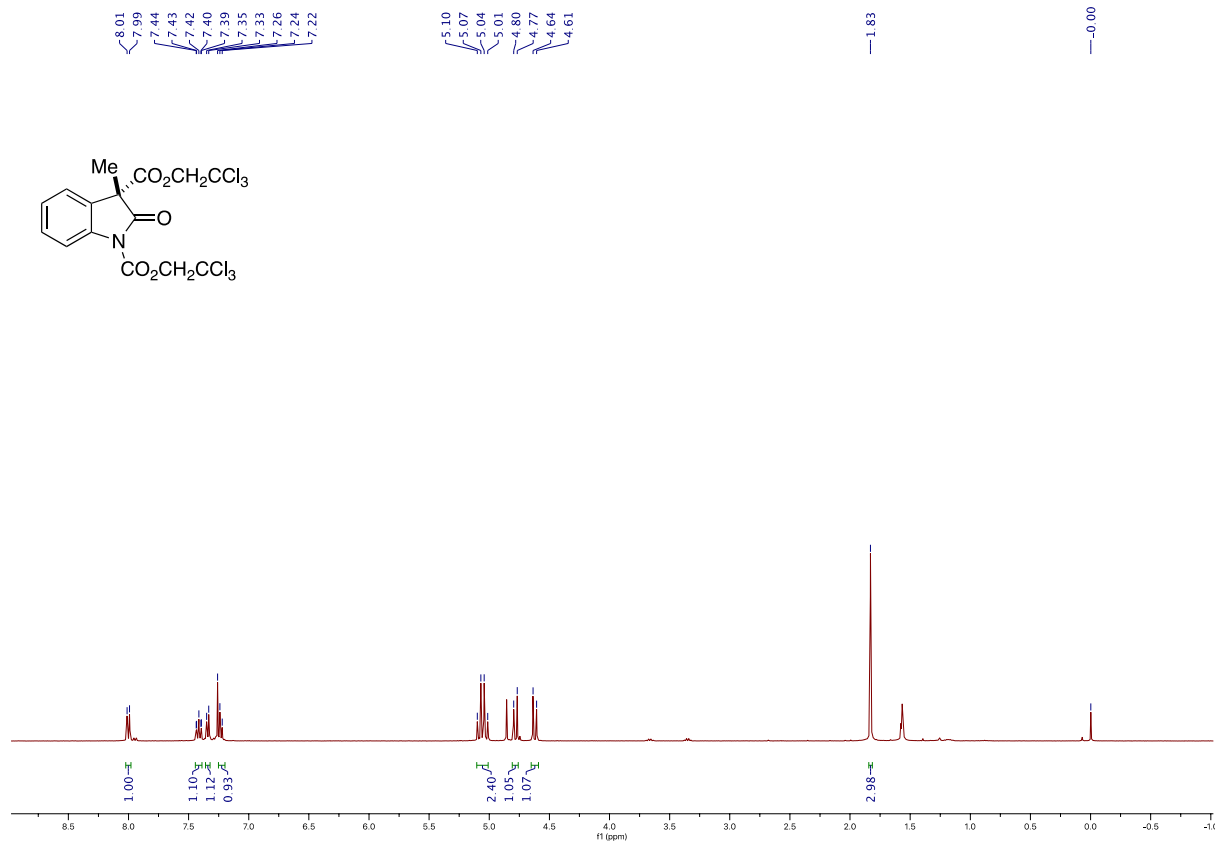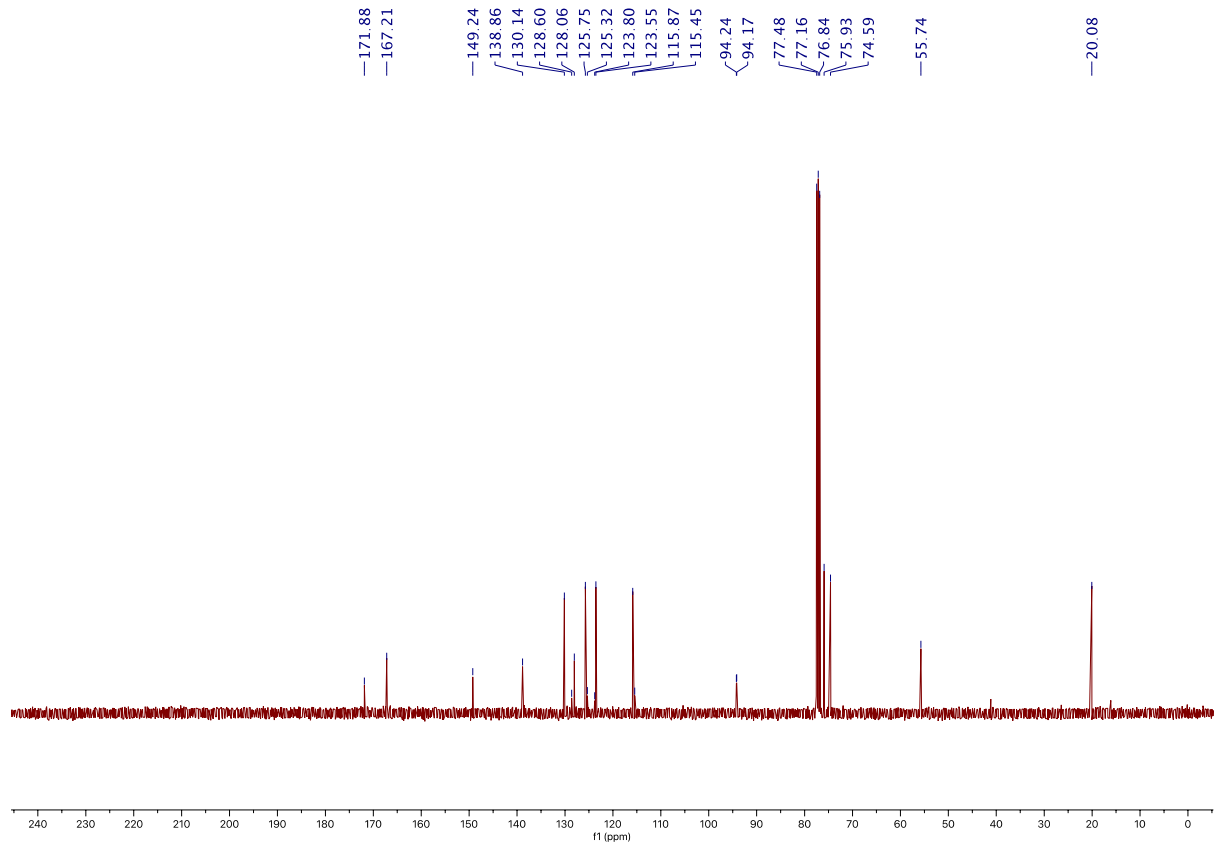

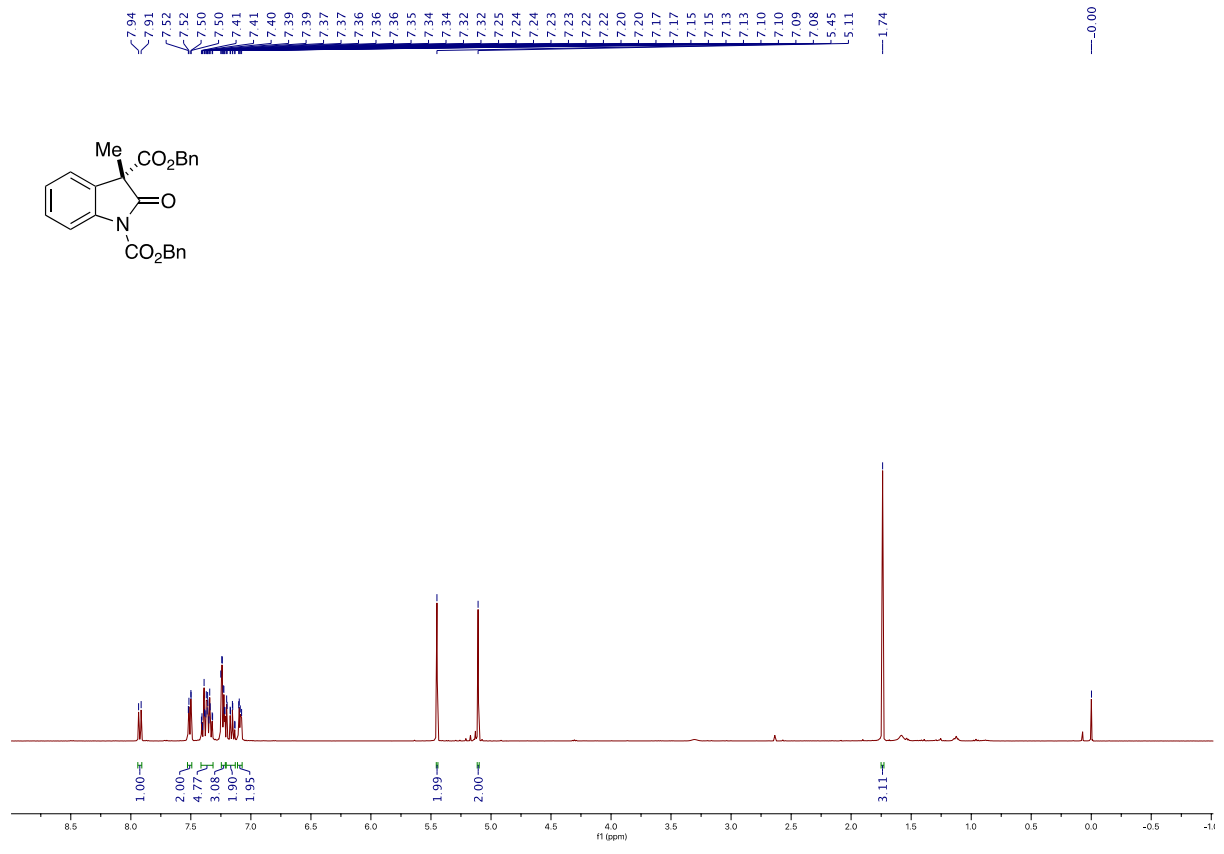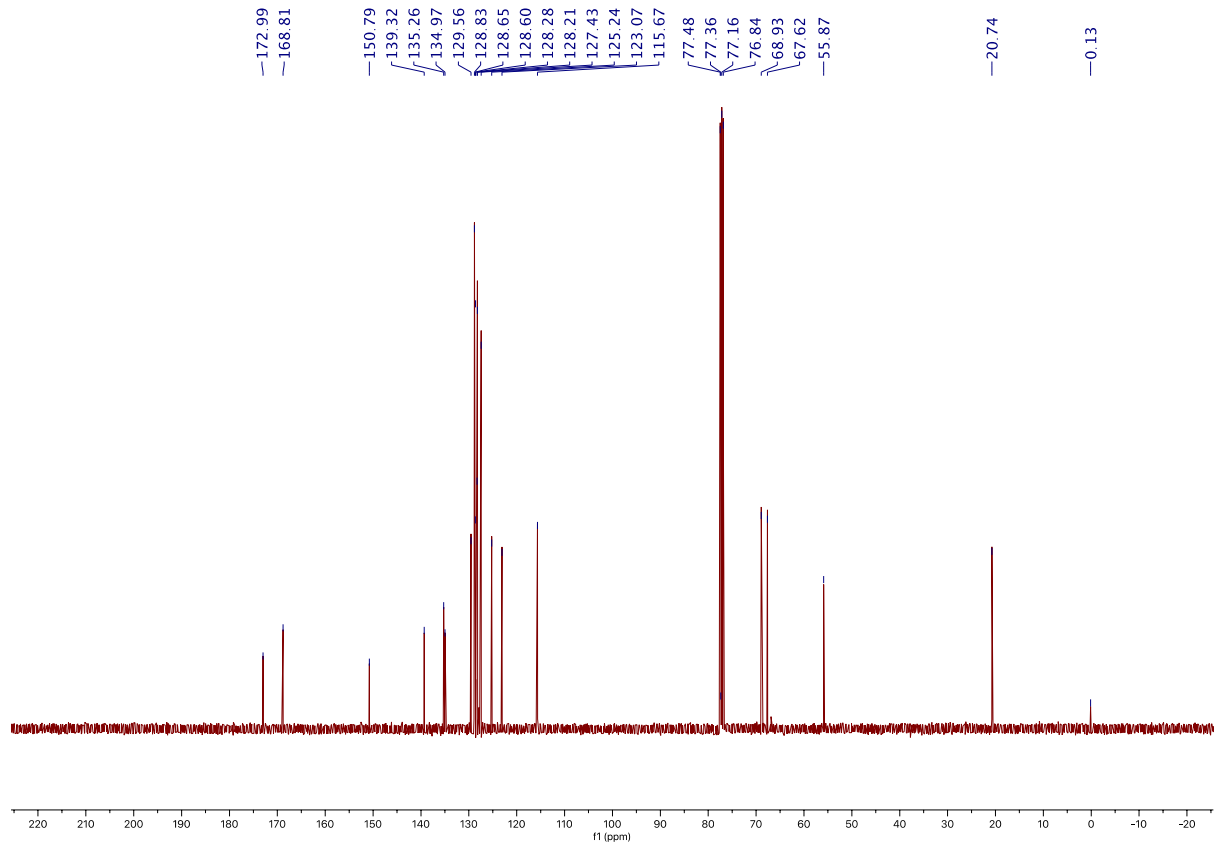

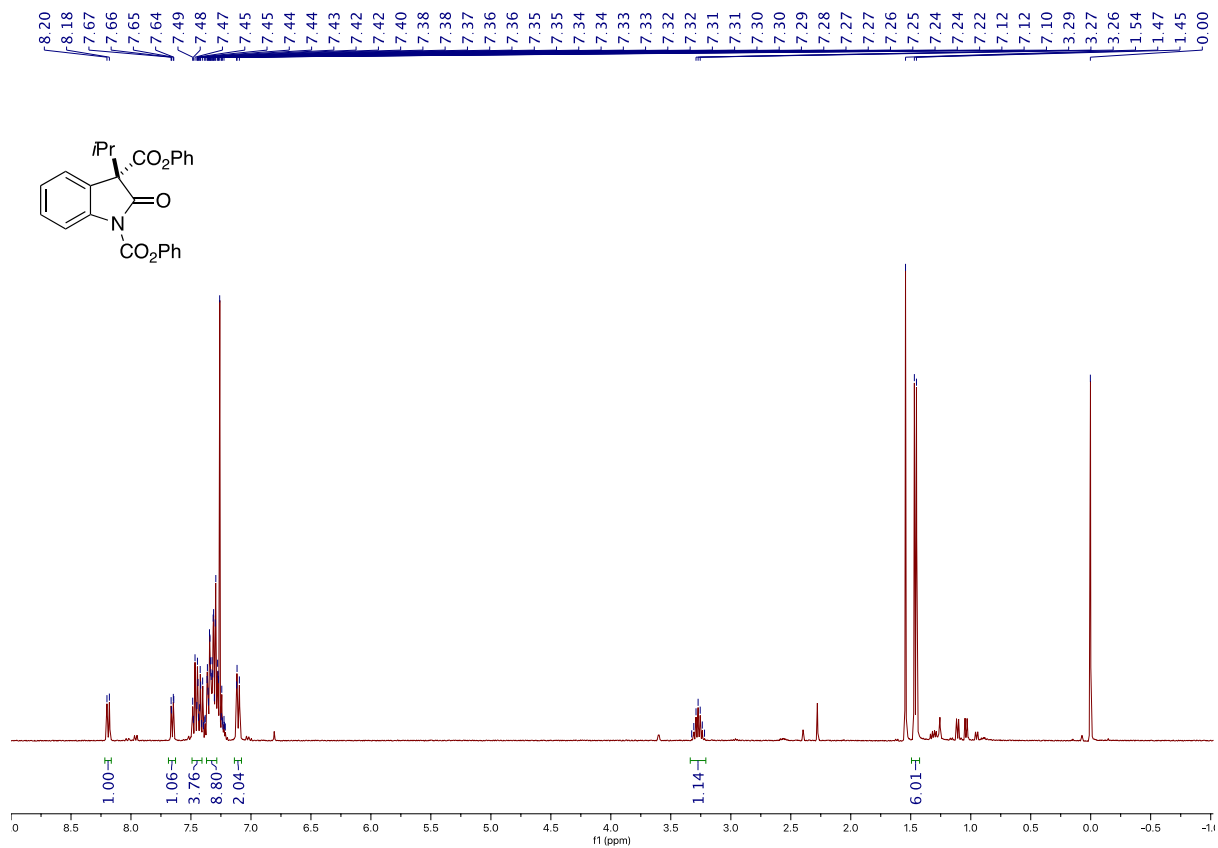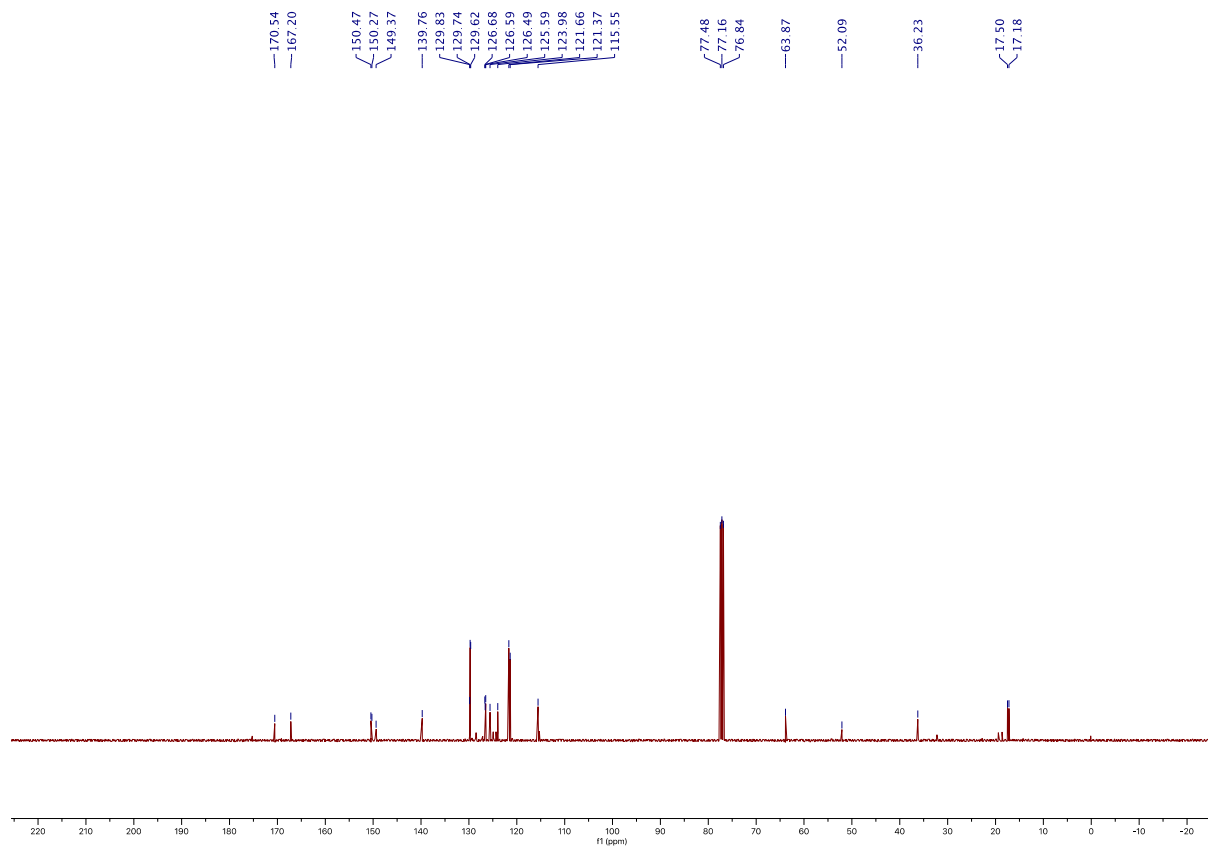

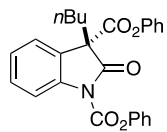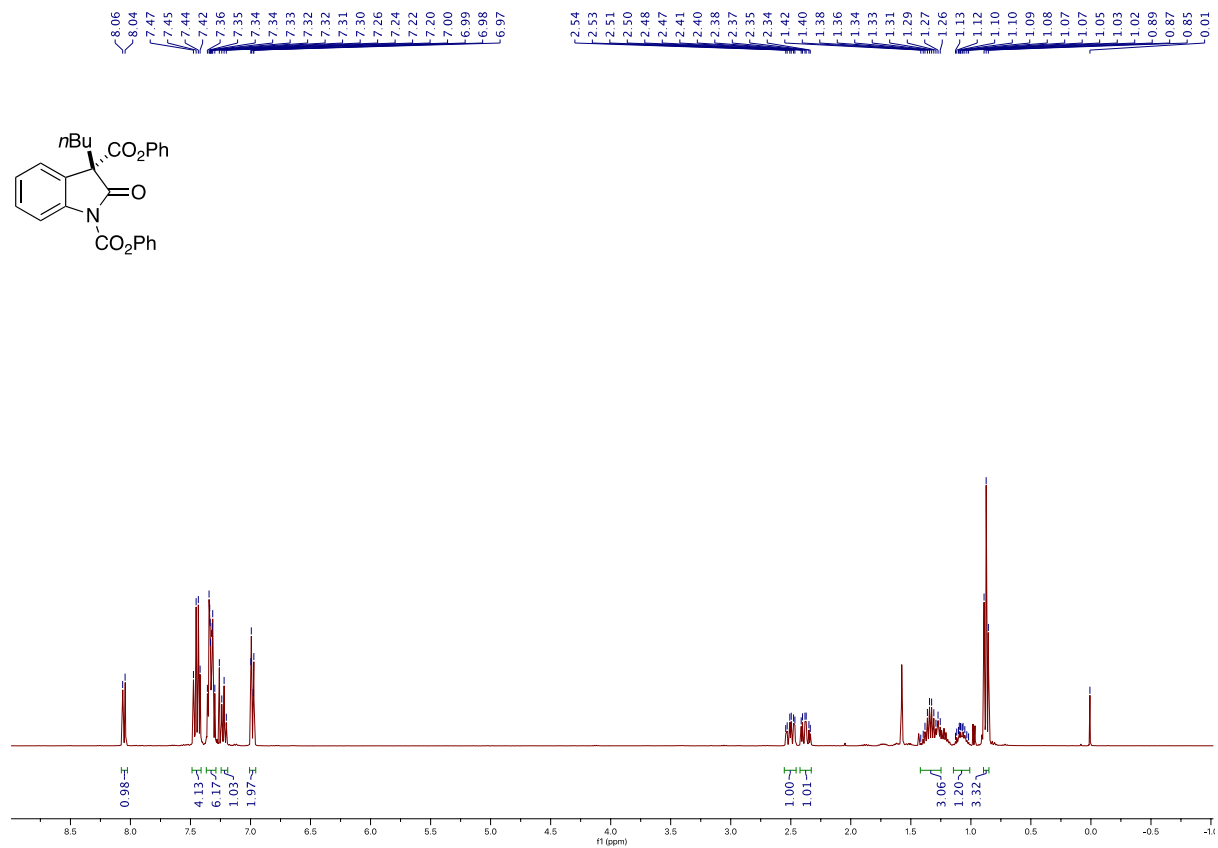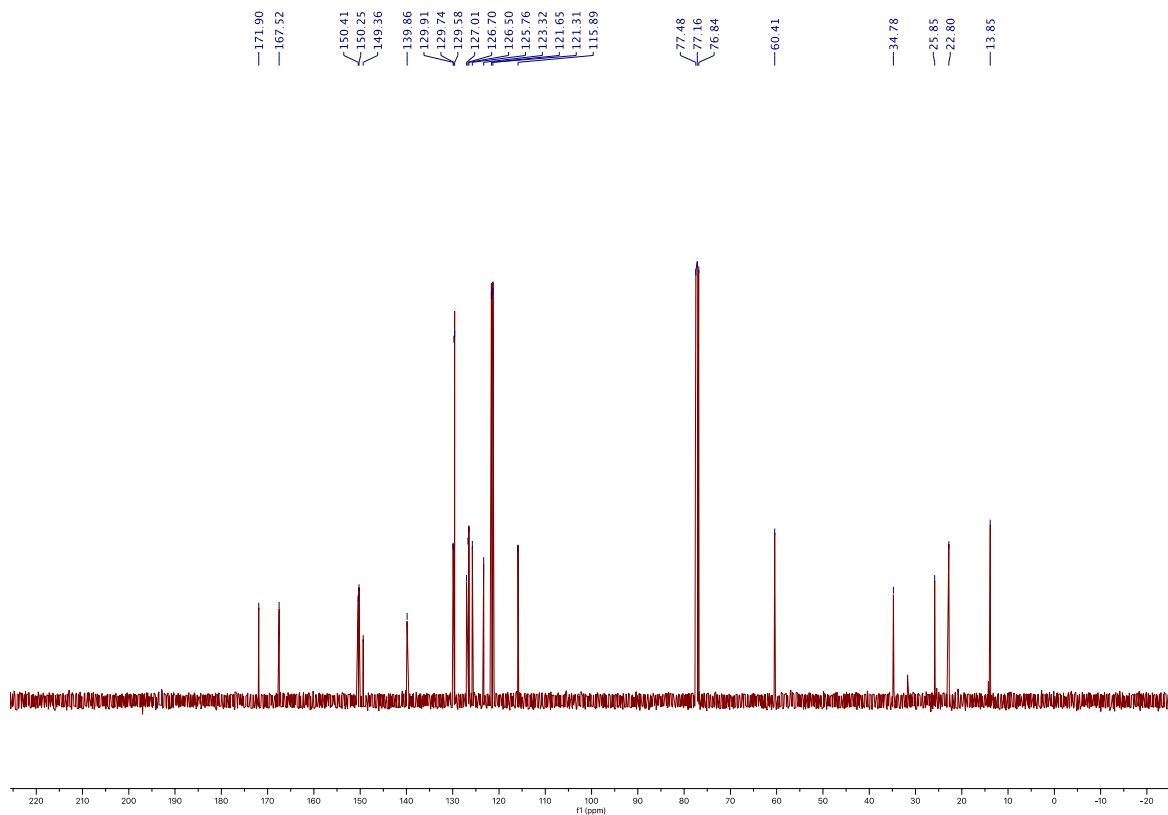

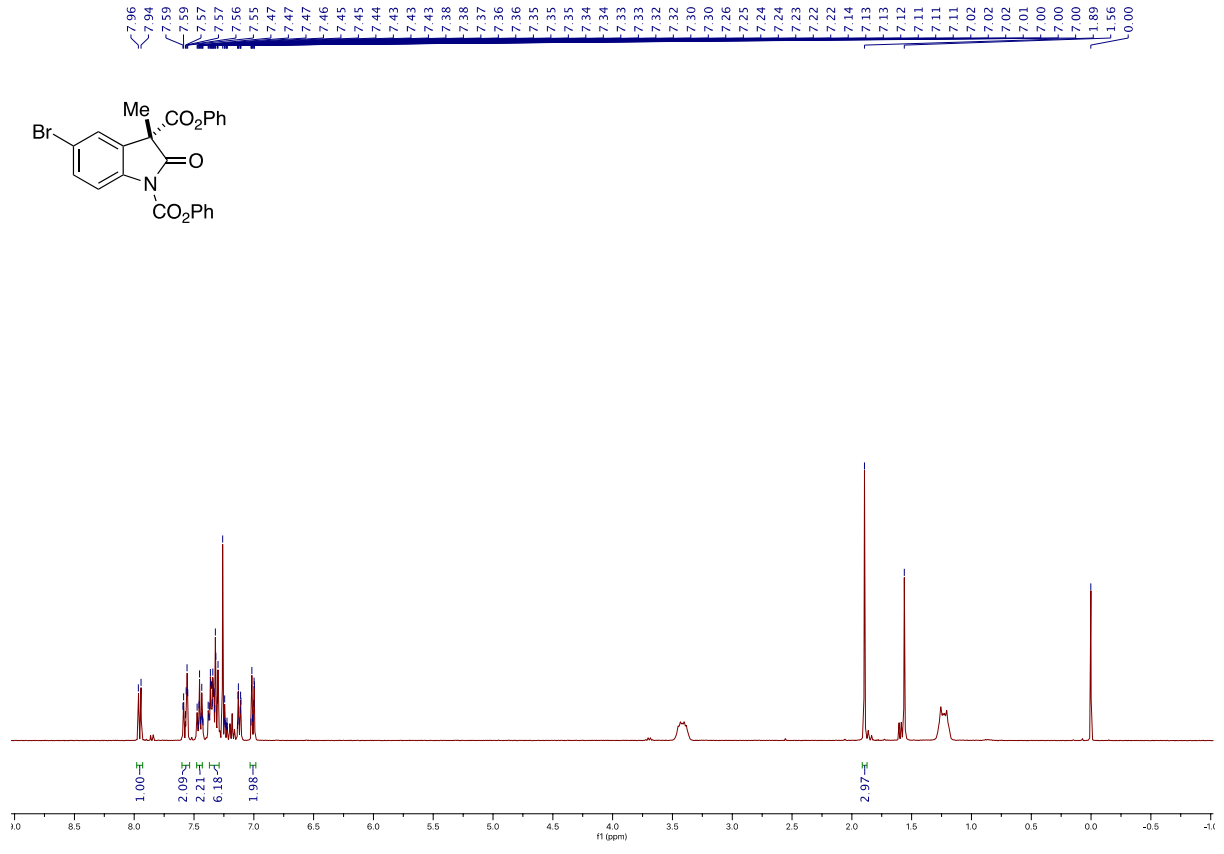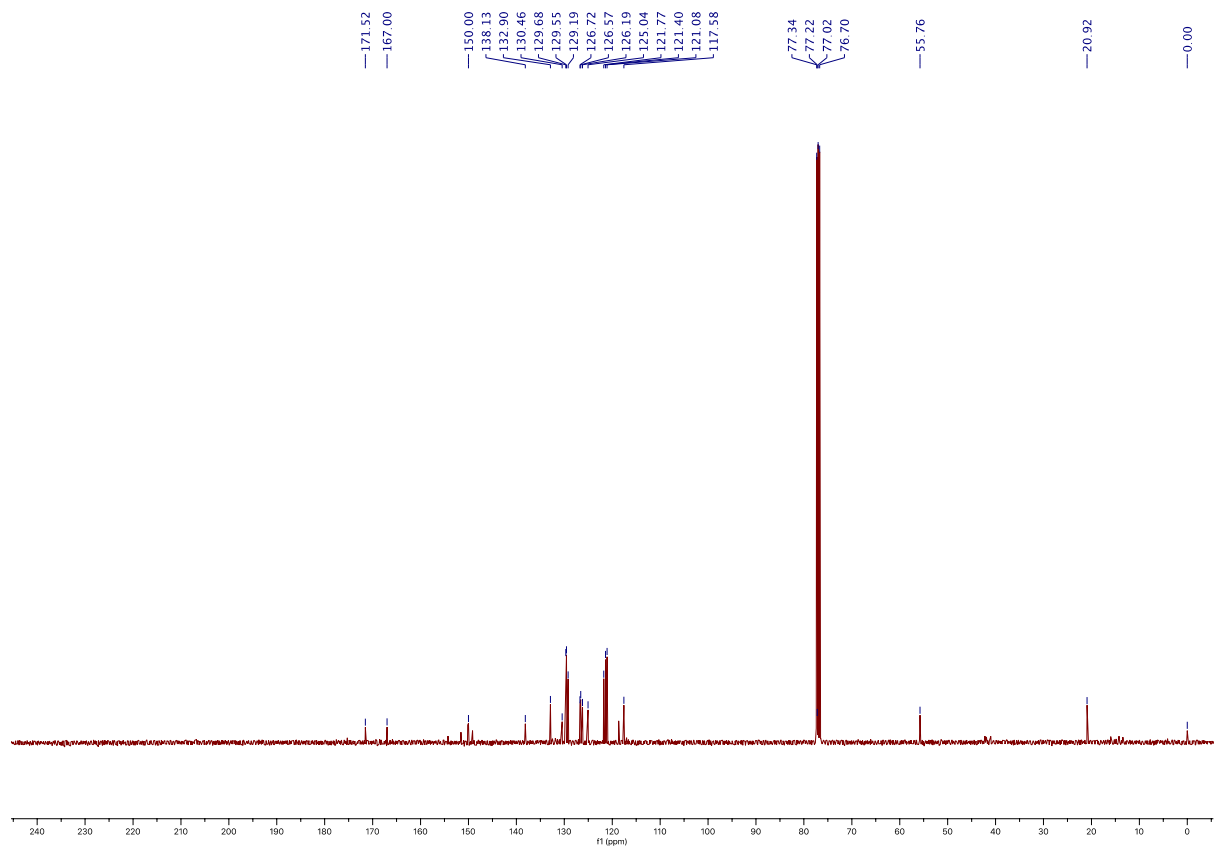

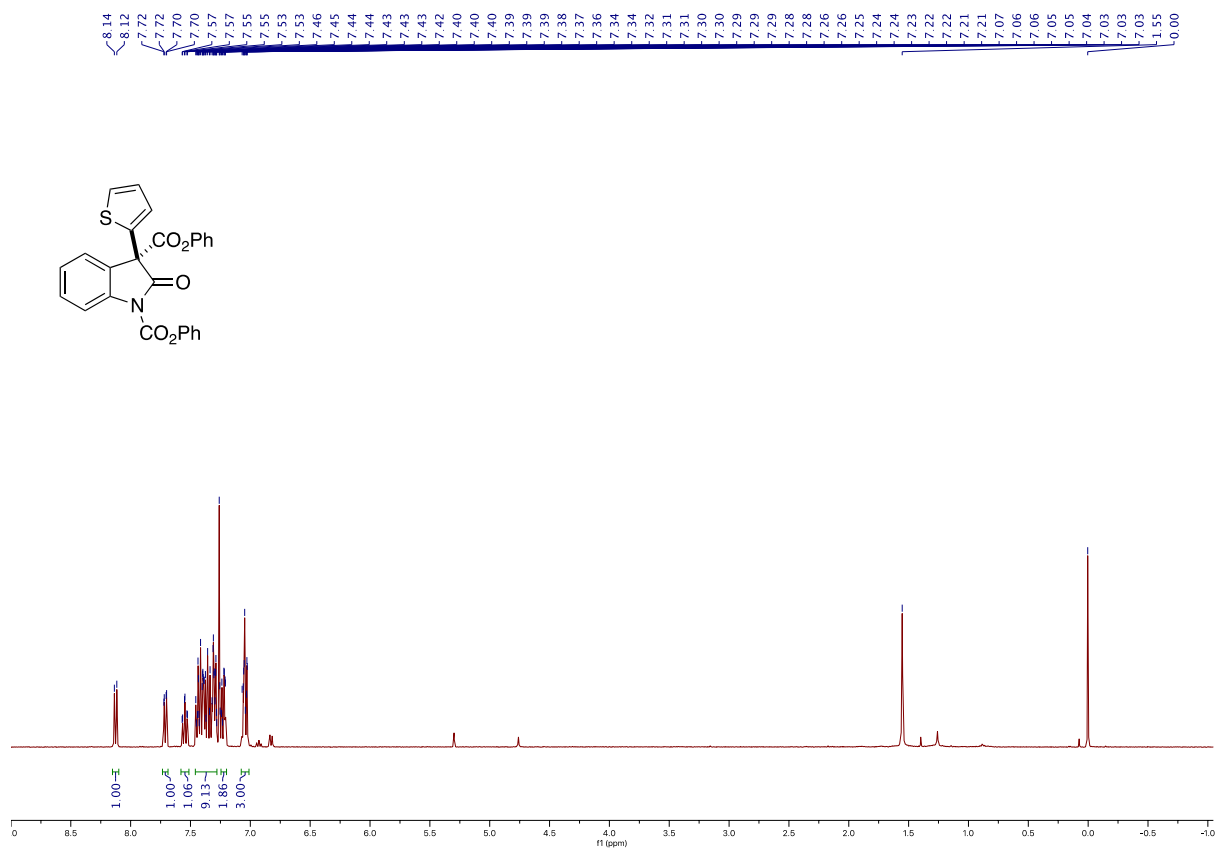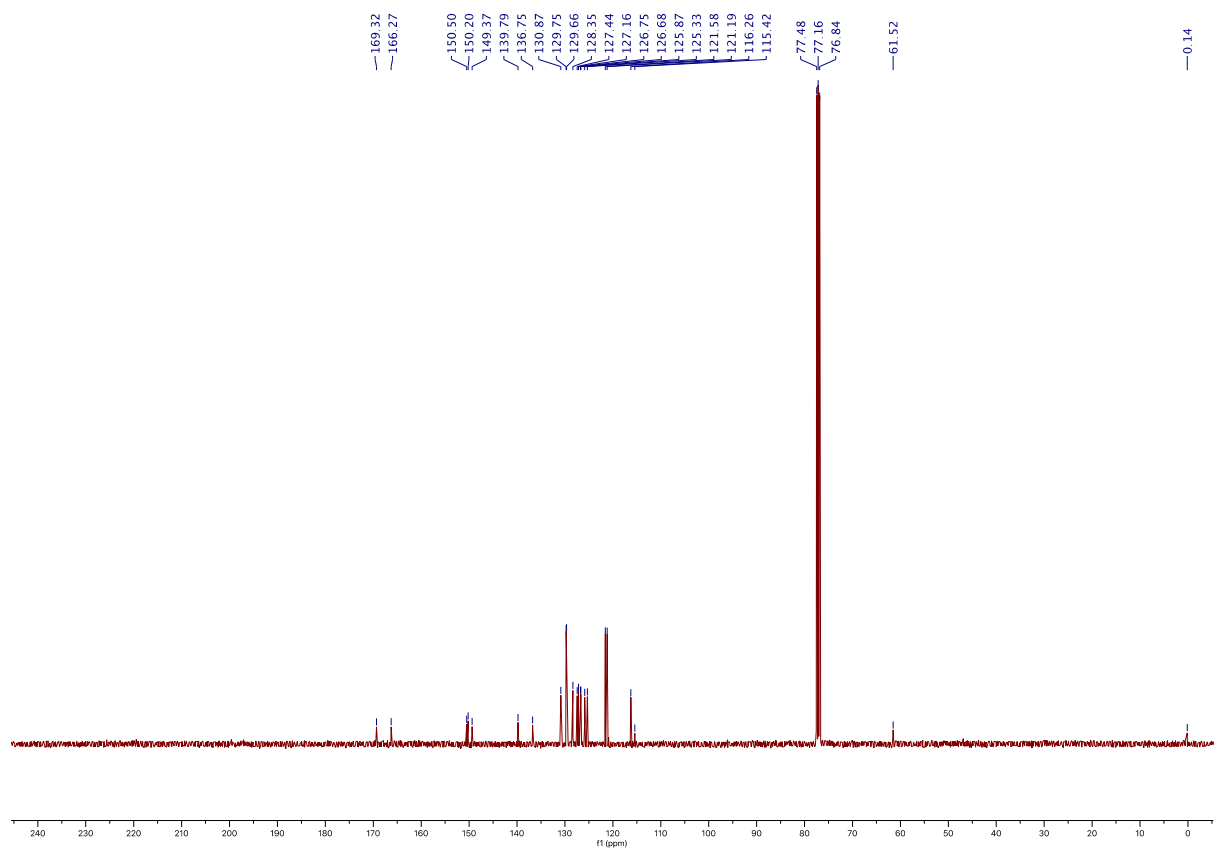

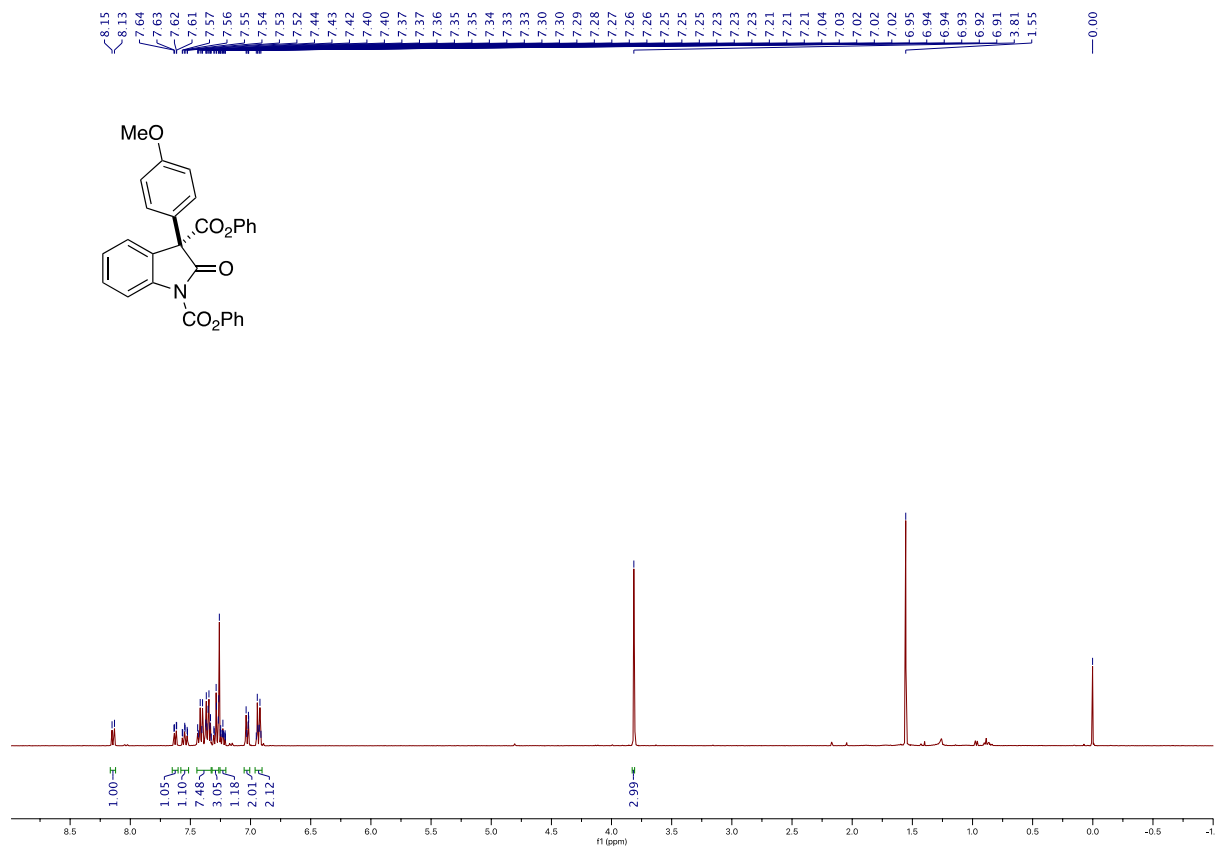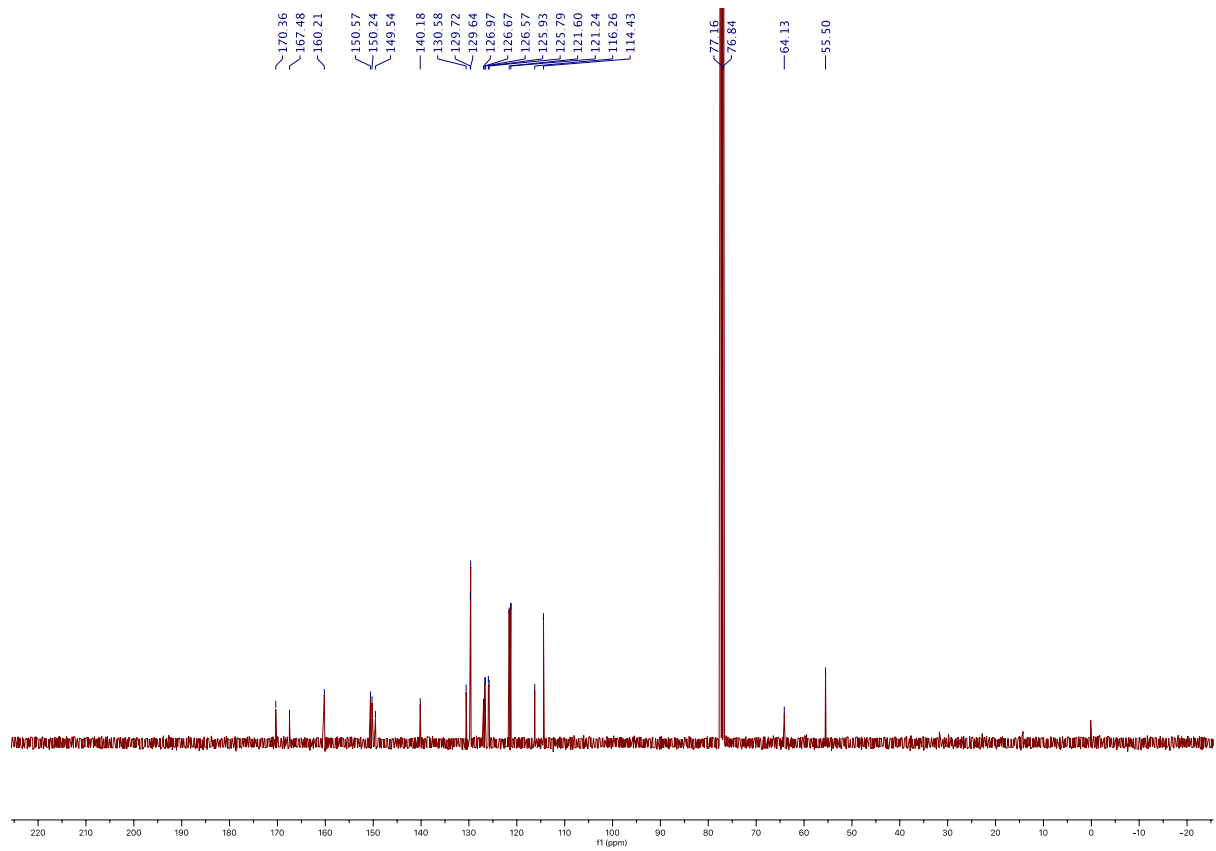



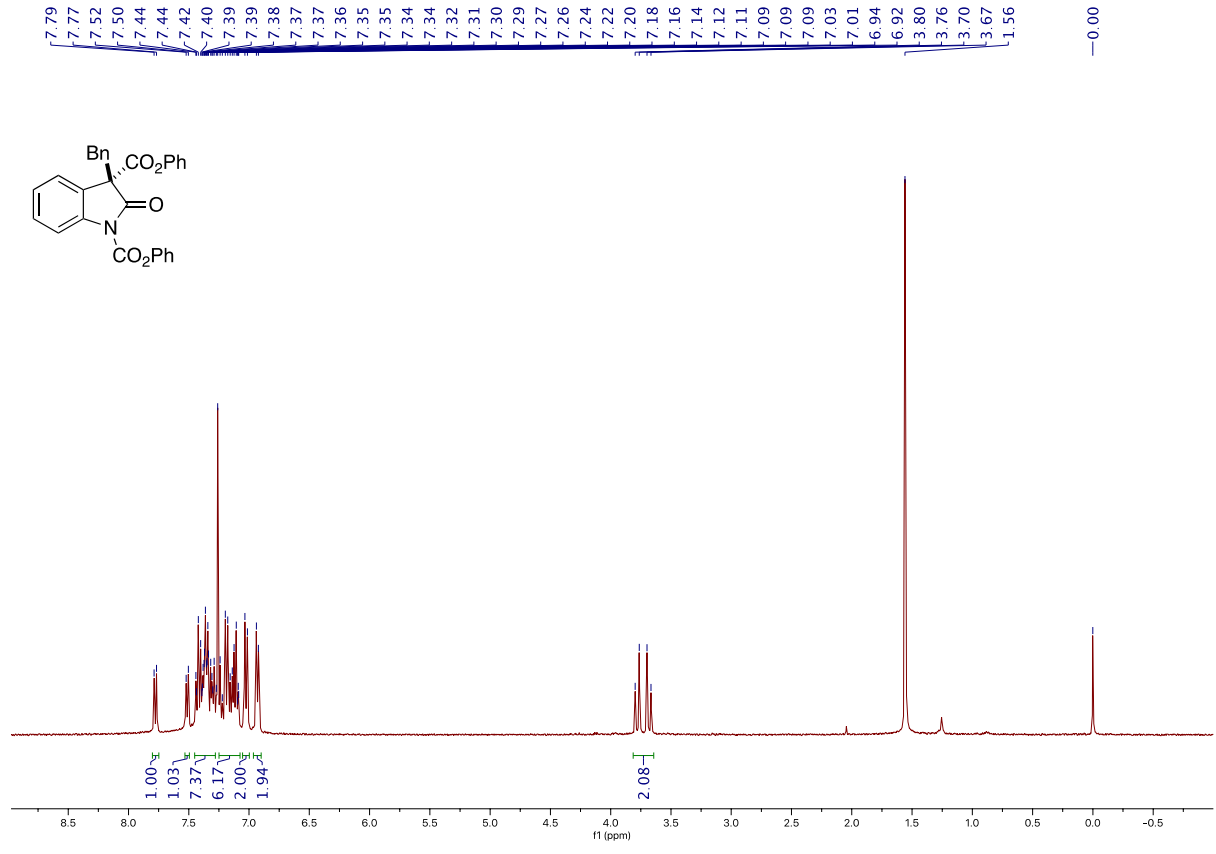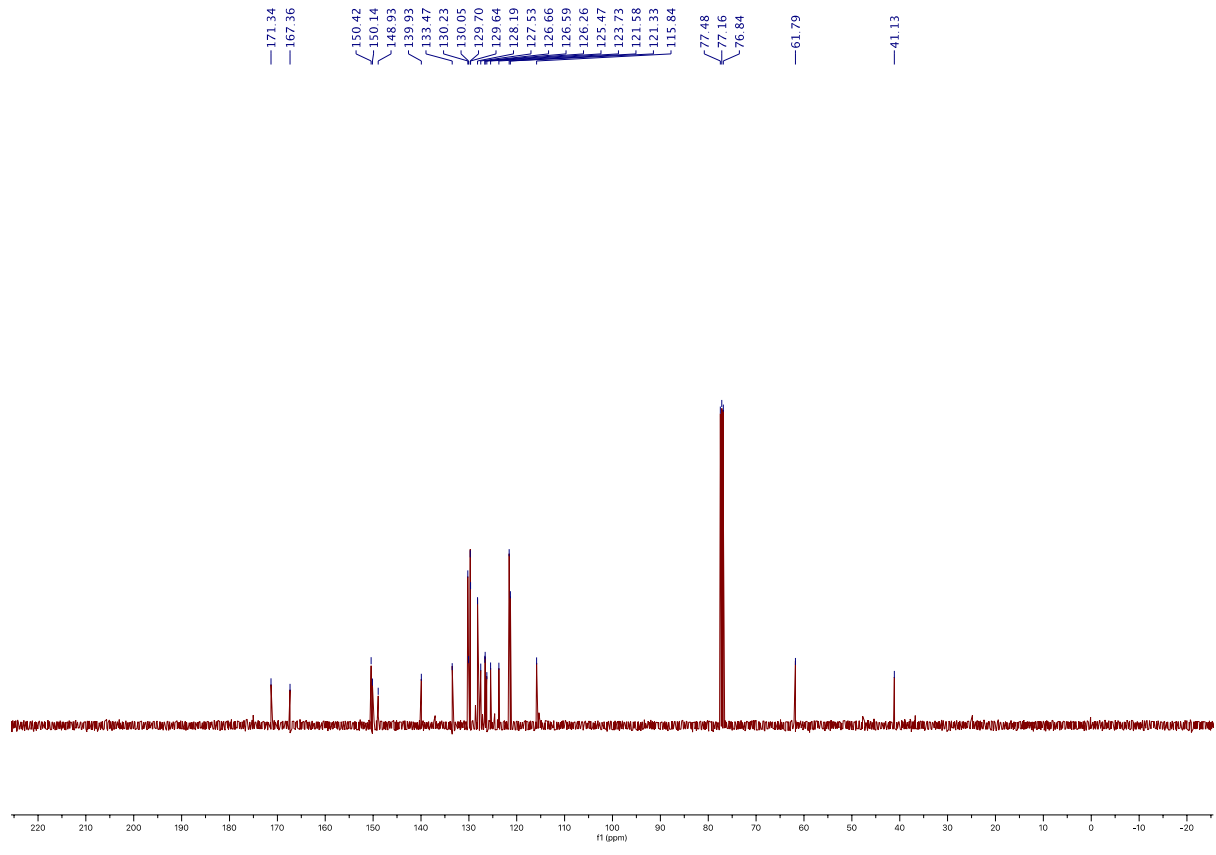

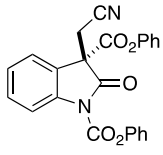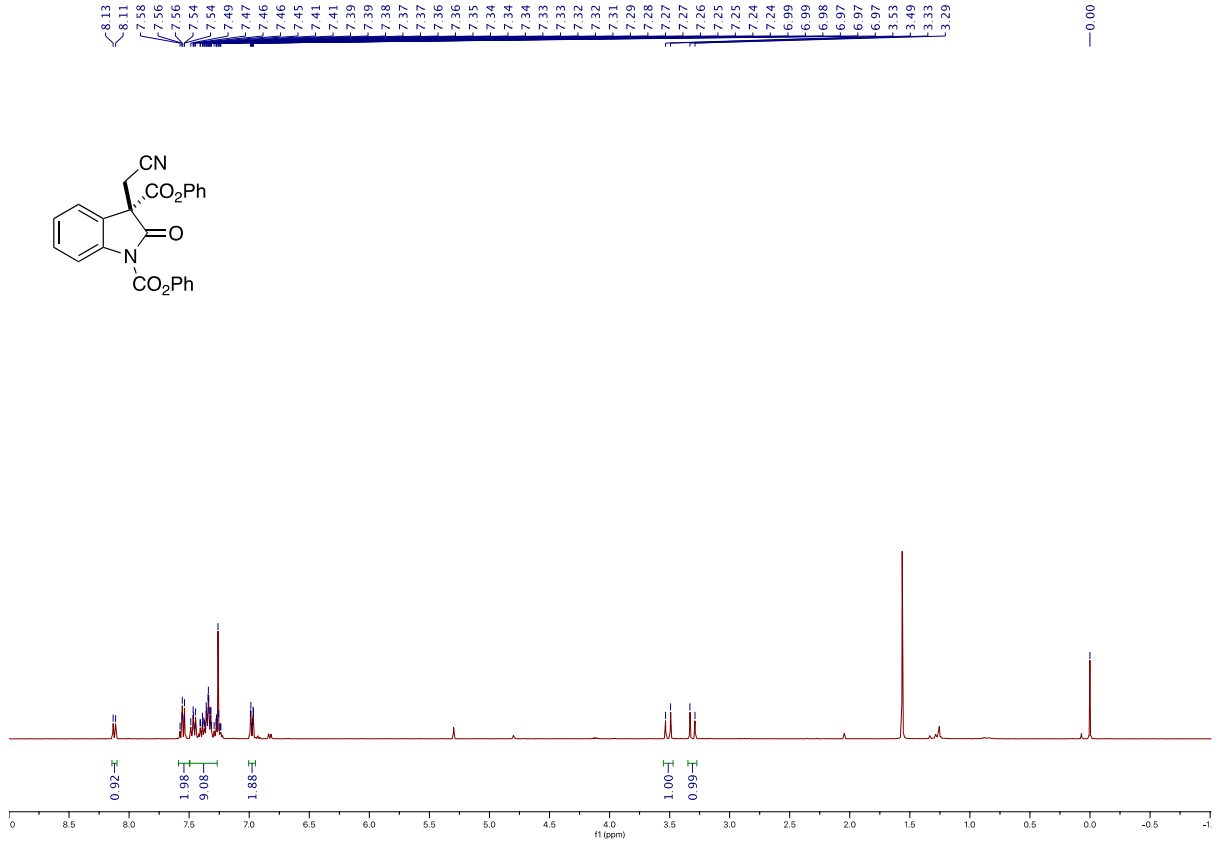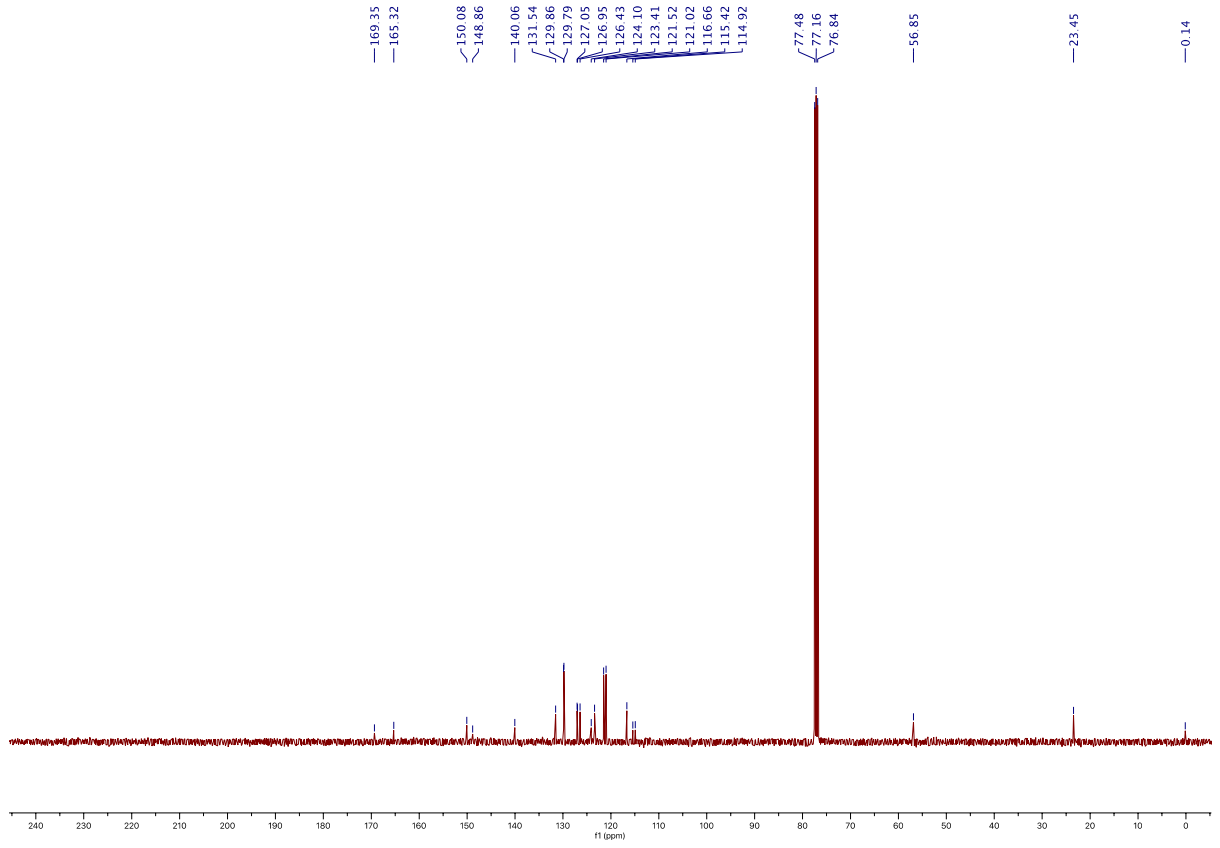

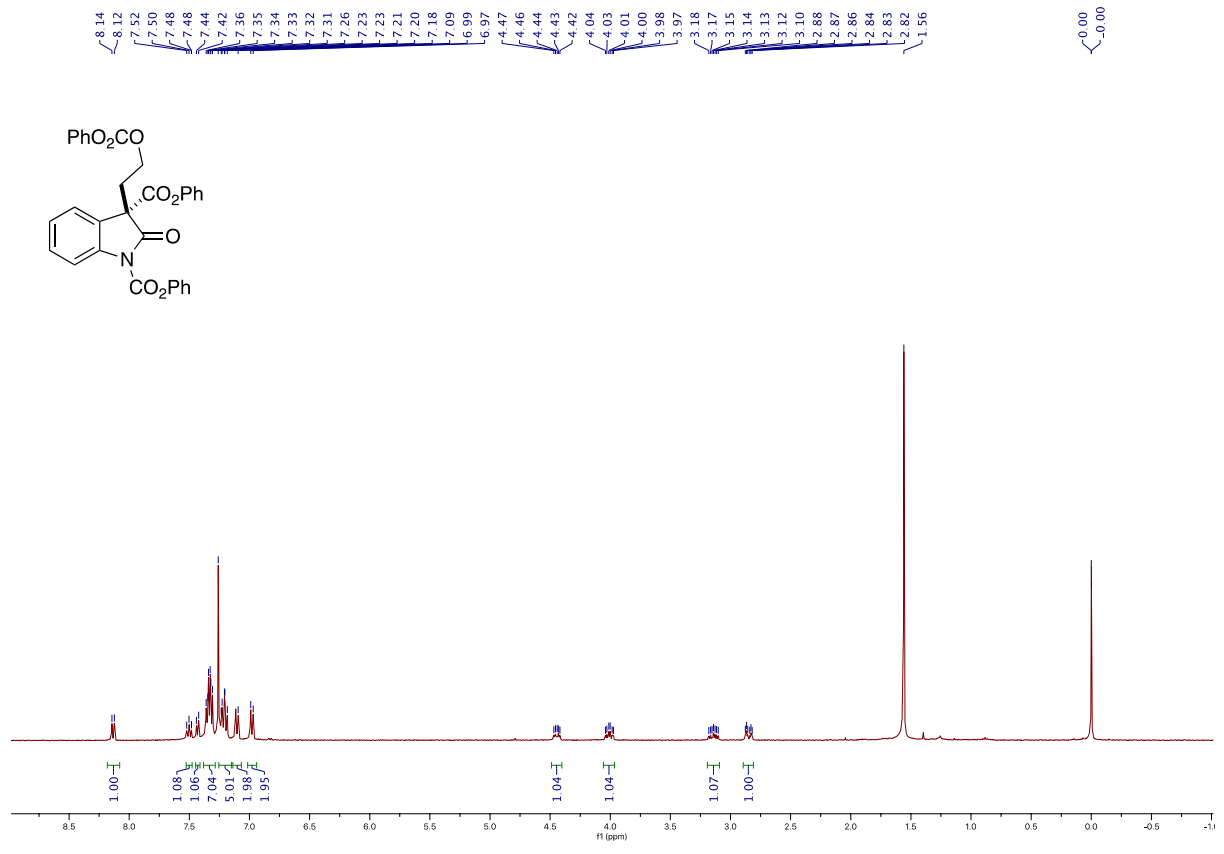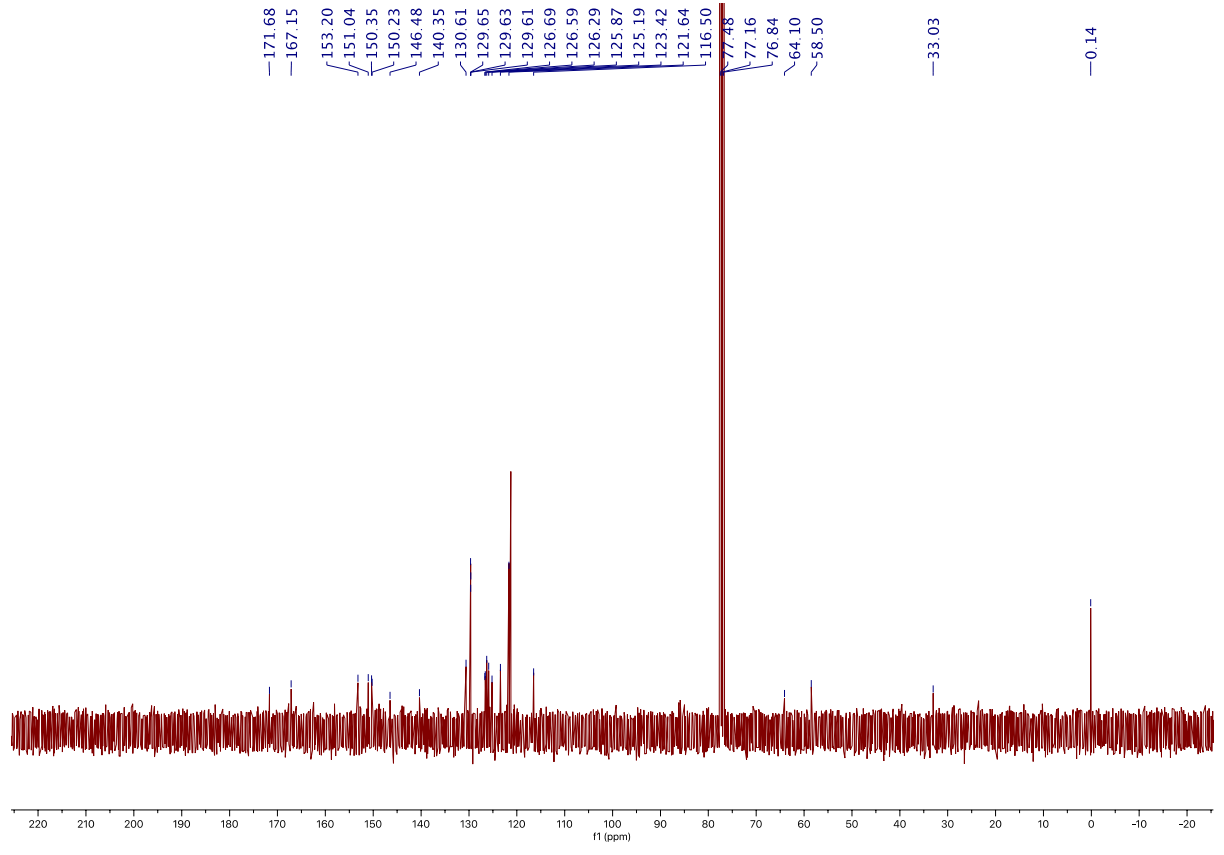

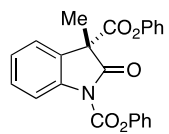

mV

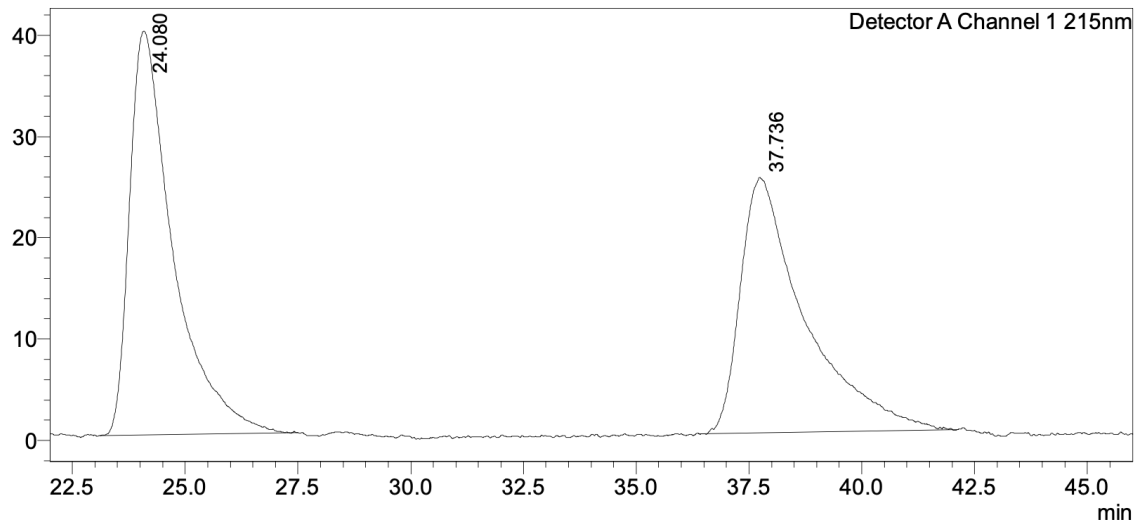

Detector A Channel 1 215nm

| Peak# | Ret. Time | Area    | Area%   |
|-------|-----------|---------|---------|
| 1     | 24.080    | 2669698 | 51.697  |
| 2     | 37.736    | 2494450 | 48.303  |
| Total |           | 5164148 | 100.000 |

mV

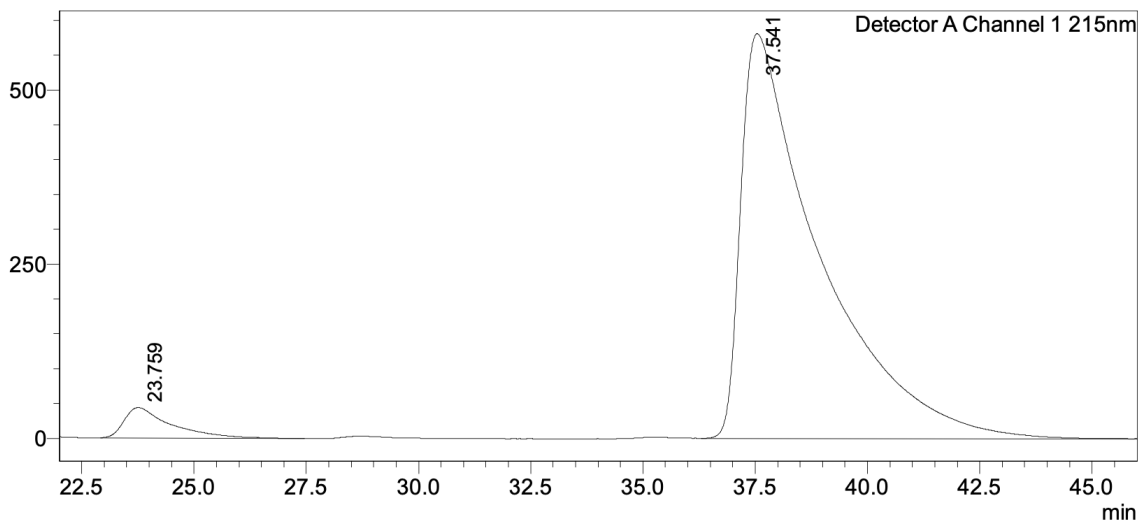

Detector A Channel 1 215nm

| Peak# | Ret. Time | Area     | Area%   |
|-------|-----------|----------|---------|
| 1     | 23.759    | 3167251  | 4.275   |
| 2     | 37.541    | 70920263 | 95.725  |
| Total |           | 74087514 | 100.000 |

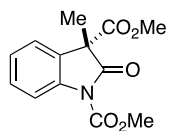

Datafile Name: yzq-R-Me-IG3-95-1.0-3.lcd  
 Sample Name: yzq-R-Me-IG3-95-1.0-3  
 Sample ID: 1

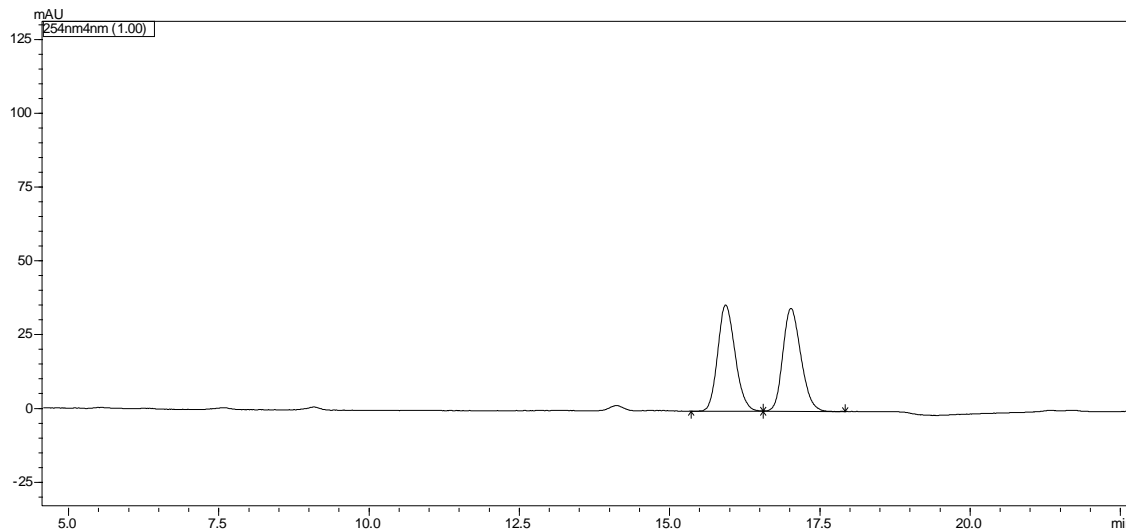

| Peak  | Ret. Time | Area    | Height | Area%   |
|-------|-----------|---------|--------|---------|
| 1     | 15.933    | 728079  | 35958  | 49.814  |
| 2     | 17.021    | 733509  | 34941  | 50.186  |
| Total |           | 1461588 | 70900  | 100.000 |

Datafile Name: yzq-C-COOMe-IG3-95-1.0-2.lcd  
 Sample Name: yzq-C-COOMe-IG3-95-1.0-2  
 Sample ID: 1

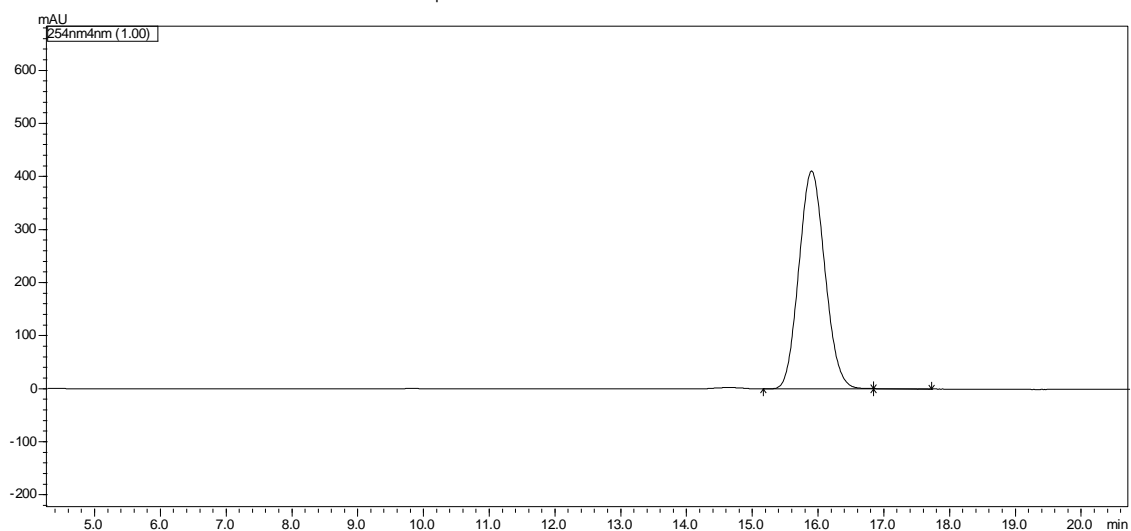

| Peak# | Ret. Time | Area     | Height | Area%   |
|-------|-----------|----------|--------|---------|
| 1     | 15.902    | 11319088 | 411153 | 99.912  |
| 2     | 16.859    | 9971     | 841    | 0.088   |
| Total |           | 11329059 | 411994 | 100.000 |

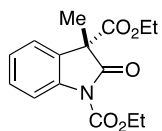

Datafile Name: yzq-R-COOEt-Amy-2-98-1.0.lcd  
 Sample Name: yzq-R-COOEt-Amy-2-98-1.0  
 Sample ID: 1

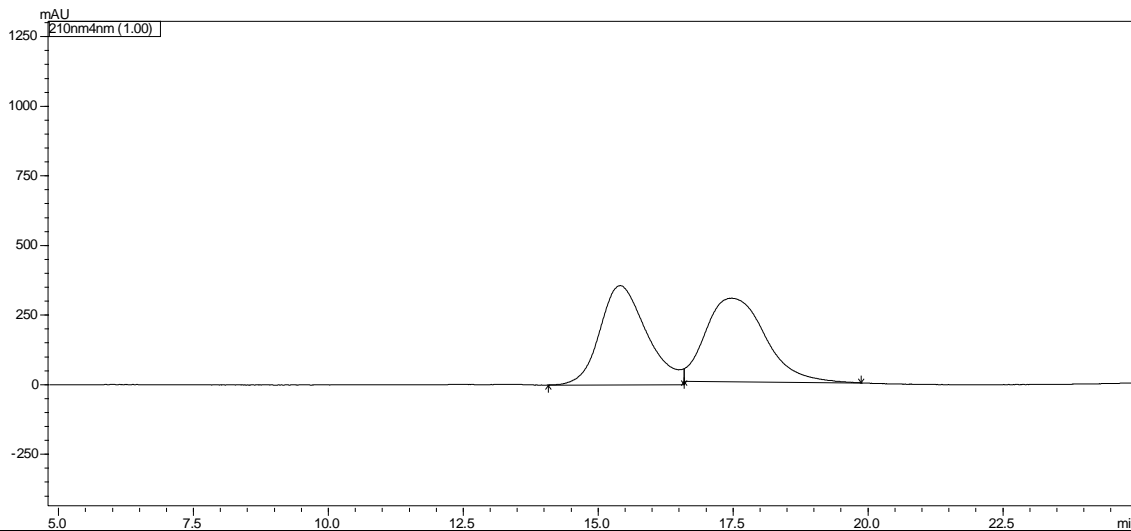

| Peak# | Ret. Time | Area     | Height | Area%   |
|-------|-----------|----------|--------|---------|
| 1     | 15.406    | 21734049 | 357149 | 48.423  |
| 2     | 17.440    | 23150074 | 300064 | 51.577  |
| Total |           | 44884123 | 657213 | 100.000 |

Datafile Name: yzq-C-COOEt-Amy-2-98-1.0.lcd  
 Sample Name: yzq-C-COOEt-Amy-2-98-1.0  
 Sample ID: 1

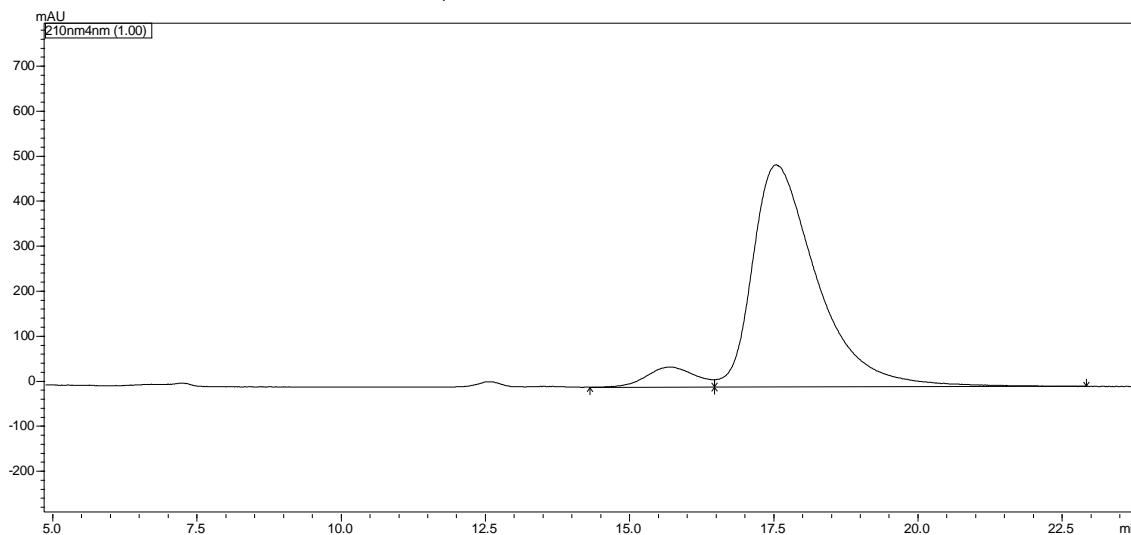

| Peak# | Ret. Time | Area     | Height | Area%   |
|-------|-----------|----------|--------|---------|
| 1     | 15.684    | 2648357  | 44807  | 6.462   |
| 2     | 17.547    | 38333899 | 494271 | 93.538  |
| Total |           | 40982256 | 539078 | 100.000 |

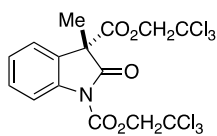

Datafile Name: yzq-R-CCI3-90-1.0.lcd  
 Sample Name: yzq-R-CCI3-90-1.0  
 Sample ID: 1

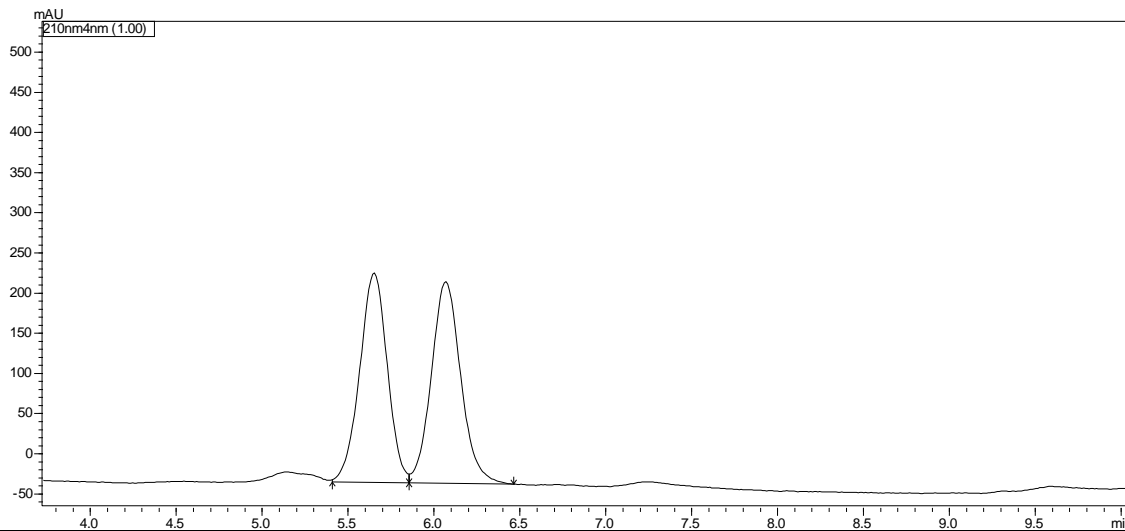

| Peak# | Ret. Time | Area    | Height | Area%   |
|-------|-----------|---------|--------|---------|
| 1     | 5.651     | 2912816 | 260678 | 49.367  |
| 2     | 6.068     | 2987467 | 250846 | 50.633  |
| Total |           | 5900283 | 511523 | 100.000 |

Datafile Name: yzq-C-CCI3-ODH-90-1.0-3.lcd  
 Sample Name: yzq-C-CCI3-ODH-90-1.0-3  
 Sample ID: 1

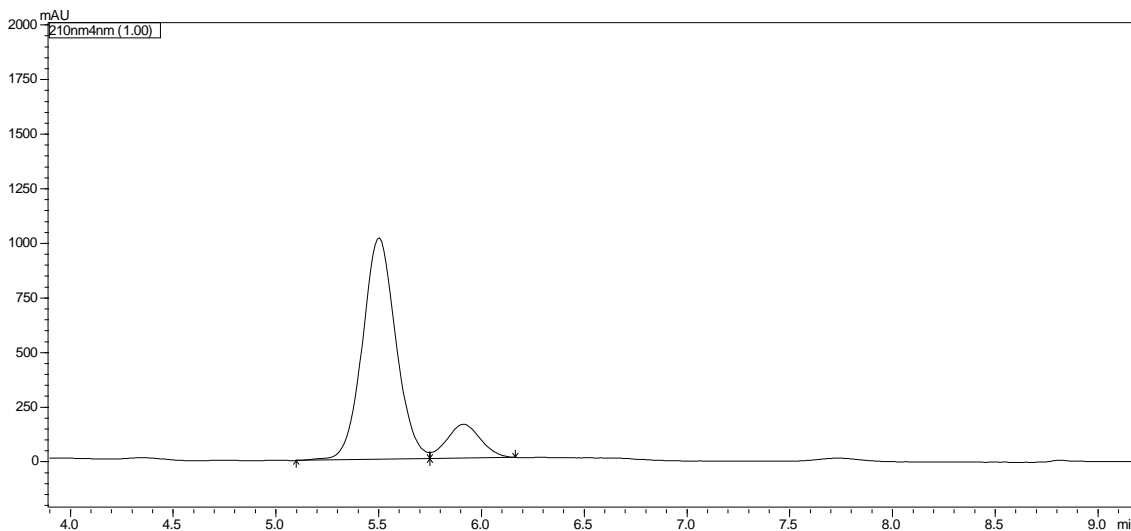

| Peak# | Ret. Time | Area     | Height  | Area%   |
|-------|-----------|----------|---------|---------|
| 1     | 5.501     | 11500165 | 1015124 | 86.641  |
| 2     | 5.914     | 1773175  | 154708  | 13.359  |
| Total |           | 13273340 | 1169832 | 100.000 |

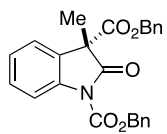

mV

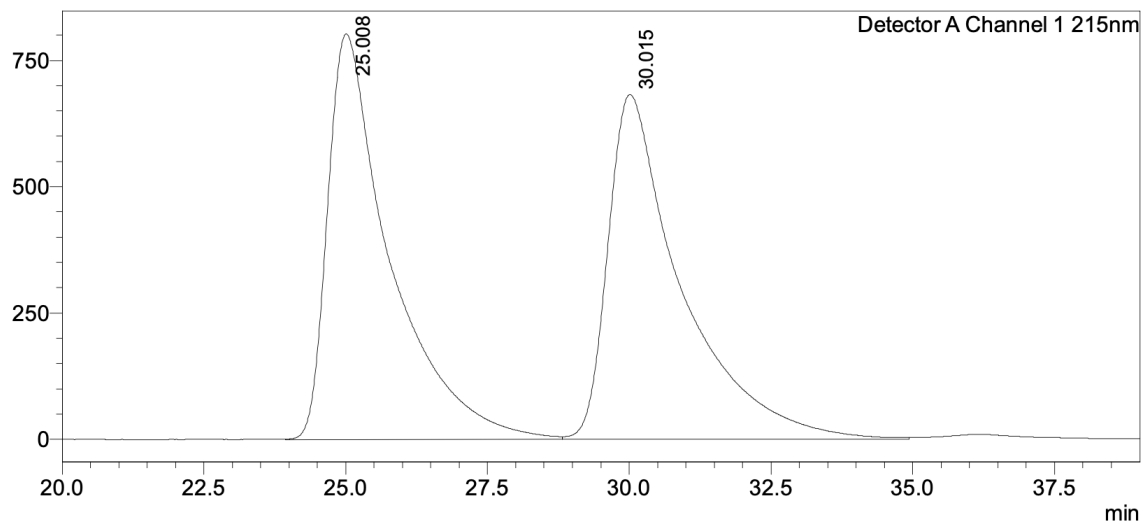

Detector A Channel 1 215nm

| Peak# | Ret. Time | Area      | Area%   |
|-------|-----------|-----------|---------|
| 1     | 25.008    | 61536117  | 50.039  |
| 2     | 30.015    | 61439966  | 49.961  |
| Total |           | 122976083 | 100.000 |

mV

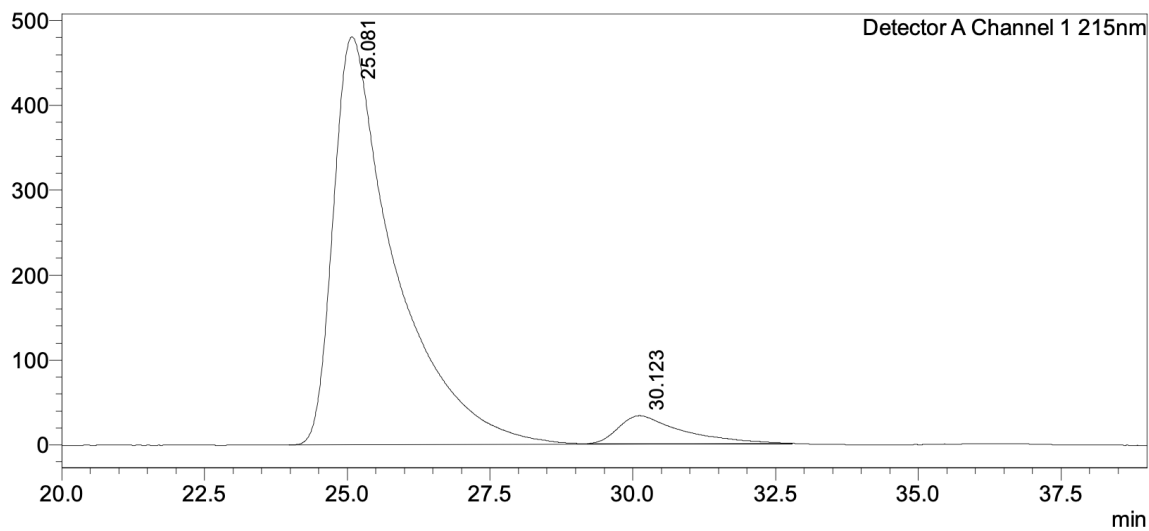

Detector A Channel 2 254nm

| Peak# | Ret. Time | Area    | Area%   |
|-------|-----------|---------|---------|
| 1     | 25.082    | 2460999 | 93.856  |
| 2     | 30.100    | 161106  | 6.144   |
| Total |           | 2622105 | 100.000 |



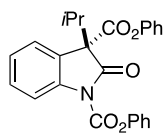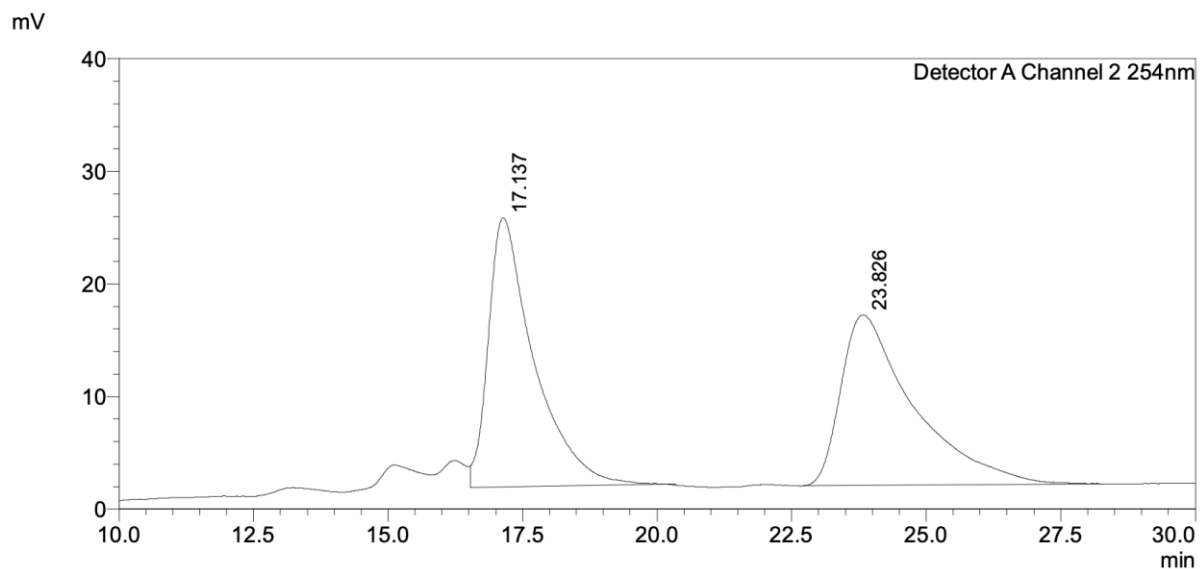

| Detector A Channel 2 254nm |           |         |         |
|----------------------------|-----------|---------|---------|
| Peak#                      | Ret. Time | Area    | Area%   |
| 1                          | 17.137    | 1408131 | 49.741  |
| 2                          | 23.826    | 1422795 | 50.259  |
| Total                      |           | 2830925 | 100.000 |

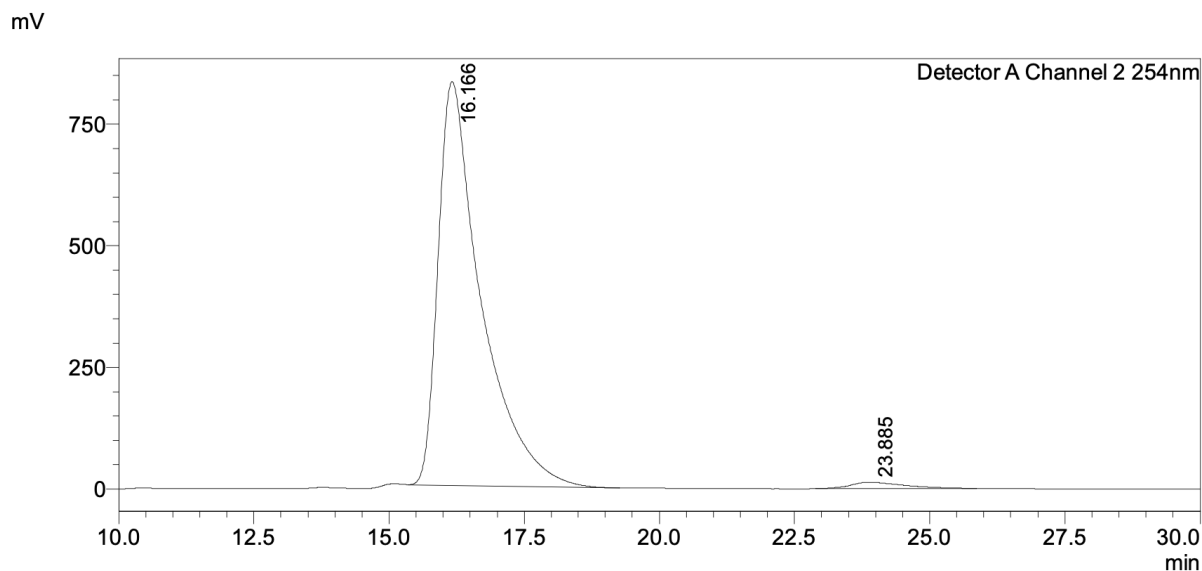

| Detector A Channel 2 254nm |           |          |         |
|----------------------------|-----------|----------|---------|
| Peak#                      | Ret. Time | Area     | Area%   |
| 1                          | 16.166    | 46003423 | 98.070  |
| 2                          | 23.885    | 905213   | 1.930   |
| Total                      |           | 46908636 | 100.000 |

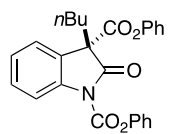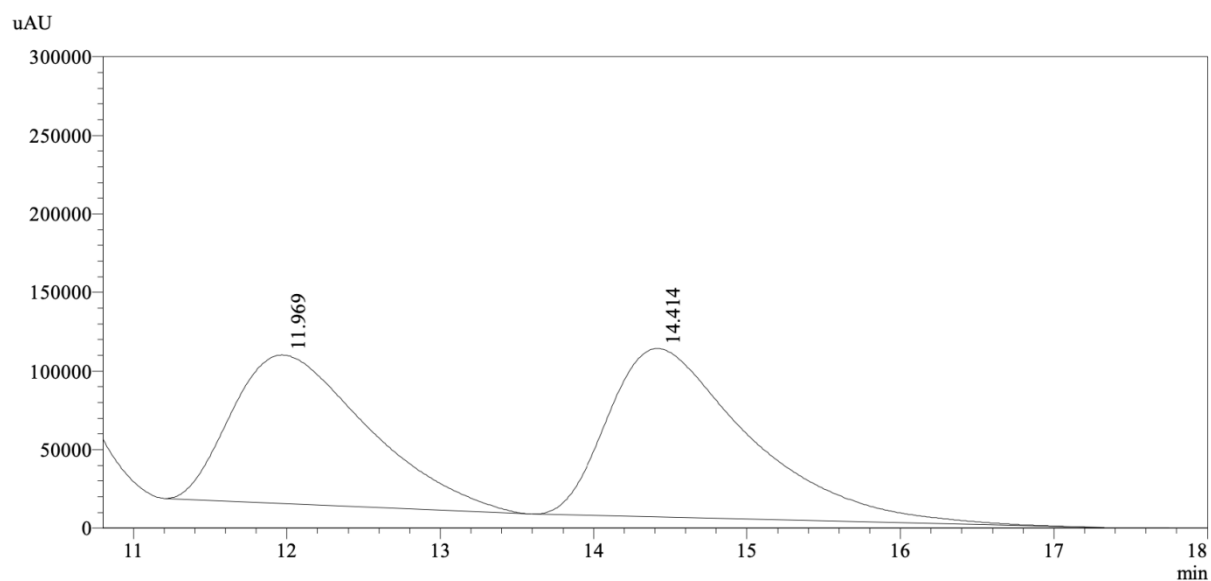

Peak Table

| PDA Ch1 210nm |           |        |          |         |
|---------------|-----------|--------|----------|---------|
| Peak#         | Ret. Time | Height | Area     | Area%   |
| 1             | 11.973    | 167926 | 10516360 | 46.668  |
| 2             | 14.416    | 184677 | 12018254 | 53.332  |
| Total         |           | 352603 | 22534614 | 100.000 |

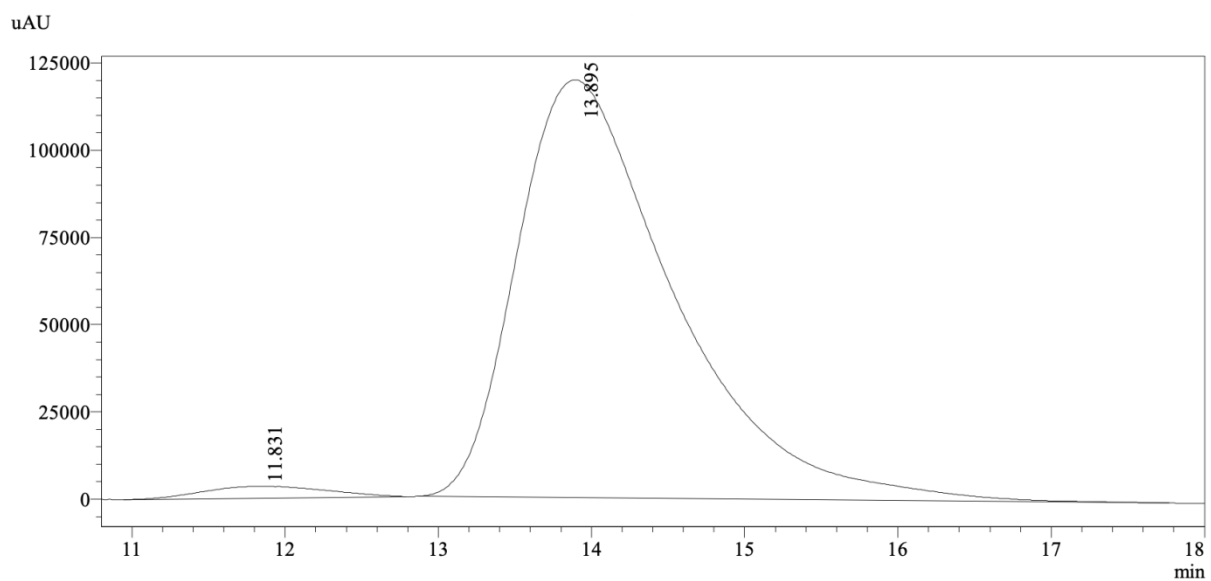

Peak Table

| PDA Ch1 210nm |           |        |          |         |
|---------------|-----------|--------|----------|---------|
| Peak#         | Ret. Time | Height | Area     | Area%   |
| 1             | 11.871    | 7230   | 478160   | 3.073   |
| 2             | 13.880    | 207600 | 15083779 | 96.927  |
| Total         |           | 214829 | 15561939 | 100.000 |

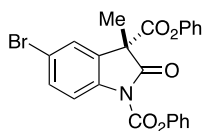

Datafile Name: yzq-R-Br-ADH-90-1.0-3.lcd  
 Sample Name: yzq-R-Br-ADH-90-1.0-3  
 Sample ID: 1

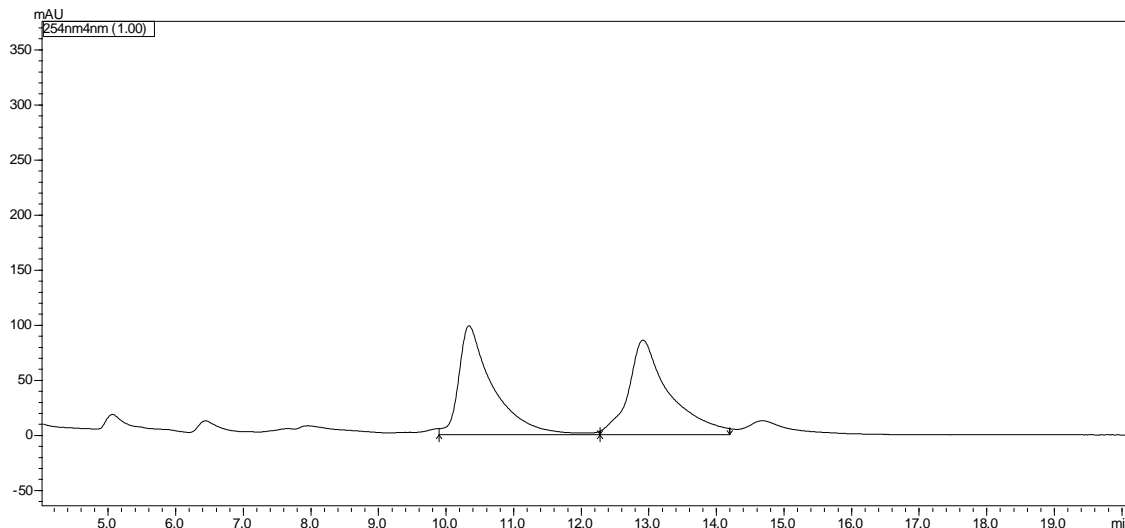

| Peak# | Ret. Time | Area    | Height | Area%   |
|-------|-----------|---------|--------|---------|
| 1     | 10.340    | 3474912 | 98893  | 49.055  |
| 2     | 12.913    | 3608816 | 85957  | 50.94   |
| Total |           | 7083728 | 184850 | 100.000 |

Datafile Name: yzq-C-Br-ADH-90-1.0.lcd  
 Sample Name: yzq-C-Br-ADH-90-1.0  
 Sample ID: 1

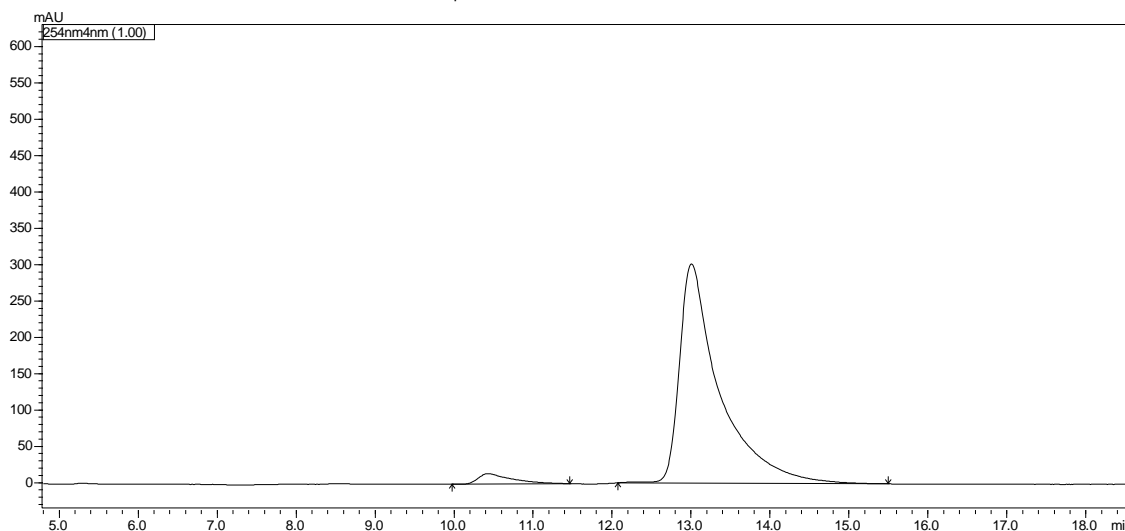

| Peak# | Ret. Time | Area     | Height | Area%   |
|-------|-----------|----------|--------|---------|
| 1     | 10.430    | 425742   | 14513  | 3.852   |
| 2     | 13.006    | 10628081 | 301389 | 96.148  |
| Total |           | 11053823 | 315902 | 100.000 |

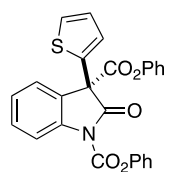

mV

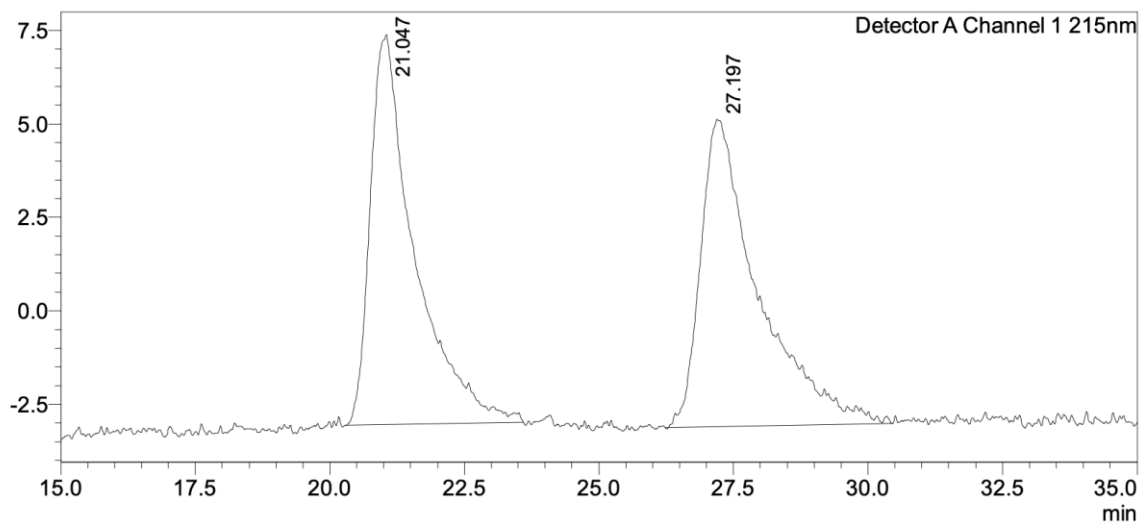

| Detector A Channel 1 215nm |           |         |         |
|----------------------------|-----------|---------|---------|
| Peak#                      | Ret. Time | Area    | Area%   |
| 1                          | 21.047    | 593290  | 49.308  |
| 2                          | 27.197    | 609940  | 50.692  |
| Total                      |           | 1203229 | 100.000 |

mV

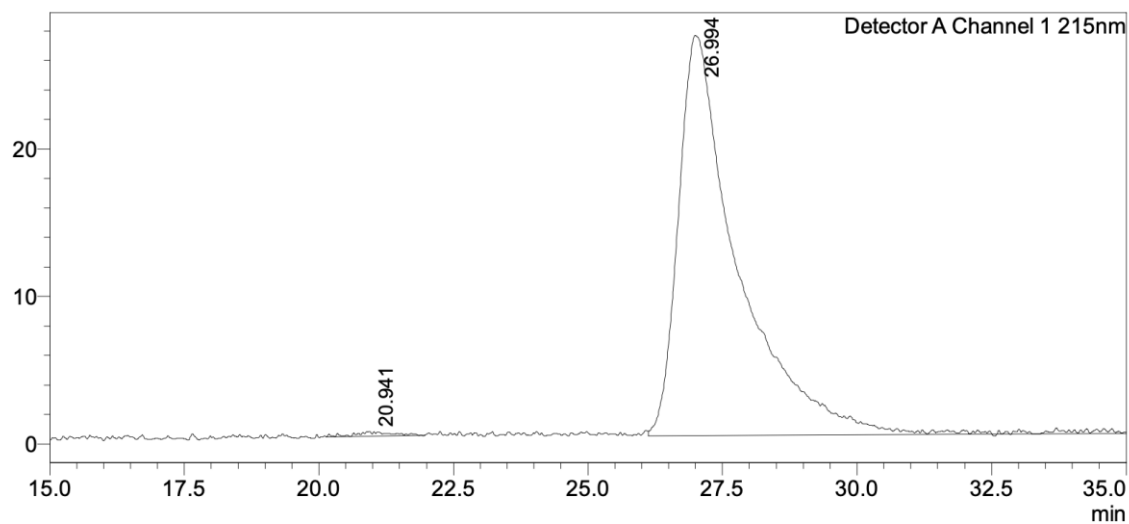

| Detector A Channel 1 215nm |           |         |         |
|----------------------------|-----------|---------|---------|
| Peak#                      | Ret. Time | Area    | Area%   |
| 1                          | 20.941    | 13553   | 0.708   |
| 2                          | 26.994    | 1899805 | 99.292  |
| Total                      |           | 1913358 | 100.000 |

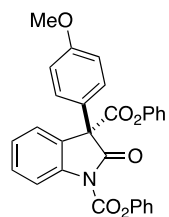

Datafile Name:y zq-R-OMe-IG3-90-1.0.lcd  
 Sample Name:y zq-R-OMe-IG3-90-1.0  
 Sample ID:1

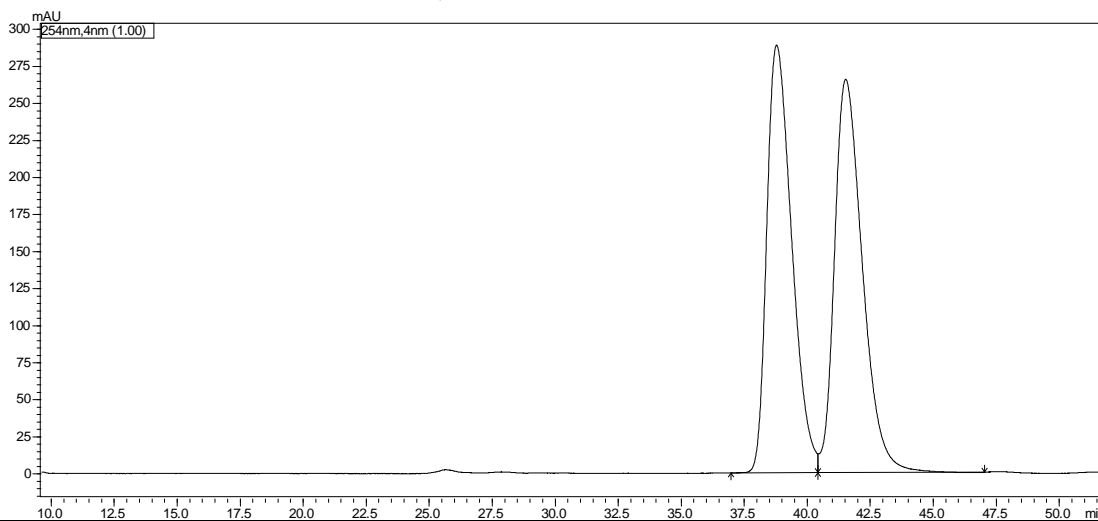

| Peak# | Ret. Time | Area     | Height | Area%   |
|-------|-----------|----------|--------|---------|
| 1     | 38.785    | 19858619 | 288712 | 49.270  |
| 2     | 41.524    | 20446899 | 265380 | 50.730  |
| Total |           | 40305518 | 554092 | 100.000 |

Datafile Name:y zq-C-OMe-IG3-90-1.0-2.lcd  
 Sample Name:y zq-C-OMe-IG3-90-1.0-2  
 Sample ID:1

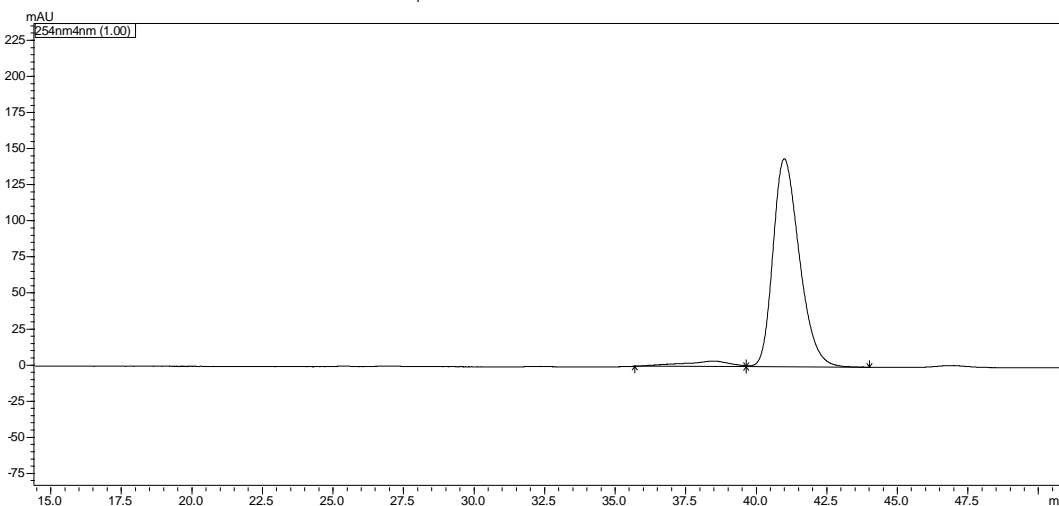

| Peak# | Ret. Time | Area    | Height | Area%   |
|-------|-----------|---------|--------|---------|
| 1     | 38.473    | 448611  | 3856   | 4.562   |
| 2     | 40.991    | 9384610 | 144253 | 95.438  |
| Total |           | 9833221 | 148110 | 100.000 |

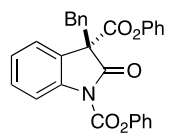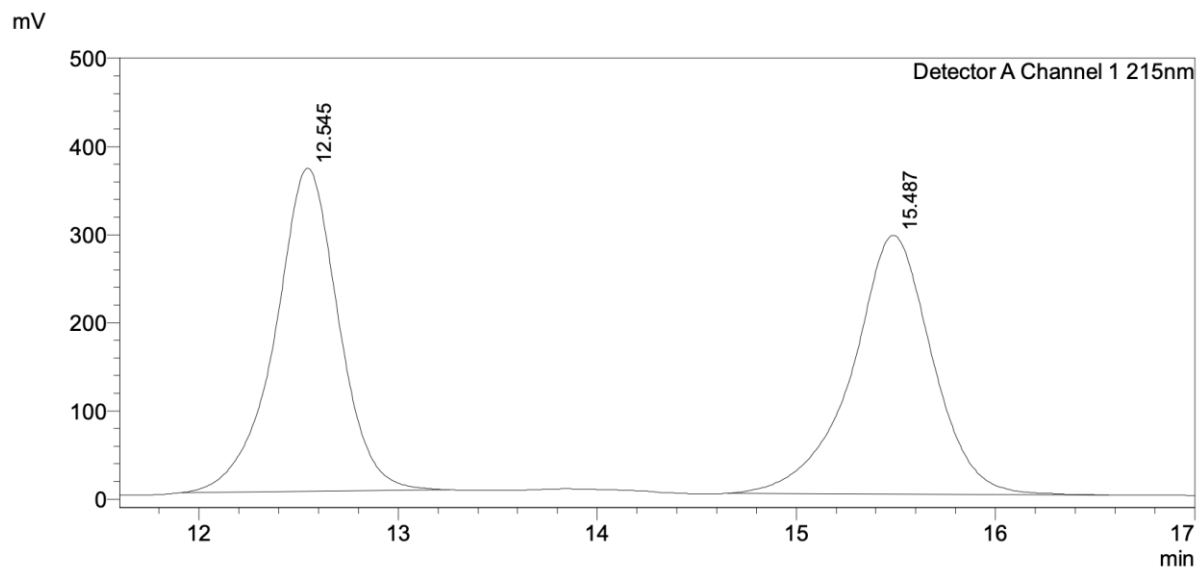

Detector A Channel 1 215nm

| Peak# | Ret. Time | Area     | Area%   |
|-------|-----------|----------|---------|
| 1     | 12.545    | 8124336  | 49.718  |
| 2     | 15.487    | 8216564  | 50.282  |
| Total |           | 16340900 | 100.000 |

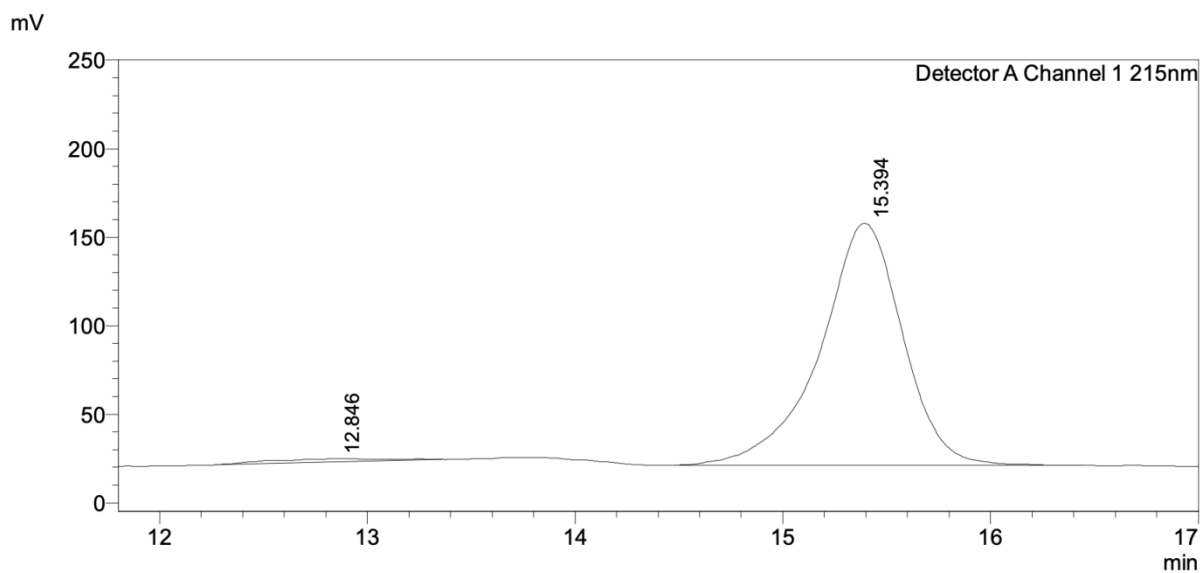

Detector A Channel 1 215nm

| Peak# | Ret. Time | Area    | Area%   |
|-------|-----------|---------|---------|
| 1     | 12.846    | 78494   | 2.027   |
| 2     | 15.394    | 3793927 | 97.973  |
| Total |           | 3872421 | 100.000 |

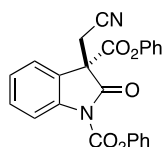

Datafile Name:y zq-R-CN-IG3-90-1.0-2.lcd  
 Sample Name:y zq-R-CN-IG3-90-1.0-2  
 Sample ID:1

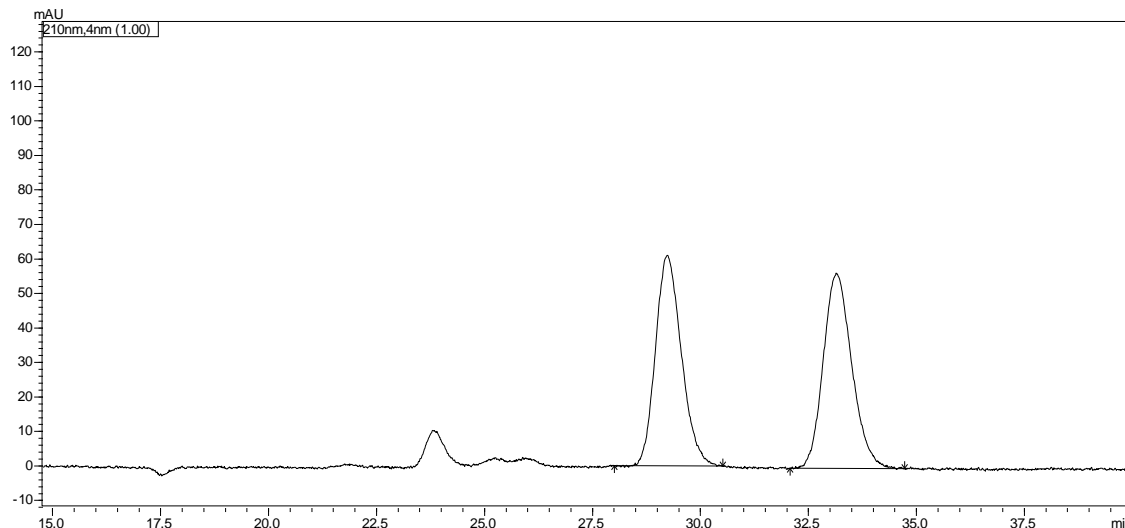

| Peak# | Ret. Time | Area    | Height | Area%   |
|-------|-----------|---------|--------|---------|
| 1     | 29.235    | 2536195 | 60969  | 49.347  |
| 2     | 33.144    | 2603317 | 56586  | 50.653  |
| Total |           | 5139512 | 117555 | 100.000 |

Datafile Name:y zq-C-CN-IG3-90-1.0.lcd  
 Sample Name:y zq-C-CN-IG3-90-1.0  
 Sample ID:1

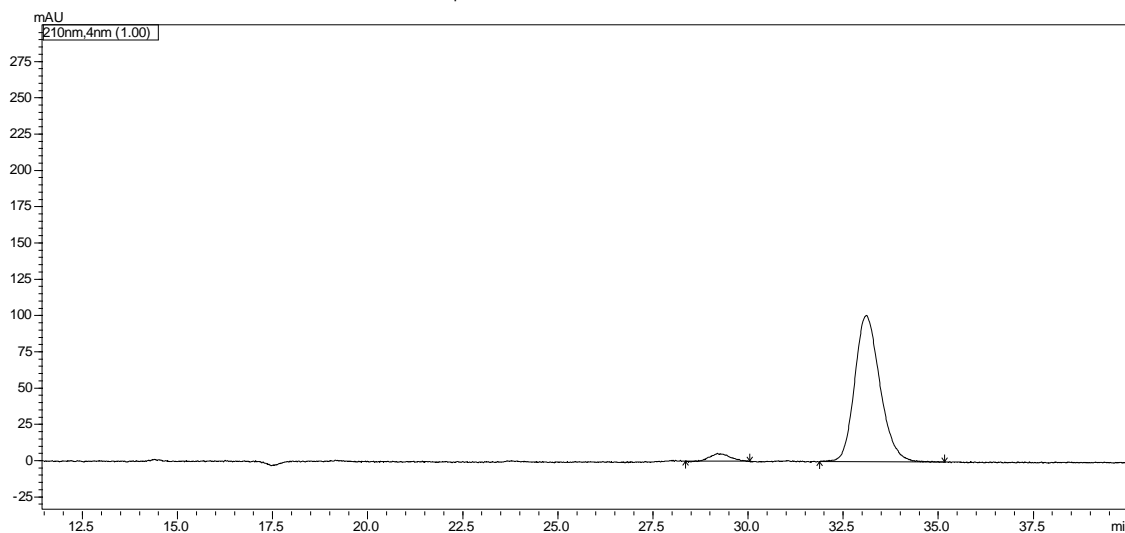

| Peak# | Ret. Time | Area    | Height | Area%   |
|-------|-----------|---------|--------|---------|
| 1     | 29.198    | 190478  | 5588   | 3.924   |
| 2     | 33.111    | 4664018 | 100886 | 96.076  |
| Total |           | 4854496 | 106474 | 100.000 |

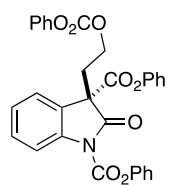

mV

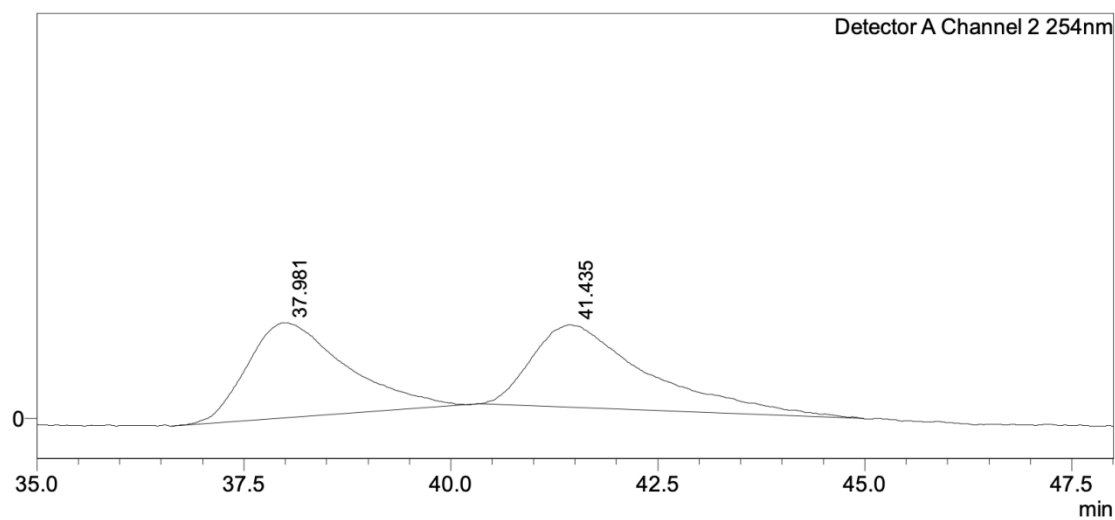

| Peak# | Ret. Time | Area   | Area%   |
|-------|-----------|--------|---------|
| 1     | 37.981    | 389766 | 49.550  |
| 2     | 41.435    | 396845 | 50.450  |
| Total |           | 786612 | 100.000 |

mV

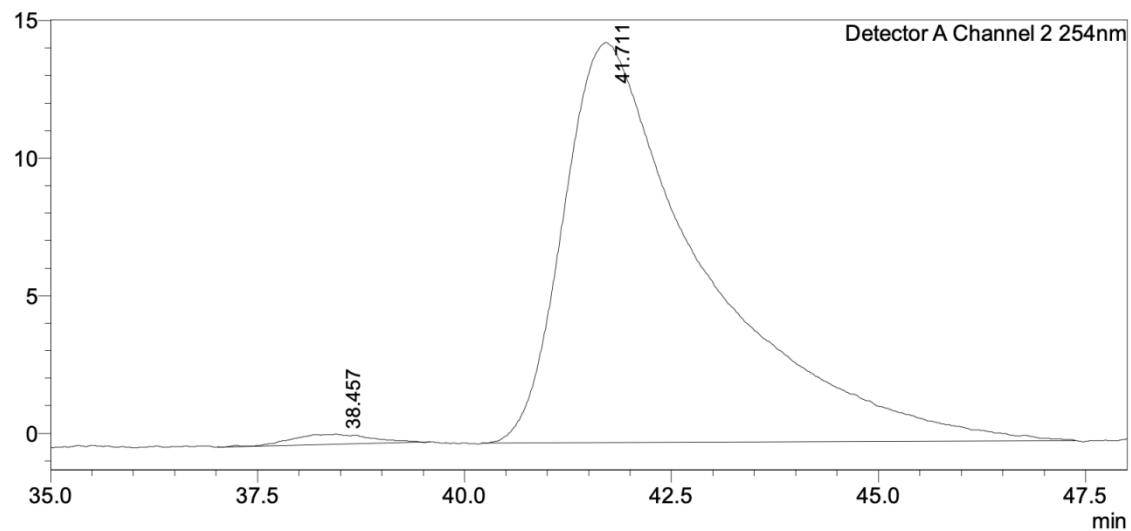

| Peak# | Ret. Time | Area    | Area%   |
|-------|-----------|---------|---------|
| 1     | 38.457    | 23563   | 1.352   |
| 2     | 41.711    | 1719001 | 98.648  |
| Total |           | 1742564 | 100.000 |
